# Supplementary material for: Evaluation of qPCR to Detect Shifts in Population Composition of the Rhizobial Symbiont Mesorhizobium japonicum during Serial in Planta Transfers
Source: Biology (Basel). 2023 Feb 9;12(2):277. doi: 10.3390/biology12020277 (PMC9953586; doi:10.3390/biology12020277)
Supplement: Supplementary file 1 [file biology-12-00277-s001.zip › biology-2128511 -Table S1 revised.xlsx]

## Sheet: README
Shifts in population composition during serial in planta transfers of the rhizobial symbiont Mesorhizobium loti
Tabs
Vitro	in vitro measurements of rhizobia proportions
CFUcount	Raw CFU data for individual nodules with potential for coinfection (genotype combos: R + 30; R + 6)
IndNods	Individual nodules with potential for coinfection (genotype combos: R + 30; R + 6)
Pouch	Passaging experiment conducted in germination pouches (genotype combos: R + 30; R + 6; 30 + 6)
MB	Passaging experiment conducted in magenta boxes (genotype combos: R + 30; R + 6; 30 + 6; R + 30 + 6)
Columns
exp	Experimental combination of genotypes (R = wildtype; 30 = STM30; 6 = STM6)
ID	Biological replicate
meth	Growth methodology for 'IndNods' Tab (Pouch = germination pouches; MB = Magenta Boxes; Px = Passage #)
tray	Analagous to a greenhouse/field block. Indicates timing and grouping for experiments in 'MB' Tab
lin	Multiple lineages maintained independence among same genotype combinations when passaging in 'MB' Tab
rep	Technical replicate for qPCR
pas	Passage number (0 = initial inoculation; 1 = first passage of nodule; 2 = second passage of noduels; 3 = harvest without passage) in 'Pouch' and 'MB' Tabs
nods	Number of nodules passaged in 'Pouch' and 'MB' Tabs
plants	Number of plants that survived growth phase in 'MB' Tab
CFUprop	Estimated proportion of more beneficial strain (R > 30 > 6) measured by colony forming units. The same value is used for each qPCR technical replicate ('rep')
CFUpop	Standardized CFU estimated population of sample (cell/mL). The same value is used for each qPCR technical replicate ('rep')
CTX	Measured qPCR ct value with specific X primer pair (R = wildtype; M = mutant STM30 or STM6; 30 = STM30; 6 = STM6)
CellX	Estimated starting number of cells in qPCR based on ct value (standard curve equations embedded; R = wildtype; M = mutant STM30 or STM6; 30 = STM30; 6 = STM6)
PropX	Calculated proportion of X genotype based on qPCR (R = wildtype; M = mutant STM30 or STM6; 30 = STM30; 6 = STM6)
qPCRpop	Standardized qPCR estimated population of sample (cell/mL)
CTXneg	Lowest measured qPCR CT value of negative control with specific X primer pair on a given 96-well plate (R = wildtype; M = mutant STM30 or STM6; 30 = STM30; 6 = STM6)

## Sheet: Vitro
exp	ID	rep	CFUpop	CFUprop	CTR	CTM	CellR	CellM	PropR	qPCRpop	CTRneg	CTMneg
R30	C	i	18583.3	0.302691	30.4036	29.4219	4222.71	9339.15	0.311367	13561.9	37.5268
R30	I	i	20800	0.153846	27.8537	25.0498	17102.6	98091	0.148468	115194	37.5268
R30	J	i	21466.7	0.378882	26.3031	25.1007	40037.9	95441.6	0.295527	135480	37.5268
R30	K	i	20133.3	0.390728	27.128	26.2939	25466	50236.9	0.336394	75702.9	37.5268
R30	L	i	24933.3	0.57754	25.1648	25.6535	74757.8	70893.8	0.513264	145652	37.5268
R30	M	i	26266.7	0.705584	25.3212	26.2636	68613.6	51062.1	0.573329	119676	37.5268
R30	N	i	29866.7	0.808036	25.3278	27.6832	68364	23793.7	0.741816	92157.6	37.5268
R30	O	i	25733.3	0.932642	25.8755	29.883	50623	7287.96	0.874152	57911	37.5268
R6	C	i	18541.7	0.137079	30.4134	30.2796	4199.94	7328.24	0.364319	11528.2	37.5268
R6	I	i	36533.3	0.10219	26.9148	25.7434	28625.1	90584.6	0.240124	119210	37.5268
R6	J	i	36133.3	0.173432	27.2747	27.049	23496.1	43927.2	0.348487	67423.3	37.5268
R6	K	i	28400	0.28169	25.3722	25.9675	66719.8	80003.7	0.454731	146724	37.5268
R6	L	i	33200	0.46988	24.1895	25.6687	127649	94415.6	0.574828	222064	37.5268
R6	M	i	35866.7	0.587361	24.0336	27.3464	139046	37251.3	0.788701	176297	37.5268
R6	N	i	28400	0.713615	24.0221	28.0168	139928	25688.5	0.844892	165617	37.5268
R6	O	i	29600	0.905405	24.537	29.3173	105496	12492.4	0.894121	117988	37.5268
R30	C	ii	18583.3	0.302691	29.9633	29.0676	5376.29	11299.6	0.322398	16675.9	38.2478
R30	I	ii	20800	0.153846	28.066	24.6706	15222.7	120286	0.112337	135508	38.2478
R30	J	ii	21466.7	0.378882	26.323	24.4201	39603.5	137635	0.223447	177239	38.2478
R30	K	ii	20133.3	0.390728	27.0762	26.2054	26199.2	52686.4	0.332116	78885.6	38.2478
R30	L	ii	24933.3	0.57754	25.0527	25.0162	79501.7	99879.5	0.4432	179381	38.2478
R30	M	ii	26266.7	0.705584	24.6346	26.3195	99994.8	49547.9	0.668671	149543	38.2478
R30	N	ii	29866.7	0.808036	25.3882	27.1997	66135.5	30861.7	0.681829	96997.2	38.2478
R30	O	ii	25733.3	0.932642	25.4931	29.0904	62439.1	11162.2	0.848342	73601.3	38.2478
R6	C	ii	18541.7	0.137079	30.7648	29.8324	3463.73	9389.91	0.269475	12853.6	38.2478	37.7197
R6	I	ii	36533.3	0.10219	27.0813	25.4361	26126.4	107404	0.195659	133530	38.2478	37.7197
R6	J	ii	36133.3	0.173432	27.1683	26.427	24909.5	62013.3	0.286571	86922.8	38.2478	37.7197
R6	K	ii	28400	0.28169	25.1864	24.8083	73879.2	152111	0.326913	225990	38.2478	37.7197
R6	L	ii	33200	0.46988	23.8939	25.0967	150120	129642	0.536599	279763	38.2478	37.7197
R6	M	ii	35866.7	0.587361	23.8985	26.5789	149746	57004	0.724285	206750	38.2478	37.7197
R6	N	ii	28400	0.713615	24.1253	27.9454	132226	26725.4	0.831864	158951	38.2478	37.7197
R6	O	ii	29600	0.905405	24.2688	29.0692	122217	14334.9	0.895022	136552	38.2478	37.7197

## Sheet: CFUcount
Inoc	exp	ID	Red CFU1	Red CFU2	Red CFU3	M CFU1	M CFU2	M CFU3	PropRtotal	PropRCFU1	PropRCFU2	PropRCFU3	PropRavg
R30	Pouch	1A	TMTC	TMTC	TMTC	0	0	0	1	1	1	1	1
R30	Pouch	1B	95	93	92	27	23	25	0.788732	0.778689	0.801724	0.786325	0.788912
R30	Pouch	1C	353	310	286	0	0	0	1	1	1	1	1
R30	Pouch	1D	252	249	262	0	0	0	1	1	1	1	1
R30	Pouch	9A	398	378	342	0	0	0	1	1	1	1	1
R30	Pouch	9B	0	0	0	152	144	134	0	0	0	0	0
R30	Pouch	9C	0	0	0	76	68	90	0	0	0	0	0
R30	Pouch	9D	229	289	267	1	2	3	0.992415	0.995652	0.993127	0.988889	0.992556
R6	Pouch	1A	30	24	19	67	63	64	0.273408	0.309278	0.275862	0.228916	0.271352
R6	Pouch	1B	0	0	0	43	44	50	0	0	0	0	0
R6	Pouch	1C	526	545	0	0	0	0	1	1	1		1
R6	Pouch	1D	129	104		97	115		0.523596	0.570796	0.474886		0.522841
R6	Pouch	9A	TMTC	TMTC	TMTC	0	0	0	1	1	1	1	1
R6	Pouch	9B	0	0	0	120	160	127	0	0	0	0	0
R6	Pouch	9C	0	0	0	205	187	187	0	0	0	0	0
R6	Pouch	9D	0	0	0	94	136	58	0	0	0	0	0
R30	A1	1				78	107	73	0	0	0	0	0
R30	A1	2				199	205	147	0	0	0	0	0
R30	A1	3				52	35	63	0	0	0	0	0
R30	A1	4				19	21	23	0	0	0	0	0
R30	A1	5	200	221	269				1	1	1	1	1
R30	A1	6				3	5	2	0	0	0	0	0
R30	A1	7				1	5	3	0	0	0	0	0
R6	A1	1				19	27	25	0	0	0	0	0
R6	A1	2				26	20	15	0	0	0	0	0
R6	A1	3				237	270	277	0	0	0	0	0
R6	A1	4				4	6	5	0	0	0	0	0
R6	A1	5				56	37	42	0	0	0	0	0
R6	A1	6
R6	A1	7				78	74	73	0	0	0	0	0
R30	C1	8	59	69	72	106	116	80	0.398406	0.357576	0.372973	0.473684	0.401411
R30	C1	9				117	71	87	0	0	0	0	0
R30	C1	10				152	125	169	0	0	0	0	0
R30	C1	11	197	138	138				1	1	1	1	1
R30	C1	12				141	131	102	0	0	0	0	0
R30	C1	13	93	81	54	99	69	68	0.491379	0.484375	0.54	0.442623	0.488999
R30	C1	14				9	5	5	0	0	0	0	0
R6	C1	8
R6	C1	9				40	35	27	0	0	0	0	0
R6	C1	10				30	16	22	0	0	0	0	0
R6	C1	11				25	29	34	0	0	0	0	0
R6	C1	12	79	74	101	69	66	77	0.545064	0.533784	0.528571	0.567416	0.543257
R6	C1	13
R6	C1	14				39	48	38	0	0	0	0	0
R30	E1	15	222	228	201				1	1	1	1	1
R30	E1	16				126	124	136	0	0	0	0	0
R30	E1	17				105	99	86	0	0	0	0	0
R30	E1	18				101	107	77	0	0	0	0	0
R30	E1	19
R30	E1	20				16	30	25	0	0	0	0	0
R30	E1	21				185	107	153	0	0	0	0	0
R6	E1	15	71	28	52				1	1	1	1	1
R6	E1	16				33	44	33	0	0	0	0	0
R6	E1	17				17	19	13	0	0	0	0	0
R6	E1	18	125	158	132	72	76	73	0.652516	0.634518	0.675214	0.643902	0.651211
R6	E1	19				52	40	43	0	0	0	0	0
R6	E1	20				9	19	11	0	0	0	0	0
R6	E1	21				135	163	146	0	0	0	0	0
R30	A2	22				64	83	77	0	0	0	0	0
R30	A2	23				14	15	11	0	0	0	0	0
R30	A2	24	112	134	143				1	1	1	1	1
R30	A2	25	101	112	113	25	16	21	0.840206	0.801587	0.875	0.843284	0.839957
R30	A2	26	87	80	77	70	69	62	0.548315	0.55414	0.536913	0.553957	0.548337
R30	A2	27	69	67	85	74	91	106	0.449187	0.482517	0.424051	0.445026	0.450531
R30	A2	28				74	77	95	0	0	0	0	0
R6	A2	22				139	163	163	0	0	0	0	0
R6	A2	23	46	43	39	60	44	55	0.445993	0.433962	0.494253	0.414894	0.447703
R6	A2	24				42	48	41	0	0	0	0	0
R6	A2	25				42	29	27	0	0	0	0	0
R6	A2	26
R6	A2	27				22	28	22	0	0	0	0	0
R6	A2	28				60	66	65	0	0	0	0	0
R30	C2	29	109	84	80				1	1	1	1	1
R30	C2	30	147	125	132				1	1	1	1	1
R30	C2	31				8	10	14	0	0	0	0	0
R30	C2	32				219	222	244	0	0	0	0	0
R30	C2	33	241	250	304				1	1	1	1	1
R30	C2	34	73	76	93				1	1	1	1	1
R30	C2	35				91	73	89	0	0	0	0	0
R6	C2	29	21	19	20	157	187	158	0.106762	0.117978	0.092233	0.11236	0.107523
R6	C2	30	201	235	241	14	11	12	0.948179	0.934884	0.955285	0.952569	0.947579
R6	C2	31	0	0	0	0	0	0
R6	C2	32	188	178	192	15	9	15	0.934673	0.926108	0.951872	0.927536	0.935172
R6	C2	33				35	35	36	0	0	0	0	0
R6	C2	34				15	25	27	0	0	0	0	0
R6	C2	35				29	41	27	0	0	0	0	0
R30	A3	43	112	89	74				1	1	1	1	1
R30	A3	44
R30	A3	45	135	162	179				1	1	1	1	1
R30	A3	46				48	42	32	0	0	0	0	0
R30	A3	47	297	313	269				1	1	1	1	1
R30	A3	48				8	3	12	0	0	0	0	0
R30	A3	49	174	154	236	74	71	75	0.719388	0.701613	0.684444	0.758842	0.714967
R6	A3	43				0	0	0
R6	A3	44				21	16	22	0	0	0	0	0
R6	A3	45	184	150	268	71	83	82	0.718377	0.721569	0.643777	0.765714	0.710353
R6	A3	46	210	150	135		2		0.995976	1	0.986842	1	0.995614
R6	A3	47	59	26	50	29	23	22	0.645933	0.670455	0.530612	0.694444	0.631837
R6	A3	48				0	0	0
R6	A3	49				0	0	0
R30	C3	50	190	173	182				1	1	1	1	1
R30	C3	51	232	243	229				1	1	1	1	1
R30	C3	52
R30	C3	53	162	91	61				1	1	1	1	1
R30	C3	54
R30	C3	55	102	103	154				1	1	1	1	1
R30	C3	56
R6	C3	50	72	84	89	99	129	106	0.423143	0.421053	0.394366	0.45641	0.423943
R6	C3	51		2		113	103	84	0.00662252	0	0.0190476	0	0.00634921
R6	C3	52
R6	C3	53				36	34	34	0	0	0	0	0
R6	C3	54				100	101	102	0	0	0	0	0
R6	C3	55
R6	C3	56				248	206	237	0	0	0	0	0
R30	E3	57	166						1	1			1
R30	E3	58	180	179	205				1	1	1	1	1
R30	E3	59	466						1	1			1
R30	E3	60	147	183		1	1		0.993976	0.993243	0.994565		0.993904
R30	E3	61	263	233					1	1	1		1
R30	E3	62				33	38	46	0	0	0	0	0
R30	E3	63	171	187					1	1	1		1
R6	E3	57				76	95	62	0	0	0	0	0
R6	E3	58				67	77		0	0	0		0
R6	E3	59				97	77	99	0	0	0	0	0
R6	E3	60				82	72	58	0	0	0	0	0
R6	E3	61	33	26		40	32		0.450382	0.452055	0.448276		0.450165
R6	E3	62	99	122	158	128	116	98	0.525659	0.436123	0.512605	0.617188	0.521972
R6	E3	63	42	31	47	53	45	45	0.456274	0.442105	0.407895	0.51087	0.453623
R30	MB	MB1	69	90		24	28		0.753555	0.741935	0.762712		0.752324
R30	MB	MB2	18	15	54	102	95	123	0.213759	0.15	0.136364	0.305085	0.197149
R30	MB	MB3	0	0	0	111	123	119	0	0	0	0	0
R30	MB	MB4
R30	MB	MB5
R30	MB	MB6	0	0		114	107		0	0	0		0
R30	MB	MB7	0	0	0	63	54	85	0	0	0	0	0
R30	MB	MB8				116	67	117	0	0	0	0	0
R30	MB	MB9	73	86					1	1	1		1
R30	MB	MB10
R30	MB	MB11
R30	MB	MB12	123	132	187				1	1	1	1	1
R30	MB	MB13	0	0	0	26	57	77	0	0	0	0	0
R30	MB	MB14
R30	MB	MB15	251						1	1			1
R30	MB	MB16	0	0	0	239	283	300	0	0	0	0	0
R30	MB	MB17	1	0		2	5		0.125	0.333333	0		0.166667
R30	MB	MB18	0	0	0	47	29	50	0	0	0	0	0
R30	MB	MB19	188	189	184				1	1	1	1	1
R30	MB	MB20	0	0	0	241	301	242	0	0	0	0	0
R30	MB	MB21
R30	MB	MB22	0	0	0	133	120	125	0	0	0	0	0
R6	MB	MB1
R6	MB	MB2
R6	MB	MB3	99	91	86	0	0	0	1	1	1	1	1
R6	MB	MB4	0	0	0	28	26	44	0	0	0	0	0
R6	MB	MB5	0	0	0	24	43	32	0	0	0	0	0
R6	MB	MB6	96	83	104	82	83	115	0.502664	0.539326	0.5	0.474886	0.504737
R6	MB	MB7	189	151		0	0	0	1	1	1		1
R6	MB	MB8	182	186	203				1	1	1	1	1
R6	MB	MB9	53	28	67	80	59	56	0.431487	0.398496	0.321839	0.544715	0.421684
R6	MB	MB10	0	0	0	2	6	3	0	0	0	0	0
R6	MB	MB11
R6	MB	MB12
R6	MB	MB13
R6	MB	MB14
R6	MB	MB15	126	148					1	1	1		1
R6	MB	MB16	31	25	46	48	45	42	0.43038	0.392405	0.357143	0.522727	0.424092
R6	MB	MB17	0	0	0	111	119	106	0	0	0	0	0
R6	MB	MB18	4	4	6	37	47	25	0.113821	0.097561	0.0784314	0.193548	0.12318
R6	MB	MB19	102	107	125				1	1	1	1	1
R6	MB	MB20	266	271	266				1	1	1	1	1
R6	MB	MB21	34	26	30	63	63	50	0.338346	0.350515	0.292135	0.375	0.339217
R6	MB	MB22

## Sheet: IndNods
exp	meth	ID	rep	CFUprop	CFUpop	CTR	CTM	CellR	CellM	PropR	qPCRpop	CTRneg	CTMneg
R30	MB	A	i	0.753555	21100000	26.0837	25.3914	45160.2	81628.5	0.356185	1.58486e+08	38.1165
R30	MB	B	i	0.213759	2.71333e+07	24.4306	25.7669	111837	66700.7	0.626407	2.23173e+08	38.1165
R30	MB	c	i	0	2.35333e+07		24.7463	0	115485	0	1.44356e+08	38.1165
R30	MB	D	i	0	280000	38.1363	27.0476	60.7239	33493.5	0.00180973	4.19427e+07	38.1165
R30	MB	E	i			36.4774	33.9979	150.864	796.787	0.159198		38.1165
R30	MB	F	i	0	22100000	37.1753	23.433	102.876	234055	0.000439344	2.92697e+08	38.1165
R30	MB	G	i	0	1.34667e+07	36.2632	24.8666	169.672	108250	0.00156496	1.35524e+08	38.1165
R30	MB	H	i	0	20000000	37.1462	22.3345	104.53	422600	0.000247288	5.28381e+08	38.1165
R30	MB	I	i	1	15900000	23.0009	36.0279	245006	267.389	0.99891	3.06592e+08	38.1165
R30	MB	J	i			38.1097	31.5012	61.6188	3052	0.0197901		38.1165
R30	MB	K	i			38.4348	32.5833	51.5541	1705.29	0.0293447		38.1165
R30	MB	L	i	1	2.94667e+07	23.0269		241541	0	1	3.01927e+08	38.1165
R30	MB	M	i	0	1.06667e+07		23.7621	0	196085	0	2.45107e+08	38.1165
R30	MB	N	i			38.4356	30.3016	51.5304	5818.38	0.00877874		38.1165
R30	MB	O	i	1	50200000	23.2675	36.836	211679	173.128	0.999183	2.64815e+08	38.1165
R30	MB	P	i	0	54800000	37.4258	21.0366	89.6696	849422	0.000105554	1.06189e+09	38.1165
R30	MB	Q	i	0.125	1600000	36.983	29.7966	114.32	7634.4	0.0147534	9.68589e+06	38.1165
R30	MB	R	i	0	0		30.6416	0	4846.07	0	6.05759e+06	38.1165
R30	MB	S	i	1	37400000	23.9225	38.4703	147781	71.8767	0.999514	1.84816e+08	38.1165
R30	MB	T	i	0	5.22667e+07		38.413	0	74.1266	0	92658.2	38.1165
R30	MB	U	i			36.9407	24.3124	117.004	145848	0.00080159		38.1165
R30	MB	V	i	0	2520000	37.6969	22.0892	77.2772	482223	0.000160226	6.02876e+08	38.1165
R30	Pouch	A	i	1	200000000	21.5214	37.5266	551653	119.409	0.999784	6.89715e+08	39.7871	38.8488
R30	Pouch	B	i	0.788732	2.36667e+07	26.5606	27.8845	34763.2	21352.9	0.619487	7.01452e+07	39.7871	38.8488
R30	Pouch	C	i	1	6.32667e+07	22.9791	39.2869	247959	46.3279	0.999813	3.10007e+08	39.7871	38.8488
R30	Pouch	D	i	1	5.08667e+07	24.0085	36.9708	140974	161.017	0.998859	1.76418e+08	39.7871	38.8488
R30	Pouch	E	i	1	7.45333e+07	21.6754	22.2105	506942	451745	0.528788	1.19836e+09	39.7871	38.8488
R30	Pouch	F	i	0	2.86667e+07		24.4921	0	132407	0	1.65508e+08	39.7871	38.8488
R30	Pouch	G	i	0	15600000	39.0224	25.4859	37.3491	77582.5	0.00048118	9.70249e+07	39.7871	38.8488
R30	Pouch	H	i	0.992415	5.27333e+06	23.2331		215706	0	1	2.69632e+08	39.7871	38.8488
R30	MB P1	A	i	0	86000000		23.2742	0	254932	0	3.18665e+08	37.5526	35.8728
R30	MB P1	B	i	0	1.83667e+08		26.1172	0	55245.7	0	6.90571e+07	37.5526	35.8728
R30	MB P1	c	i	0	50000000	37.5723	30.0467	82.7439	6673.57	0.0122469	8.44539e+06	37.5526	35.8728
R30	MB P1	D	i	0	21000000		27.6413	0	24336.4	0	3.04205e+07	37.5526	35.8728
R30	MB P1	E	i	1	230000000	27.1693	36.3476	24895.1	225.14	0.991038	3.14004e+07	37.5526	35.8728
R30	MB P1	F	i	0	1.66667e+06		28.3344	0	16762.8	0	2.09535e+07	37.5526	35.8728
R30	MB P1	G	i	0	5.43333e+06	37.1595	31.3078	103.771	3386.57	0.0297308	4.36293e+06	37.5526	35.8728
R30	MB P1	H	i	0.398406	6.69333e+08	24.0496	23.7325	137829	199230	0.408918	4.21324e+08	37.5526	35.8728
R30	MB P1	I	i	0	9.16667e+07	37.293	27.4732	96.446	26640	0.00360728	3.34206e+07	37.5526	35.8728
R30	MB P1	J	i	0	1.48667e+08		33.9789	0	804.985	0	1.00623e+06	37.5526	35.8728
R30	MB P1	K	i	1	1.57667e+08	25.1985	36.2432	73391.5	238.151	0.996766	9.20371e+07	37.5526	35.8728
R30	MB P1	L	i	0	1.24667e+08	31.7243	25.1965	2046.18	90648.5	0.0220744	1.15868e+08	37.5526	35.8728
R30	MB P1	M	i	0.491379	6.18667e+08	25.2113	23.8883	72877.9	183219	0.284572	3.20121e+08	37.5526	35.8728
R30	MB P1	N	i	0	1.54333e+07	36.8332	27.4314	124.115	27244.8	0.00453489	3.42112e+07	37.5526	35.8728
R30	MB P1	O	i	1	434000000	24.2675		122301	0	1	1.52876e+08	37.5526	35.8728
R30	MB P1	P	i	0	2.57333e+08		28.805	0	13014.3	0	1.62679e+07	37.5526	35.8728
R30	MB P1	Q	i	0	1.93333e+08	36.1561	28.6746	179.939	13959.9	0.0127257	1.76747e+07	37.5526	35.8728
R30	MB P1	R	i	0	190000000	37.5695	27.3266	82.8716	28825	0.00286675	3.61348e+07	37.5526	35.8728
R30	MB P1	S	i		0	36.7538		129.635	0	1	162044	37.5526	35.8728
R30	MB P1	T	i	0	33000000	37.8824	30.5369	69.7991	5126.64	0.0134321	6.49555e+06	37.5526	35.8728
R30	MB P1	U	i	0	2.96667e+08	38.9987	26.3822	37.8369	47905.6	0.000789198	5.99293e+07	37.5526	35.8728
R30	MB P2	A	i	0	1.49333e+08			28.6736				37.5741
R30	MB P2	B	i	0	2.79333e+07			30.3559				37.5741
R30	MB P2	c	i	1	2.59333e+08	25.2879	25.3088	36.4048	85337.6	0.000426415	1.06718e+08	37.5741
R30	MB P2	D	i	0.840206	2.58667e+08	25.6334	24.9123	26.983	105625	0.000255394	1.32065e+08	37.5741
R30	MB P2	E	i	0.548315	2.96667e+08	28.2436	27.733	26.609	23164.9	0.00114736	2.89894e+07	37.5741
R30	MB P2	F	i	0.449187	328000000	29.1	28.4523	25.3838	15732.7	0.00161085	1.96976e+07	37.5741
R30	MB P2	G	i	0	164000000	38.4031	37.1334	27.6861	147.532	0.158009	219022	37.5741
R30	MB P2	H	i	1	182000000	26.3966	25.7742	36.5653	66439.7	0.000550051	8.30953e+07	37.5741
R30	MB P2	I	i	1	2.69333e+08	27.3305	27.0496	36.5942	33456.4	0.00109259	4.18662e+07	37.5741
R30	MB P2	J	i	0	2.13333e+07	35.3524	37.6792	23.0274	110.001	0.173102	166286	37.5741
R30	MB P2	K	i	0	4.56667e+08	37.5893	35.829	23.6598	297.574	0.0736529	401542	37.5741
R30	MB P2	L	i	1	530000000	24.5585	24.3486		143034	0	1.78792e+08	37.5741
R30	MB P2	M	i	1	1.61333e+08	28.9061	28.435	36.3313	15880	0.00228265	1.98954e+07	37.5741
R30	MB P2	N	i	0	1.68667e+08	36.4941	37.2852	30.4378	135.969	0.182912	208009	37.5741
R30	MB P2	O	i		0	37.3045	38.0038		92.3763	0	115470	37.5741
R30	MB P2	P	i	1	388000000	25.8923	24.9515		103417	0	1.29271e+08	37.5741
R30	MB P2	Q	i	1	1.13333e+07	27.4138	27.4245	37.2632	27347.2	0.00136074	3.42306e+07	37.5741
R30	MB P2	R	i	1	2.51333e+08	27.5738	27.6454		24282.9	0	3.03537e+07	37.5741
R30	MB P2	S	i	1	4.98667e+08	23.9085	23.5789	37.1894	216394	0.00017183	2.70539e+08	37.5741
R30	MB P2	T	i	0	7.13333e+06	37.3945	38.5755	31.3171	67.9222	0.315571	124049	37.5741
R30	MB P2	U	i	0	4600000	37.3537		33.3312	0	1	41664	37.5741
R30	MB P3	A	i	1	1.83333e+08	26.1364	35.2879	43873.6	398.104	0.991008	5.53396e+07	35.4422	32.9711
R30	MB P3	B	i		0	38.2099	37.3449	58.3221	131.668	0.306974	237488	35.4422	32.9711
R30	MB P3	c	i	1	3.17333e+08	22.1595	34.3	388716	677.288	0.998261	4.86742e+08	35.4422	32.9711
R30	MB P3	D	i	0	48200000	35.3476	29.8405	280.375	7456.26	0.0362399	9.67079e+06	35.4422	32.9711
R30	MB P3	E	i	1	586000000	21.1181	36.3303	688232	227.245	0.99967	8.60574e+08	35.4422	32.9711
R30	MB P3	F	i	0	1.41333e+07		23.0423					35.4422	32.9711
R30	MB P3	G	i	0.719388	5.22667e+08	23.8274	24.449	155695	135516	0.534647	3.64013e+08	35.4422	32.9711
R30	MB P3	H	i	1	3.63333e+08	36.291		167.101	0	1	208877	35.4422	32.9711
R30	MB P3	I	i	0.998582	470000000	24.0204	36.1161	140058	255	0.998183	1.75391e+08	35.4422	32.9711
R30	MB P3	J	i		0	35.21	38.019	302.362	91.6256	0.76744	492484	35.4422	32.9711
R30	MB P3	K	i	1	2.09333e+08	28.9478	35.4842	9384.36	358.223	0.963231	1.21782e+07	35.4422	32.9711
R30	MB P3	L	i		0	31.9618	33.3456	1796.28	1131.71	0.613486	3.65998e+06	35.4422	32.9711
R30	MB P3	M	i	1	2.39333e+08	28.0964		14971.2	0	1	1.87141e+07	35.4422	32.9711
R30	MB P3	N	i		0	30.6516		3685.47	0	1	4.60684e+06	35.4422	32.9711
R30	MB P3	O	i	1	1.10667e+08	29.1663		8324.29	0	1	1.04054e+07	35.4422	32.9711
R30	MB P3	P	i	1	376000000	26.2764	36.9731	40629.5	160.818	0.996057	5.09879e+07	35.4422	32.9711
R30	MB P3	Q	i	1	3.10667e+08	24.9876		82391.7	0	1	1.0299e+08	35.4422	32.9711
R30	MB P3	R	i	0.993976	2.21333e+08	27.8604		17040.3	0	1	2.13004e+07	35.4422	32.9711
R30	MB P3	S	i	1	3.30667e+08	28.8419		9946	0	1	1.24325e+07	35.4422	32.9711
R30	MB P3	T	i	0	78000000		32.2491	0	2041.1	0	2.55138e+06	35.4422	32.9711
R30	MB P3	U	i	1	2.38667e+08	26.3602	28.3204	38803.7	16890	0.696735	6.96171e+07	35.4422	32.9711
R6	MB	A	i		0	36.61	34.4844	140.283	712.388	0.164521	1.06584e+06	36.1858	34.7595
R6	MB	B	i		0	34.529	30.2934	439.312	7272.37	0.056967	9.63961e+06	36.1858	34.7595
R6	MB	c	i	1	36800000	24.7051	35.2294	96200	471.377	0.995124	1.20839e+08	36.1858	34.7595
R6	MB	D	i	0	1.30667e+07	36.3001	27.7156	166.276	30356.2	0.00544767	3.81531e+07	36.1858	34.7595
R6	MB	E	i	0	13200000	37.4552	28.4905	88.2347	19756.6	0.00444623	2.4806e+07	36.1858	34.7595
R6	MB	F	i	0.502664	7.50667e+07	24.0682	24.9478	136434	140799	0.492128	3.46541e+08	36.1858	34.7595
R6	MB	G	i	1	68000000	22.8964	35.8637	259462	331.638	0.998723	3.24743e+08	36.1858	34.7595
R6	MB	H	i	1	7.61333e+07	22.1243	34.5559	396294	684.706	0.998275	4.96224e+08	36.1858	34.7595
R6	MB	I	i	0.431487	4.57333e+07	22.4787	24.3106	326286	200445	0.619455	6.58413e+08	36.1858	34.7595
R6	MB	J	i	0	146667	36.2629	27.2778	169.699	38694.8	0.00436643	4.85806e+07	36.1858	34.7595
R6	MB	K	i		0	36.199	34.8142	175.754	593.351	0.228518	961381	36.1858	34.7595
R6	MB	L	i		0	38.6907	32.0988	44.8025	2673.19	0.0164837	3.39749e+06	36.1858	34.7595
R6	MB	M	i		0	38.2252	35.5463	57.8346	395.435	0.127594	566587	36.1858	34.7595
R6	MB	N	i		0	36.4554	35.1598	152.698	489.895	0.237628	803241	36.1858	34.7595
R6	MB	O	i	1	54800000	23.4906	35.6603	187290	371.219	0.998022	2.34576e+08	36.1858	34.7595
R6	MB	P	i	0.43038	31600000	26.3123	26.8873	39837.7	48046.4	0.453298	1.09855e+08	36.1858	34.7595
R6	MB	Q	i	0	44800000	35.8955	26.367	207.594	64110	0.00322764	8.03969e+07	36.1858	34.7595
R6	MB	R	i	0.113821	16400000	32.3131	30.7826	1481.38	5545.03	0.21083	8.78302e+06	36.1858	34.7595
R6	MB	S	i	1	4.45333e+07	24.3809	36.4949	114923	233.718	0.99797	1.43946e+08	36.1858	34.7595
R6	MB	T	i	1	1.07067e+08	23.3227	36.5647	205356	224.85	0.998906	2.56976e+08	36.1858	34.7595
R6	MB	U	i	0.338346	3.54667e+07	28.8273	28.6636	10025.9	17948.4	0.358398	3.49679e+07	36.1858	34.7595
R6	MB	V	i		0	35.8724	32.6275	210.241	1994.15	0.0953736	2.75549e+06	36.1858	34.7595
R6	Pouch	A	i	0.273408	35600000	26.41	27.6043	37757.9	32289.5	0.539034	8.75592e+07	39.7871	36.1148
R6	Pouch	B	i	0	1.82667e+06	38.01	30.5919	65.0818	6163.07	0.0104496	7.78519e+06	39.7871	36.1148
R6	Pouch	C	i	1	142800000	21.3906		592679	0	1	7.40849e+08	39.7871	36.1148
R6	Pouch	D	i	0.523596	5.93333e+07	25.1452	28.3583	75567.4	21258.2	0.780449	1.21032e+08	39.7871	36.1148
R6	Pouch	E	i	1	400000000	20.3766	37.8343	1.0337e+06	111.235	0.999892	1.29227e+09	39.7871	36.1148
R6	Pouch	F	i	0	5.42667e+07		26.3169	0	65913.9	0	8.23924e+07	39.7871	36.1148
R6	Pouch	G	i	0	77200000		26.0864	0	74897.8	0	9.36223e+07	39.7871	36.1148
R6	Pouch	H	i	0	38400000	39.7871	26.5045	24.5527	59403.7	0.000413149	7.42853e+07	39.7871	36.1148
R6	MB P1	A	i	0	3.72333e+07		32.5704	0	2058.21	0	2.57277e+06	38.0824	36.1803
R6	MB P1	B	i	0	1.70333e+07	37.6619	34.4281	78.7764	734.975	0.0968064	1.01719e+06	38.0824	36.1803
R6	MB P1	c	i	0	2.61333e+08		31.102	0	4645.23	0	5.80654e+06	38.0824	36.1803
R6	MB P1	D	i	0	5000000	36.8094	32.874	125.746	1739.38	0.0674196	2.33141e+06	38.0824	36.1803
R6	MB P1	E	i	0	3.13333e+07	39.0573	34.4048	36.6402	744.532	0.0469041	976466	38.0824	36.1803
R6	MB P1	F	i		1.66667e+06	37.2931	31.41	96.4386	3916.05	0.0240346	5.01561e+06	38.0824	36.1803
R6	MB P1	G	i	0	75000000	38.174	32.4421	59.4815	2209.94	0.02621	2.83678e+06	38.0824	36.1803
R6	MB P1	H	i	0	133333	37.0052	35.1544	112.937	491.39	0.186881	755409	38.0824	36.1803
R6	MB P1	I	i	0	24600000		35.7496	0	353.28	0	441599	38.0824	36.1803
R6	MB P1	J	i	0	2.26667e+07		35.1843	0	483.292	0	604114	38.0824	36.1803
R6	MB P1	K	i	0	2.93333e+07		32.7621	0	1850.76	0	2.31345e+06	38.0824	36.1803
R6	MB P1	L	i	0.545064	6.21333e+08	22.3662	26.46	347056	60889.7	0.850741	5.09933e+08	38.0824	36.1803
R6	MB P1	M	i		0							38.0824	36.1803
R6	MB P1	N	i	0	3.90667e+07		34.2277	0	821.312	0	1.02664e+06	38.0824	36.1803
R6	MB P1	O	i	1	1.00667e+08	29.047		8887.27	0	1	1.11091e+07	38.0824	36.1803
R6	MB P1	P	i	0	4.26667e+07		35.4138	0	425.571	0	531963	38.0824	36.1803
R6	MB P1	Q	i	0	1.86667e+07	37.1379	34.6024	105.008	667.269	0.135972	965346	38.0824	36.1803
R6	MB P1	R	i	0.652516	424000000	25.8109	30.6776	52450.4	5877.19	0.899238	7.29095e+07	38.0824	36.1803
R6	MB P1	S	i	0	3.75333e+07	36.2734	33.6078	168.725	1158.12	0.127163	1.65856e+06	38.0824	36.1803
R6	MB P1	T	i	0	2.35333e+07		35.5174	0	401.808	0	502259	38.0824	36.1803
R6	MB P1	U	i	0	296000000	37.4041	29.7174	90.74	10007.7	0.00898556	1.2623e+07	38.0824	36.1803
R6	MB P2	A	i	0	310000000		29.1619	0	13616.4	0	1.70205e+07	38.7924	35.961
R6	MB P2	B	i	0.445993	1.91333e+08	28.3152	31.079	13277.5	4704.85	0.738363	2.24779e+07	38.7924	35.961
R6	MB P2	c	i	0	8.73333e+07	38.8399	30.8426	41.2807	5363.62	0.00763764	6.75613e+06	38.7924	35.961
R6	MB P2	D	i	0	6.53333e+07		34.1516					38.7924	35.961
R6	MB P2	E	i	0	333333		34.4944					38.7924	35.961
R6	MB P2	F	i	0	48000000	36.9303	32.929	117.674	1687.19	0.0651985	2.25607e+06	38.7924	35.961
R6	MB P2	G	i	0	1.27333e+08		31.7898	0	3172.63	0	3.96578e+06	38.7924	35.961
R6	MB P2	H	i	0.106762	3.74667e+07	34.2392	32.4591	514.996	2189.27	0.190438	3.38034e+06	38.7924	35.961
R6	MB P2	I	i	0.948179	476000000	24.2288	35.0752	124923	513.444	0.995907	1.56795e+08	38.7924	35.961
R6	MB P2	J	i		0	36.2445	36.0188	171.422	304.318	0.360327	594674	38.7924	35.961
R6	MB P2	K	i	0.934673	398000000	25.3343	32.7192	68122.4	1895.25	0.972932	8.75221e+07	38.7924	35.961
R6	MB P2	L	i	0	7.06667e+07	36.2486	32.1569	171.039	2588.43	0.0619825	3.44934e+06	38.7924	35.961
R6	MB P2	M	i	0	4.46667e+07		34.0401					38.7924	35.961
R6	MB P2	N	i	0	6.46667e+07		34.4661	0	719.655	0	899569	38.7924	35.961
R6	MB P2	O	i		0	27.4807	36.9342	20985.6	183.205	0.991346	2.64609e+07	38.7924	35.961
R6	MB P2	P	i		0	37.7069	35.1827	76.8538	483.741	0.137093	700744	38.7924	35.961
R6	MB P2	Q	i		0	39.3988	34.4174	30.3813	739.343	0.0394704	962155	38.7924	35.961
R6	MB P2	R	i		0		36.2642					38.7924	35.961
R6	MB P2	S	i		0	38.2514	33.4609	57.0113	1256.37	0.0434079	1.64173e+06	38.7924	35.961
R6	MB P2	T	i		0	36.6417	30.8064	137.86	5472.38	0.0245728	7.0128e+06	38.7924	35.961
R6	MB P2	U	i		0	36.375	34.5618	159.58	682.475	0.189512	1.05257e+06	38.7924	35.961
R6	MB P3	A	i		0		32.7646						36.9116
R6	MB P3	B	i	0	3.93333e+07	36.3339	36.5622	163.22	225.167	0.420251	485484		36.9116
R6	MB P3	c	i	0.718377	5.58667e+08	23.5535	27.1394	180942	41781	0.812408	2.78403e+08		36.9116
R6	MB P3	D	i	0.995976	3.31333e+08	33.4976	35.642	773.548	375.003	0.673499	1.43569e+06		36.9116
R6	MB P3	E	i	0.645933	1.39333e+08	28.6956	31.2558	10777.2	4265.56	0.716438	1.88034e+07		36.9116
R6	MB P3	F	i		0	36.0975	37.3816	185.823	142.963	0.56518	410982		36.9116
R6	MB P3	G	i		0		36.4045						36.9116
R6	MB P3	H	i	0.423143	386000000	29.1851	32.2539	8238.97	2452.94	0.770579	1.33649e+07		36.9116
R6	MB P3	I	i	0.00662252	2.01333e+08		34.861						36.9116
R6	MB P3	J	i		0	36.3497	37.7438	161.809	116.962	0.580437	348464		36.9116
R6	MB P3	K	i	0	6.93333e+07		33.8739						36.9116
R6	MB P3	L	i	0	202000000		35.6658						36.9116
R6	MB P3	M	i		0		34.9662						36.9116
R6	MB P3	N	i	0	4.60667e+08		33.0715						36.9116
R6	MB P3	O	i	0	1.55333e+08		33.737						36.9116
R6	MB P3	P	i	0	96000000		32.8469						36.9116
R6	MB P3	Q	i	0	182000000	36.0064	37.3124	195.338	148.556	0.568018	429867		36.9116
R6	MB P3	R	i	0	1.41333e+08		34.8953						36.9116
R6	MB P3	S	i	0.450382	8.73333e+07	32.294	33.327	1497.02	1353.17	0.525235	3.56273e+06		36.9116
R6	MB P3	T	i	0.525659	4.80667e+08	22.6423	26.7491	298268	51871.8	0.851854	4.37675e+08		36.9116
R6	MB P3	U	i	0.456274	1.75333e+08	32.1897	32.5362	1585.14	2097.66	0.430418	4.6035e+06		36.9116
R30	MB	A	ii	0.753555	21100000	25.8194	25.7277	52205.1	68121.2	0.433863	1.50408e+08	38.1165
R30	MB	B	ii	0.213759	2.71333e+07	24.2119	25.1556	126089	92667.8	0.576389	2.73446e+08	38.1165
R30	MB	c	ii	0	2.35333e+07	31.7949	25.7999	1968.45	65524.5	0.0291652	8.43662e+07	38.1165
R30	MB	D	ii	0	280000	36.9477	27.1104	116.56	32379.5	0.00358688	4.06201e+07	38.1165
R30	MB	E	ii									38.1165
R30	MB	F	ii	0	22100000	36.3592	25.8597	160.969	63453.2	0.00253039	7.95177e+07	38.1165
R30	MB	G	ii	0	1.34667e+07		25.2035	0	90310.2	0	1.12888e+08	38.1165
R30	MB	H	ii	0	20000000	38.8202	22.4567	41.7282	395730	0.000105435	4.94715e+08	38.1165
R30	MB	I	ii	1	15900000	23.3606	37.9389	201132	95.6572	0.999525	2.51534e+08	38.1165
R30	MB	J	ii				31.9454	0	2403.29	0		38.1165
R30	MB	K	ii			38.4862	33.308	50.1203	1154.81	0.0415961		38.1165
R30	MB	L	ii	1	2.94667e+07	22.7135	38.4335	286842	73.3133	0.999744	3.58644e+08	38.1165
R30	MB	M	ii	0	1.06667e+07	37.8316	23.7319	71.7749	199299	0.000360006	2.49214e+08	38.1165
R30	MB	N	ii			37.8655	30.138	70.45	6353.62	0.0109666		38.1165
R30	MB	O	ii	1	50200000	23.2856		209585	0	1	2.61981e+08	38.1165
R30	MB	P	ii	0	54800000	36.2518	21.3075	170.735	734262	0.000232471	9.1804e+08	38.1165
R30	MB	Q	ii	0.125	1600000	39.1815	29.2982	34.2273	9981.97	0.00341719	1.25202e+07	38.1165
R30	MB	R	ii	0	0	37.7577	30.5806	74.7421	5007.69	0.014706	6.35304e+06	38.1165
R30	MB	S	ii	1	37400000	24.0022	37.6853	141462	109.64	0.999226	1.76964e+08	38.1165
R30	MB	T	ii	0	5.22667e+07	38.2225		57.9224	0	1	72403	38.1165
R30	MB	U	ii			36.7276	24.7657	131.516	114292	0.00114938		38.1165
R30	MB	V	ii	0	2520000	36.0644	22.0282	189.227	498292	0.000379608	6.23101e+08	38.1165
R30	Pouch	A	ii	1	200000000	21.1492		676586	0	1	8.45732e+08	36.6998
R30	Pouch	B	ii	0.788732	2.36667e+07	25.4891	27.0918	62575.4	32704.9	0.656751	1.191e+08	36.6998
R30	Pouch	C	ii	1	6.32667e+07	23.0413	38.271	239639	80.0097	0.999666	2.99649e+08	36.6998
R30	Pouch	D	ii	1	5.08667e+07	24.1019	38.5451	133935	69.0431	0.999485	1.67506e+08	36.6998
R30	Pouch	E	ii	1	7.45333e+07	20.7747	22.585	830912	369323	0.692291	1.50029e+09	36.6998
R30	Pouch	F	ii	0	2.86667e+07	37.4689	24.7765	87.5748	113625	0.000770144	1.4214e+08	36.6998
R30	Pouch	G	ii	0	15600000	38.3152	25.5102	55.0493	76574.2	0.000718385	9.57866e+07	36.6998
R30	Pouch	H	ii	0.992415	5.27333e+06	22.849	39.1372	266294	50.2107	0.999811	3.3293e+08	36.6998
R30	MB P1	A	ii	0	86000000		23.1791	0	268308	0	3.35384e+08	37.5526	35.8728
R30	MB P1	B	ii	0	1.83667e+08	37.1786	26.976	102.693	34808.4	0.00294156	4.36388e+07	37.5526	35.8728
R30	MB P1	c	ii	0	50000000	37.1677	29.6517	103.307	8253.47	0.012362	1.0446e+07	37.5526	35.8728
R30	MB P1	D	ii	0	21000000	39.0507	32.8392	36.7738	1486.06	0.0241483	1.90354e+06	37.5526	35.8728
R30	MB P1	E	ii	1	230000000	26.9764	36.0882	27674.5	258.859	0.990733	3.49167e+07	37.5526	35.8728
R30	MB P1	F	ii	0	1.66667e+06	38.2197	27.3609	58.0099	28299	0.0020457	3.54462e+07	37.5526	35.8728
R30	MB P1	G	ii	0	5.43333e+06		31.4019	0	3219.4	0	4.02425e+06	37.5526	35.8728
R30	MB P1	H	ii	0.398406	6.69333e+08	24.0156	22.8396	140429	322068	0.303632	5.78121e+08	37.5526	35.8728
R30	MB P1	I	ii	0	9.16667e+07		27.1323	0	32000.5	0	4.00006e+07	37.5526	35.8728
R30	MB P1	J	ii	0	1.48667e+08	38.581	28.251	47.5804	17531.8	0.00270661	2.19742e+07	37.5526	35.8728
R30	MB P1	K	ii	1	1.57667e+08	24.274	35.6889	121865	320.864	0.997374	1.52732e+08	37.5526	35.8728
R30	MB P1	L	ii	0	1.24667e+08	37.2347	25.3614	99.5761	82954.4	0.00119893	1.03818e+08	37.5526	35.8728
R30	MB P1	M	ii	0.491379	6.18667e+08	24.8224	23.5513	90206.2	219626	0.291145	3.8729e+08	37.5526	35.8728
R30	MB P1	N	ii	0	1.54333e+07	38.4236	27.2462	51.8724	30099.5	0.0017204	3.76892e+07	37.5526	35.8728
R30	MB P1	O	ii	1	434000000	24.7461		94060	0	1	1.17575e+08	37.5526	35.8728
R30	MB P1	P	ii	0	2.57333e+08	38.5098	30.3204	49.4766	5759.87	0.00851673	7.26168e+06	37.5526	35.8728
R30	MB P1	Q	ii	0	1.93333e+08	37.3528	29.4785	93.3325	9059.24	0.0101974	1.14407e+07	37.5526	35.8728
R30	MB P1	R	ii	0	190000000		29.0124	0	11640.6	0	1.45507e+07	37.5526	35.8728
R30	MB P1	S	ii		0	33.4162		808.866	0	1	1.01108e+06	37.5526	35.8728
R30	MB P1	T	ii	0	33000000		30.8775	0	4268.64	0	5.33581e+06	37.5526	35.8728
R30	MB P1	U	ii	0	2.96667e+08		27.5708	0	25276.5	0	3.15956e+07	37.5526	35.8728
R30	MB P2	A	ii	0	1.49333e+08		28.399	0	16190.9	0	2.02386e+07	37.5741
R30	MB P2	B	ii	0	2.79333e+07		30.1594	0	6281.11	0	7.85139e+06	37.5741
R30	MB P2	c	ii	1	2.59333e+08	25.3088		69081.7	0	1	8.63521e+07	37.5741
R30	MB P2	D	ii	0.840206	2.58667e+08	24.9123	26.8571	85867.5	37107.2	0.698253	1.53718e+08	37.5741
R30	MB P2	E	ii	0.548315	2.96667e+08	27.733	26.5267	18273.2	44323.9	0.291918	7.82464e+07	37.5741
R30	MB P2	F	ii	0.449187	328000000	28.4523	25.5001	12315.5	76992.4	0.137899	1.11635e+08	37.5741
R30	MB P2	G	ii	0	164000000	37.1334	27.5449	105.267	25632.3	0.00409001	3.21719e+07	37.5741
R30	MB P2	H	ii	1	182000000	25.7742	37.6804	53517.1	109.929	0.99795	6.70338e+07	37.5741
R30	MB P2	I	ii	1	2.69333e+08	27.0496		26584.6	0	1	3.32308e+07	37.5741
R30	MB P2	J	ii	0	2.13333e+07	37.6792	22.9437	78.0318	304525	0.000256175	3.80754e+08	37.5741
R30	MB P2	K	ii	0	4.56667e+08	35.829	23.9549	215.301	176765	0.00121653	2.21225e+08	37.5741
R30	MB P2	L	ii	1	530000000	24.3486	37.867	116980	99.4296	0.999151	1.4635e+08	37.5741
R30	MB P2	M	ii	1	1.61333e+08	28.435	35.6786	12433.1	322.656	0.974705	1.59447e+07	37.5741
R30	MB P2	N	ii	0	1.68667e+08	37.2852	30.1431	96.8595	6336.46	0.0150559	8.04165e+06	37.5741
R30	MB P2	O	ii		0	38.0038						37.5741
R30	MB P2	P	ii	1	388000000	24.9515						37.5741
R30	MB P2	Q	ii	1	1.13333e+07	27.4245		21643.5	0	1	2.70544e+07	37.5741
R30	MB P2	R	ii	1	2.51333e+08	27.6454	37.7768	19173.1	104.372	0.994586	2.40968e+07	37.5741
R30	MB P2	S	ii	1	4.98667e+08	23.5789	36.033	178438	266.652	0.998508	2.23381e+08	37.5741
R30	MB P2	T	ii	0	7.13333e+06	38.5755	30.8267	47.7234	4386.81	0.0107618	5.54317e+06	37.5741
R30	MB P2	U	ii	0	4600000		34.0597	0	770.751	0	963439	37.5741
R30	MB P3	A	ii	1	1.83333e+08	25.596	37.9618	59011	94.4866	0.998401	7.38819e+07	35.4422	32.9711
R30	MB P3	B	ii		0	35.4526		264.685	0	1	330856	35.4422	32.9711
R30	MB P3	c	ii	1	3.17333e+08	21.353	32.7786	605012	1535.26	0.997469	7.58184e+08	35.4422	32.9711
R30	MB P3	D	ii	0	48200000		29.9393	0	7070.22	0	8.83777e+06	35.4422	32.9711
R30	MB P3	E	ii	1	586000000	20.7079	35.891	861893	287.825	0.999666	1.07773e+09	35.4422	32.9711
R30	MB P3	F	ii	0	1.41333e+07		23.4455	0	232487	0	2.90608e+08	35.4422	32.9711
R30	MB P3	G	ii	0.719388	5.22667e+08	23.1818	24.5006	221862	131803	0.627323	4.42081e+08	35.4422	32.9711
R30	MB P3	H	ii	1	3.63333e+08	38.8309						35.4422	32.9711
R30	MB P3	I	ii	0.998582	470000000	23.6249		173991	0	1	2.17488e+08	35.4422	32.9711
R30	MB P3	J	ii		0			0	0	#DIV/0!	0	35.4422	32.9711
R30	MB P3	K	ii	1	2.09333e+08	28.1875		14240.8	0	1	1.7801e+07	35.4422	32.9711
R30	MB P3	L	ii		0	32.3174		1477.94	0	1	1.84743e+06	35.4422	32.9711
R30	MB P3	M	ii	1	2.39333e+08	28.0551	39.2654	15313.8	46.8658	0.996949	1.92008e+07	35.4422	32.9711
R30	MB P3	N	ii		0	32.3553						35.4422	32.9711
R30	MB P3	O	ii	1	1.10667e+08	29.0317						35.4422	32.9711
R30	MB P3	P	ii	1	376000000	25.5447	38.8612	60696.6	58.2469	0.999041	7.59435e+07	35.4422	32.9711
R30	MB P3	Q	ii	1	3.10667e+08	24.8958						35.4422	32.9711
R30	MB P3	R	ii	0.993976	2.21333e+08	27.8962						35.4422	32.9711
R30	MB P3	S	ii	1	3.30667e+08	28.46						35.4422	32.9711
R30	MB P3	T	ii	0	78000000	37.0636	34.4095	109.377	638.556	0.146239	934917	35.4422	32.9711
R30	MB P3	U	ii	1	2.38667e+08	28.3204						35.4422	32.9711
R6	MB	A	ii		0	36.895	35.4875	119.979	408.523	0.227016	660627	36.1858	34.7595
R6	MB	B	ii		0	35.1731	30.9726	308.535	4990.56	0.0582241	6.62386e+06	36.1858	34.7595
R6	MB	c	ii	1	36800000	24.8799	35.7727	87403.2	348.782	0.996025	1.0969e+08	36.1858	34.7595
R6	MB	D	ii	0	1.30667e+07	35.6259	28.0239	240.683	25587.6	0.00931857	3.22854e+07	36.1858	34.7595
R6	MB	E	ii	0	13200000	35.0274	28.456	334.216	20138	0.0163253	2.55903e+07	36.1858	34.7595
R6	MB	F	ii	0.502664	7.50667e+07	24.0098	26.1122	140876	73836.8	0.656114	2.68392e+08	36.1858	34.7595
R6	MB	G	ii	1	68000000	22.2328	38.0121	373410	100.794	0.99973	4.66888e+08	36.1858	34.7595
R6	MB	H	ii	1	7.61333e+07	22.0313	35.4884	417037	408.329	0.999022	5.21807e+08	36.1858	34.7595
R6	MB	I	ii	0.431487	4.57333e+07	22.5027	24.5106	322005	179409	0.642195	6.26767e+08	36.1858	34.7595
R6	MB	J	ii	0	146667	34.6278	27.3138	416.138	37931	0.0108519	4.79339e+07	36.1858	34.7595
R6	MB	K	ii		0	36.31	36.3515	165.372	253.057	0.395221	523036	36.1858	34.7595
R6	MB	L	ii		0	37.118	32.6731	106.161	1944.35	0.0517728	2.56314e+06	36.1858	34.7595
R6	MB	M	ii		0	35.7144	35.8999	229.278	325.041	0.413621	692899	36.1858	34.7595
R6	MB	N	ii		0	38.0082	35.0378	65.1464	524.181	0.110544	736660	36.1858	34.7595
R6	MB	O	ii	1	54800000	23.3312	35.1994	204405	479.275	0.997661	2.56105e+08	36.1858	34.7595
R6	MB	P	ii	0.43038	31600000	25.8203	27.3293	52179.9	37605.4	0.581163	1.12232e+08	36.1858	34.7595
R6	MB	Q	ii	0	44800000	35.2983	26.2756	288.056	67440.5	0.00425309	8.46607e+07	36.1858	34.7595
R6	MB	R	ii	0.113821	16400000	32.0941	31.1148	1670.5	4612.47	0.265877	7.85371e+06	36.1858	34.7595
R6	MB	S	ii	1	4.45333e+07	23.9988	34.8837	141726	570.92	0.995988	1.77871e+08	36.1858	34.7595
R6	MB	T	ii	1	1.07067e+08	23.2552	35.2747	213112	459.677	0.997848	2.66965e+08	36.1858	34.7595
R6	MB	U	ii	0.338346	3.54667e+07	29.8263	28.5862	5795.96	18735.5	0.236266	3.06644e+07	36.1858	34.7595
R6	MB	V	ii		0	35.7928	33.7923	219.624	1045.51	0.173597	1.58142e+06	36.1858	34.7595
R6	Pouch	A	ii	0.273408	35600000	25.8535	27.7051	51238.3	30534.7	0.626592	1.02216e+08	36.6998	37.5138
R6	Pouch	B	ii	0	1.82667e+06	39.882	31.1513	23.307	4520.07	0.00512989	5.67923e+06	36.6998	37.5138
R6	Pouch	C	ii	1	142800000	20.9862		739864	0	1	9.24829e+08	36.6998	37.5138
R6	Pouch	D	ii	0.523596	5.93333e+07	24.0432	28.3221	138315	21689.7	0.864444	2.00006e+08	36.6998	37.5138
R6	Pouch	E	ii	1	400000000	20.4885	36.0032	972127	306.954	0.999684	1.21554e+09	36.6998	37.5138
R6	Pouch	F	ii	0	5.42667e+07		26.9002	0	47704.2	0	5.96303e+07	36.6998	37.5138
R6	Pouch	G	ii	0	77200000	36.4477	26.3724	153.341	63917.8	0.00239329	8.00889e+07	36.6998	37.5138
R6	Pouch	H	ii	0	38400000	36.2219	26.8002	173.565	50424.3	0.00343029	6.32473e+07	36.6998	37.5138
R6	MB P1	A	ii	0	3.72333e+07	38.0297	34.9015	64.3831	565.332	0.102242	787143	38.0824	36.1803
R6	MB P1	B	ii	0	1.70333e+07		36.0692	0	295.925	0	369906	38.0824	36.1803
R6	MB P1	c	ii	0	2.61333e+08		31.1476	0	4529.32	0	5.66165e+06	38.0824	36.1803
R6	MB P1	D	ii	0	5000000		32.6974	0	1918.31	0	2.39788e+06	38.0824	36.1803
R6	MB P1	E	ii	0	3.13333e+07		34.3075	0	785.797	0	982246	38.0824	36.1803
R6	MB P1	F	ii		1.66667e+06	37.1927	31.2522	101.9	4274.2	0.0232857	5.47013e+06	38.0824	36.1803
R6	MB P1	G	ii	0	75000000		32.2108	0	2512.32	0	3.1404e+06	38.0824	36.1803
R6	MB P1	H	ii	0	133333		34.8351	0	586.511	0	733139	38.0824	36.1803
R6	MB P1	I	ii	0	24600000	37.4357	36.1548	89.1815	282.207	0.24013	464236	38.0824	36.1803
R6	MB P1	J	ii	0	2.26667e+07	38.0151	35.4137	64.9002	425.597	0.132315	613121	38.0824	36.1803
R6	MB P1	K	ii	0	2.93333e+07		33.0213	0	1603.03	0	2.00378e+06	38.0824	36.1803
R6	MB P1	L	ii	0.545064	6.21333e+08	22.2777	26.691	364305	53571.3	0.871801	5.22346e+08	38.0824	36.1803
R6	MB P1	M	ii		0		36.0295	0	302.511	0	378138	38.0824	36.1803
R6	MB P1	N	ii	0	3.90667e+07		33.5656	0	1185.54	0	1.48193e+06	38.0824	36.1803
R6	MB P1	O	ii	1	1.00667e+08	28.9088	38.1657	9587.6	92.5688	0.990437	1.21002e+07	38.0824	36.1803
R6	MB P1	P	ii	0	4.26667e+07		34.4032	0	745.183	0	931478	38.0824	36.1803
R6	MB P1	Q	ii	0	1.86667e+07	39.4068	35.5258	30.247	399.951	0.0703095	537747	38.0824	36.1803
R6	MB P1	R	ii	0.652516	424000000	25.9208	30.841	49379.4	5368.24	0.901946	6.84346e+07	38.0824	36.1803
R6	MB P1	S	ii	0	3.75333e+07		34.057	0	902.813	0	1.12852e+06	38.0824	36.1803
R6	MB P1	T	ii	0	2.35333e+07		36.0004	0	307.43	0	384288	38.0824	36.1803
R6	MB P1	U	ii	0	296000000	36.3772	29.9839	159.391	8633.58	0.0181271	1.09912e+07	38.0824	36.1803
R6	MB P2	A	ii	0	310000000	35.6927	29.3365	232.016	12360.6	0.0184248	1.57407e+07	38.7924	35.961
R6	MB P2	B	ii	0.445993	1.91333e+08	28.0298	30.9515	15527.9	5049.27	0.754618	2.57214e+07	38.7924	35.961
R6	MB P2	c	ii	0	8.73333e+07	35.9481	31.2088	201.685	4378.26	0.0440367	5.72493e+06	38.7924	35.961
R6	MB P2	D	ii	0	6.53333e+07		33.6008	0	1162.64	0	1.4533e+06	38.7924	35.961
R6	MB P2	E	ii	0	333333		33.8093	0	1035.74	0	1.29467e+06	38.7924	35.961
R6	MB P2	F	ii	0	48000000	37.7864	33.331	73.5748	1350.15	0.0516775	1.77966e+06	38.7924	35.961
R6	MB P2	G	ii	0	1.27333e+08	38.2994	31.4714	55.5297	3785.16	0.0144583	4.80086e+06	38.7924	35.961
R6	MB P2	H	ii	0.106762	3.74667e+07	36.9067	32.7981	119.205	1814.2	0.0616557	2.41675e+06	38.7924	35.961
R6	MB P2	I	ii	0.948179	476000000	24.0154	36.0727	140443	295.352	0.997901	1.75922e+08	38.7924	35.961
R6	MB P2	J	ii		0		35.4041	0	427.866	0	534832	38.7924	35.961
R6	MB P2	K	ii	0.934673	398000000	25.0751	33.1536	78529.3	1489.69	0.981383	1.00024e+08	38.7924	35.961
R6	MB P2	L	ii	0	7.06667e+07	35.8945	32.668	207.708	1949.84	0.0962702	2.69693e+06	38.7924	35.961
R6	MB P2	M	ii	0	4.46667e+07		34.3866	0	752.076	0	940095	38.7924	35.961
R6	MB P2	N	ii	0	6.46667e+07	36.2272	34.3134	173.061	783.192	0.180978	1.19532e+06	38.7924	35.961
R6	MB P2	O	ii		0	27.6152	36.9403	19493.8	182.589	0.99072	2.45955e+07	38.7924	35.961
R6	MB P2	P	ii		0		35.4509	0	416.893	0	521116	38.7924	35.961
R6	MB P2	Q	ii		0		35.5423	0	396.305	0	495381	38.7924	35.961
R6	MB P2	R	ii		0		35.7324	0	356.664	0	445830	38.7924	35.961
R6	MB P2	S	ii		0		33.4281	0	1279.44	0	1.59929e+06	38.7924	35.961
R6	MB P2	T	ii		0	37.6502	31.4378	79.2832	3856.21	0.0201457	4.91936e+06	38.7924	35.961
R6	MB P2	U	ii		0		34.7489	0	615.223	0	769029	38.7924	35.961
R6	MB P3	A	ii		0		33.0386	0	1587.72	0	1.98465e+06		36.9116
R6	MB P3	B	ii	0	3.93333e+07		37.4301	0	139.17	0	173962		36.9116
R6	MB P3	c	ii	0.718377	5.58667e+08	22.9481	27.1595	252204	41318.2	0.859233	3.66903e+08		36.9116
R6	MB P3	D	ii	0.995976	3.31333e+08	29.6453		6400.92	0	1	8.00114e+06		36.9116
R6	MB P3	E	ii	0.645933	1.39333e+08	28.1672	30.8937	14400.7	5213.67	0.734192	2.4518e+07		36.9116
R6	MB P3	F	ii		0	37.0525	36.7425	110.045	203.746	0.350697	392239		36.9116
R6	MB P3	G	ii		0		37.3368	0	146.56	0	183200		36.9116
R6	MB P3	H	ii	0.423143	386000000	29.7423	31.9453	6069.26	2910.67	0.675869	1.12249e+07		36.9116
R6	MB P3	I	ii	0.00662252	2.01333e+08		34.8838	0	570.888	0	713610		36.9116
R6	MB P3	J	ii		0		37.4542	0	137.322	0	171653		36.9116
R6	MB P3	K	ii	0	6.93333e+07		34.6963	0	633.448	0	791810		36.9116
R6	MB P3	L	ii	0	202000000		35.0902	0	509.181	0	636476		36.9116
R6	MB P3	M	ii		0		34.231	0	819.829	0	1.02479e+06		36.9116
R6	MB P3	N	ii	0	4.60667e+08		33.0662	0	1563.65	0	1.95456e+06		36.9116
R6	MB P3	O	ii	0	1.55333e+08		33.7102	0	1094.22	0	1.36777e+06		36.9116
R6	MB P3	P	ii	0	96000000		34.4741	0	716.446	0	895557		36.9116
R6	MB P3	Q	ii	0	182000000		39.0226	0	57.5669	0	71958.6		36.9116
R6	MB P3	R	ii	0	1.41333e+08		35.3385	0	443.716	0	554645		36.9116
R6	MB P3	S	ii	0.450382	8.73333e+07	31.6758	33.0277	2101.38	1597.38	0.568131	4.62346e+06		36.9116
R6	MB P3	T	ii	0.525659	4.80667e+08		27.3342	0	37504.2	0	4.68802e+07		36.9116
R6	MB P3	U	ii	0.456274	1.75333e+08	33.253	32.9294	884.618	1686.78	0.344022	3.21425e+06		36.9116
R30	MB	A	iii	0.753555	21100000
R30	MB	B	iii	0.213759	2.71333e+07
R30	MB	c	iii	0	2.35333e+07
R30	MB	D	iii	0	280000
R30	MB	E	iii
R30	MB	F	iii	0	22100000
R30	MB	G	iii	0	1.34667e+07
R30	MB	H	iii	0	20000000
R30	MB	I	iii	1	15900000
R30	MB	J	iii
R30	MB	K	iii
R30	MB	L	iii	1	2.94667e+07
R30	MB	M	iii	0	1.06667e+07
R30	MB	N	iii
R30	MB	O	iii	1	50200000
R30	MB	P	iii	0	54800000
R30	MB	Q	iii	0.125	1600000
R30	MB	R	iii	0	0
R30	MB	S	iii	1	37400000
R30	MB	T	iii	0	5.22667e+07
R30	MB	U	iii
R30	MB	V	iii	0	2520000
R30	Pouch	A	iii	1	200000000
R30	Pouch	B	iii	0.788732	2.36667e+07
R30	Pouch	C	iii	1	6.32667e+07
R30	Pouch	D	iii	1	5.08667e+07
R30	Pouch	E	iii	1	7.45333e+07
R30	Pouch	F	iii	0	2.86667e+07
R30	Pouch	G	iii	0	15600000
R30	Pouch	H	iii	0.992415	5.27333e+06
R30	MB P1	A	iii	0	86000000		23.4429	0	232809	0	2.91012e+08	35.243	38.6494
R30	MB P1	B	iii	0	1.83667e+08	37.0333	26.91	111.212	36066.1	0.00307409	4.52217e+07	35.243	38.6494
R30	MB P1	c	iii	0	50000000	36.3119	29.6356	165.199	8325.03	0.0194576	1.06128e+07	35.243	38.6494
R30	MB P1	D	iii	0	21000000	25.2253	27.7784	72317.2	22606.5	0.761845	1.18655e+08	35.243	38.6494
R30	MB P1	E	iii	1	230000000	26.9496	37.8495	28083.5	100.372	0.996439	3.52298e+07	35.243	38.6494
R30	MB P1	F	iii	0	1.66667e+06	37.5417	28.8557	84.1433	12664.1	0.00660039	1.59353e+07	35.243	38.6494
R30	MB P1	G	iii	0	5.43333e+06	36.7647	31.3493	128.862	3311.9	0.0374516	4.30095e+06	35.243	38.6494
R30	MB P1	H	iii	0.398406	6.69333e+08	23.8354	23.0591	155014	286201	0.351334	5.5152e+08	35.243	38.6494
R30	MB P1	I	iii	0	9.16667e+07	37.1689	27.8164	103.238	22148.9	0.00463946	2.78152e+07	35.243	38.6494
R30	MB P1	J	iii	0	1.48667e+08	36.7132	29.0609	132.556	11340.7	0.0115535	1.43415e+07	35.243	38.6494
R30	MB P1	K	iii	1	1.57667e+08	37.4942	37.7347	86.3655	106.766	0.447185	241414	35.243	38.6494
R30	MB P1	L	iii	0	1.24667e+08	36.2523	26.0679	170.693	56729.1	0.00299988	7.11247e+07	35.243	38.6494
R30	MB P1	M	iii	0.491379	6.18667e+08	24.7577	24.1133	93464.1	162334	0.365382	3.19748e+08	35.243	38.6494
R30	MB P1	N	iii	0	1.54333e+07	35.9217	27.515	204.629	26047.7	0.00779469	3.28154e+07	35.243	38.6494
R30	MB P1	O	iii	1	434000000	24.0451		138171	0	1	1.72714e+08	35.243	38.6494
R30	MB P1	P	iii	0	2.57333e+08		29.21	0	10466.9	0	1.30836e+07	35.243	38.6494
R30	MB P1	Q	iii	0	1.93333e+08		29.1722	0	10681.4	0	1.33518e+07	35.243	38.6494
R30	MB P1	R	iii	0	190000000		27.7878	0	22492.7	0	2.81159e+07	35.243	38.6494
R30	MB P1	S	iii		0	35.4154		270.145	0	1	337681	35.243	38.6494
R30	MB P1	T	iii	0	33000000		31.0955	0	3796.17	0	4.74521e+06	35.243	38.6494
R30	MB P1	U	iii	0	2.96667e+08	36.0421	26.478	191.548	45499.9	0.00419219	5.71144e+07	35.243	38.6494
R30	MB P2	A	iii	0	1.49333e+08	37.7597	27.294	74.6615	29335.2	0.00253865	3.67624e+07	37.902	38.5418
R30	MB P2	B	iii	0	2.79333e+07	36.3099	29.7074	165.385	8009.89	0.0202299	1.02191e+07	37.902	38.5418
R30	MB P2	c	iii	1	2.59333e+08	24.7507	37.6891	93826.7	109.419	0.998835	1.1742e+08	37.902	38.5418
R30	MB P2	D	iii	0.840206	2.58667e+08	24.8241	26.4636	90119.7	45852.7	0.662779	1.69966e+08	37.902	38.5418
R30	MB P2	E	iii	0.548315	2.96667e+08	27.4106	26.0606	21808.8	56952.3	0.276898	9.84514e+07	37.902	38.5418
R30	MB P2	F	iii	0.449187	328000000	28.0905	24.9254	15019.1	104883	0.125262	1.49877e+08	37.902	38.5418
R30	MB P2	G	iii	0	164000000	38.6527	26.9342	45.7447	35598.6	0.00128337	4.45554e+07	37.902	38.5418
R30	MB P2	H	iii	1	182000000	25.7104		55420.9	0	1	6.92762e+07	37.902	38.5418
R30	MB P2	I	iii	1	2.69333e+08	26.5279		35393	0	1	4.42413e+07	37.902	38.5418
R30	MB P2	J	iii	0	2.13333e+07	34.6232	22.6346	417.169	359609	0.00115872	4.50033e+08	37.902	38.5418
R30	MB P2	K	iii	0	4.56667e+08	34.314	23.1493	494.283	272640	0.00180967	3.41417e+08	37.902	38.5418
R30	MB P2	L	iii	1	530000000	24.062		136900	0	1	1.71124e+08	37.902	38.5418
R30	MB P2	M	iii	1	1.61333e+08	28.1254	36.9038	14734.3	166.925	0.988798	1.86266e+07	37.902	38.5418
R30	MB P2	N	iii	0	1.68667e+08	35.7765	29.2559	221.599	10211.6	0.0212397	1.30415e+07	37.902	38.5418
R30	MB P2	O	iii		0	35.0613	36.2945	328.055	231.67	0.5861	699657	37.902	38.5418
R30	MB P2	P	iii	1	388000000	25.0345	35.2962	80298.7	396.339	0.995088	1.00869e+08	37.902	38.5418
R30	MB P2	Q	iii	1	1.13333e+07	26.9263		28444.9	0	1	3.55562e+07	37.902	38.5418
R30	MB P2	R	iii	1	2.51333e+08	27.0999		25860.9	0	1	3.23261e+07	37.902	38.5418
R30	MB P2	S	iii	1	4.98667e+08	23.3096		206846	0	1	2.58558e+08	37.902	38.5418
R30	MB P2	T	iii	0	7.13333e+06		30.2358					37.902	38.5418
R30	MB P2	U	iii	0	4600000	39.4367	33.0548	29.7553	1323.28	0.0219915	1.6913e+06	37.902	38.5418
R30	MB P3	A	iii	1	1.83333e+08	26.8001		30484.1	0	1	3.81051e+07		35.666
R30	MB P3	B	iii		0		35.049	0	452.691	0	565864		35.666
R30	MB P3	c	iii	1	3.17333e+08	22.9546	33.9075	251315	836.492	0.996683	3.15189e+08		35.666
R30	MB P3	D	iii	0	48200000		31.1783						35.666
R30	MB P3	E	iii	1	586000000	21.7373	35.0423	490025	454.341	0.999074	6.131e+08		35.666
R30	MB P3	F	iii	0	1.41333e+07	36.9069	23.4157	119.196	236241	0.000504298	2.9545e+08		35.666
R30	MB P3	G	iii	0.719388	5.22667e+08	24.4254	25.2301	112152	89028.1	0.557471	2.51475e+08		35.666
R30	MB P3	H	iii	1	3.63333e+08	33.2531		884.549	0	1	1.10569e+06		35.666
R30	MB P3	I	iii	0.998582	470000000	24.281	36.6241	121403	194.031	0.998404	1.51996e+08		35.666
R30	MB P3	J	iii		0	34.9067		357.098	0	1	446373		35.666
R30	MB P3	K	iii	1	2.09333e+08	28.2831	36.9516	13513.6	162.692	0.988104	1.70954e+07		35.666
R30	MB P3	L	iii		0	33.2635	35.6813	879.53	322.181	0.731898	1.50214e+06		35.666
R30	MB P3	M	iii	1	2.39333e+08	27.2266	37.5531	24124.8	117.72	0.995144	3.03031e+07		35.666
R30	MB P3	N	iii		0	32.8059		1130.53	0	1	1.41316e+06		35.666
R30	MB P3	O	iii	1	1.10667e+08	28.4514	38.7722	12321.6	61.1047	0.995065	1.54784e+07		35.666
R30	MB P3	P	iii	1	376000000	26.3033	37.09	40034.3	151.015	0.996242	5.02316e+07		35.666
R30	MB P3	Q	iii	1	3.10667e+08	26.0333		46424.1	0	1	5.80301e+07		35.666
R30	MB P3	R	iii	0.993976	2.21333e+08	26.9818		27591.5	0	1	3.44894e+07		35.666
R30	MB P3	S	iii	1	3.30667e+08	26.2994		40119.2	0	1	5.0149e+07		35.666
R30	MB P3	T	iii	0	78000000		30.115	0	6432.92	0	8.04115e+06		35.666
R30	MB P3	U	iii	1	2.38667e+08	25.0105		81362.8	0	1	1.01704e+08		35.666
R6	MB	A	iii		0
R6	MB	B	iii		0
R6	MB	c	iii	1	36800000
R6	MB	D	iii	0	1.30667e+07
R6	MB	E	iii	0	13200000
R6	MB	F	iii	0.502664	7.50667e+07
R6	MB	G	iii	1	68000000
R6	MB	H	iii	1	7.61333e+07
R6	MB	I	iii	0.431487	4.57333e+07
R6	MB	J	iii	0	146667
R6	MB	K	iii		0
R6	MB	L	iii		0
R6	MB	M	iii		0
R6	MB	N	iii		0
R6	MB	O	iii	1	54800000
R6	MB	P	iii	0.43038	31600000
R6	MB	Q	iii	0	44800000
R6	MB	R	iii	0.113821	16400000
R6	MB	S	iii	1	4.45333e+07
R6	MB	T	iii	1	1.07067e+08
R6	MB	U	iii	0.338346	3.54667e+07
R6	MB	V	iii		0
R6	Pouch	A	iii	0.273408	35600000
R6	Pouch	B	iii	0	1.82667e+06
R6	Pouch	C	iii	1	142800000
R6	Pouch	D	iii	0.523596	5.93333e+07
R6	Pouch	E	iii	1	400000000
R6	Pouch	F	iii	0	5.42667e+07
R6	Pouch	G	iii	0	77200000
R6	Pouch	H	iii	0	38400000
R6	MB P1	A	iii	0	3.72333e+07	38.7961	33.0216	42.2852	1602.73	0.025705	2.05627e+06	35.0436	34.3798
R6	MB P1	B	iii	0	1.70333e+07	35.7214	33.2062	228.395	1446.91	0.136331	2.09413e+06	35.0436	34.3798
R6	MB P1	c	iii	0	2.61333e+08	34.9681	30.2904	345.258	7284.32	0.0452526	9.53697e+06	35.0436	34.3798
R6	MB P1	D	iii	0	5000000	36.3313	32.0113	163.449	2806.04	0.0550428	3.71186e+06	35.0436	34.3798
R6	MB P1	E	iii	0	3.13333e+07		32.6704	0	1947.2	0	2.434e+06	35.0436	34.3798
R6	MB P1	F	iii		1.66667e+06	37.46	30.4333	88.0002	6729.62	0.0129078	8.52202e+06	35.0436	34.3798
R6	MB P1	G	iii	0	75000000	35.5521	31.4222	250.624	3889.82	0.0605308	5.17555e+06	35.0436	34.3798
R6	MB P1	H	iii	0	133333	35.9916	33.098	196.935	1536.27	0.113624		35.0436	34.3798
R6	MB P1	I	iii	0	24600000	35.274	33.2763	291.933	1391.74	0.173391	2.10459e+06	35.0436	34.3798
R6	MB P1	J	iii	0	2.26667e+07		33.1465	0	1495.56	0	1.86945e+06	35.0436	34.3798
R6	MB P1	K	iii	0	2.93333e+07	35.0333	32.0047	333.131	2816.37	0.105772	3.93688e+06	35.0436	34.3798
R6	MB P1	L	iii	0.545064	6.21333e+08	22.0869	25.5438	404514	101180	0.799919	6.32118e+08	35.0436	34.3798
R6	MB P1	M	iii		0	35.4477	34.1127	265.401	875.384	0.232647	1.42598e+06	35.0436	34.3798
R6	MB P1	N	iii	0	3.90667e+07	36.5322	32.7737	146.398	1838.89	0.0737414	2.48161e+06	35.0436	34.3798
R6	MB P1	O	iii	1	1.00667e+08	28.4623	34.3214	12248.5	779.747	0.940149	1.62853e+07	35.0436	34.3798
R6	MB P1	P	iii	0	4.26667e+07	34.874	32.6574	363.562	1961.36	0.156376	2.90615e+06	35.0436	34.3798
R6	MB P1	Q	iii	0	1.86667e+07	34.5447	33.5962	435.535	1165.55	0.272025	2.00136e+06	35.0436	34.3798
R6	MB P1	R	iii	0.652516	424000000	26.0006	29.8063	47266	9526.63	0.832256	7.09908e+07	35.0436	34.3798
R6	MB P1	S	iii	0	3.75333e+07	37.2172	32.1231	100.539	2637.38	0.0367211	3.4224e+06	35.0436	34.3798
R6	MB P1	T	iii	0	2.35333e+07	34.9431	34.2346	350.025	818.185	0.299625	1.46026e+06	35.0436	34.3798
R6	MB P1	U	iii	0	296000000	34.1221	28.5759	549.151	18842.7	0.0283186	2.42398e+07	35.0436	34.3798
R6	MB P2	A	iii	0	310000000	36.6084	28.6726	140.403	17858.9	0.00780044	2.24992e+07	38.2378	37.431
R6	MB P2	B	iii	0.445993	1.91333e+08	28.7677	30.8541	10358.9	5329.56	0.660289	1.96106e+07	38.2378	37.431
R6	MB P2	c	iii	0	8.73333e+07	37.3065	30.575	95.7321	6221.34	0.0151545	7.89634e+06	38.2378	37.431
R6	MB P2	D	iii	0	6.53333e+07		33.4813					38.2378	37.431
R6	MB P2	E	iii	0	333333	35.3066	34.0792	286.752	891.791	0.24331	1.47318e+06	38.2378	37.431
R6	MB P2	F	iii	0	48000000	36.8149	32.9247	125.368	1691.18	0.0690141	2.27069e+06	38.2378	37.431
R6	MB P2	G	iii	0	1.27333e+08	36.5268	31.3878	146.827	3964.49	0.0357129	5.13915e+06	38.2378	37.431
R6	MB P2	H	iii	0.106762	3.74667e+07	34.0778	32.0777	562.665	2704.67	0.172209	4.08417e+06	38.2378	37.431
R6	MB P2	I	iii	0.948179	476000000	24.429	37.5141	111936	132.844	0.998815	1.40086e+08	38.2378	37.431
R6	MB P2	J	iii		0	37.5774	35.7822	82.5132	346.952	0.19213	536832	38.2378	37.431
R6	MB P2	K	iii	0.934673	398000000	25.4379	32.7683	64356.6	1844.36	0.97214	8.27512e+07	38.2378	37.431
R6	MB P2	L	iii	0	7.06667e+07		32.2631	0	2440.48	0	3.05059e+06	38.2378	37.431
R6	MB P2	M	iii	0	4.46667e+07		34.2964	0	790.642	0	988302	38.2378	37.431
R6	MB P2	N	iii	0	6.46667e+07		33.5543	0	1192.95	0	1.49119e+06	38.2378	37.431
R6	MB P2	O	iii		0	27.6932	36.3132	18676.5	258.495	0.986348	2.36687e+07	38.2378	37.431
R6	MB P2	P	iii		0	39.4718	35.1062	29.1879	504.697	0.0546708	667356	38.2378	37.431
R6	MB P2	Q	iii		0	38.4247	34.1451	51.8409	859.779	0.0568668	1.13953e+06	38.2378	37.431
R6	MB P2	R	iii		0	36.3042	34.2079	165.901	830.402	0.166516	1.24538e+06	38.2378	37.431
R6	MB P2	S	iii		0		33.2049	0	1447.93	0	1.80991e+06	38.2378	37.431
R6	MB P2	T	iii		0	37.7261	30.1583	76.0479	7837.72	0.00960957	9.89221e+06	38.2378	37.431
R6	MB P2	U	iii		0	36.7349	34.2529	130.989	809.91	0.139217	1.17612e+06	38.2378	37.431
R6	MB P3	A	iii		0	39.891	32.98	23.1924	1640.14	0.0139433	2.07917e+06		36.3204
R6	MB P3	B	iii	0	3.93333e+07		37.995	0	101.754	0			36.3204
R6	MB P3	c	iii	0.718377	5.58667e+08	23.7348	27.229	163811	39755.5	0.804705	2.54459e+08		36.3204
R6	MB P3	D	iii	0.995976	3.31333e+08	35.4022	38.8063	272.099	64.8983	0.807422	421247		36.3204
R6	MB P3	E	iii	0.645933	1.39333e+08	28.5746	30.3215	11516.5	7160	0.616631	2.33456e+07		36.3204
R6	MB P3	F	iii		0	37.4131	38.8104	90.2939	64.7512	0.582372	193806		36.3204
R6	MB P3	G	iii		0		36.4941	0	233.828	0	292285		36.3204
R6	MB P3	H	iii	0.423143	386000000	29.9684	31.5654	5361.18	3592.84	0.598746	1.11925e+07		36.3204
R6	MB P3	I	iii	0.00662252	2.01333e+08	37.3767	33.8566	92.1165	1008.94	0.0836623	1.37631e+06		36.3204
R6	MB P3	J	iii		0		36.5147	0	231.166	0	288958		36.3204
R6	MB P3	K	iii	0	6.93333e+07		33.9775	0	943.523	0	1.1794e+06		36.3204
R6	MB P3	L	iii	0	202000000		33.3892	0	1307.31	0	1.63414e+06		36.3204
R6	MB P3	M	iii		0	36.5441	35.3748	145.442	434.875	0.250625	725396		36.3204
R6	MB P3	N	iii	0	4.60667e+08	36.4781	32.9065	150.805	1708.38	0.0811138	2.32398e+06		36.3204
R6	MB P3	O	iii	0	1.55333e+08		33.466						36.3204
R6	MB P3	P	iii	0	96000000		33.7948						36.3204
R6	MB P3	Q	iii	0	182000000		37.1569						36.3204
R6	MB P3	R	iii	0	1.41333e+08		34.0304						36.3204
R6	MB P3	S	iii	0.450382	8.73333e+07	32.2088	32.2419	1568.64	2469.38	0.388468	5.04753e+06		36.3204
R6	MB P3	T	iii	0.525659	4.80667e+08	23.7733	26.8244	160385	49752.6	0.763238	2.62672e+08		36.3204
R6	MB P3	U	iii	0.456274	1.75333e+08	33.9766	32.8295	594.781	1782.87	0.250155	2.97207e+06		36.3204
R30	MB	A	iv	0.753555	21100000
R30	MB	B	iv	0.213759	2.71333e+07
R30	MB	c	iv	0	2.35333e+07
R30	MB	D	iv	0	280000
R30	MB	E	iv
R30	MB	F	iv	0	22100000
R30	MB	G	iv	0	1.34667e+07
R30	MB	H	iv	0	20000000
R30	MB	I	iv	1	15900000
R30	MB	J	iv
R30	MB	K	iv
R30	MB	L	iv	1	2.94667e+07
R30	MB	M	iv	0	1.06667e+07
R30	MB	N	iv
R30	MB	O	iv	1	50200000
R30	MB	P	iv	0	54800000
R30	MB	Q	iv	0.125	1600000
R30	MB	R	iv	0	0
R30	MB	S	iv	1	37400000
R30	MB	T	iv	0	5.22667e+07
R30	MB	U	iv
R30	MB	V	iv	0	2520000
R30	Pouch	A	iv	1	200000000
R30	Pouch	B	iv	0.788732	2.36667e+07
R30	Pouch	C	iv	1	6.32667e+07
R30	Pouch	D	iv	1	5.08667e+07
R30	Pouch	E	iv	1	7.45333e+07
R30	Pouch	F	iv	0	2.86667e+07
R30	Pouch	G	iv	0	15600000
R30	Pouch	H	iv	0.992415	5.27333e+06
R30	MB P1	A	iv	0	86000000	37.452	23.975	88.3868	174873	0.00050518	2.18701e+08	35.243	38.6494
R30	MB P1	B	iv	0	1.83667e+08	36.0874	26.5209	186.85	44462.9	0.00418479	5.58121e+07	35.243	38.6494
R30	MB P1	c	iv	0	50000000		30.3204	0	5759.86	0	7.19983e+06	35.243	38.6494
R30	MB P1	D	iv	0	21000000	34.8836	27.842	361.641	21846.7	0.016284	2.77604e+07	35.243	38.6494
R30	MB P1	E	iv	1	230000000	26.4279	35.9515	37389.4	278.61	0.992604	4.7085e+07	35.243	38.6494
R30	MB P1	F	iv	0	1.66667e+06	35.4362	28.645	267.075	14183.7	0.0184817	1.80635e+07	35.243	38.6494
R30	MB P1	G	iv	0	5.43333e+06	37.1161	31.4388	106.274	3156.11	0.0325756	4.07798e+06	35.243	38.6494
R30	MB P1	H	iv	0.398406	6.69333e+08	24.0652	32.1175	136655	2190.91	0.984221	1.73558e+08	35.243	38.6494
R30	MB P1	I	iv	0	9.16667e+07	37.507	27.511	85.7596	26102.9	0.00327469	3.27358e+07	35.243	38.6494
R30	MB P1	J	iv	0	1.48667e+08	38.3318	28.9258	54.5487	12195.5	0.00445294	1.53126e+07	35.243	38.6494
R30	MB P1	K	iv	1	1.57667e+08	25.0273	38.0009	80614	92.5203	0.998854	1.00883e+08	35.243	38.6494
R30	MB P1	L	iv	0	1.24667e+08	36.3926	26.0703	158.05	56655.4	0.0027819	7.10169e+07	35.243	38.6494
R30	MB P1	M	iv	0.491379	6.18667e+08	24.6115	23.9255	101268	179591	0.360565	3.51075e+08	35.243	38.6494
R30	MB P1	N	iv	0	1.54333e+07	36.2072	27.2685	174.967	29741.1	0.00584861	3.73951e+07	35.243	38.6494
R30	MB P1	O	iv	1	434000000	24.0502	38.375	137781	75.6595	0.999451	1.72321e+08	35.243	38.6494
R30	MB P1	P	iv	0	2.57333e+08	35.9657	29.2379	199.748	10310.8	0.0190046	1.31381e+07	35.243	38.6494
R30	MB P1	Q	iv	0	1.93333e+08	38.0953	29.6153	62.1068	8416.63	0.007325	1.05984e+07	35.243	38.6494
R30	MB P1	R	iv	0	190000000	35.7113	28.5612	229.668	14837.4	0.015243	1.88339e+07	35.243	38.6494
R30	MB P1	S	iv		0	36.1011						35.243	38.6494
R30	MB P1	T	iv	0	33000000	35.6251	31.7757	240.785	2633.09	0.0837842	3.59234e+06	35.243	38.6494
R30	MB P1	U	iv	0	2.96667e+08	39.004	27.2203	37.726	30521.2	0.00123454	3.81986e+07	35.243	38.6494
R30	MB P2	A	iv	0	1.49333e+08	39.6652	27.776	26.2501	22635.6	0.00115834	2.83273e+07	37.902	38.5418
R30	MB P2	B	iv	0	2.79333e+07	37.7392	29.3444	75.5065	9736.53	0.00769529	1.2265e+07	37.902	38.5418
R30	MB P2	c	iv	1	2.59333e+08	24.4283	36.5748	111974	199.243	0.998224	1.40217e+08	37.902	38.5418
R30	MB P2	D	iv	0.840206	2.58667e+08	24.2557	26.4873	123095	45272	0.731111	2.10459e+08	37.902	38.5418
R30	MB P2	E	iv	0.548315	2.96667e+08	27.1915	26.0428	24593.7	57501.6	0.299575	1.02619e+08	37.902	38.5418
R30	MB P2	F	iv	0.449187	328000000	27.7328	25.0624	18275.3	97427.6	0.15795	1.44629e+08	37.902	38.5418
R30	MB P2	G	iv	0	164000000	36.2136	26.8689	174.357	36871.8	0.00470649	4.63077e+07	37.902	38.5418
R30	MB P2	H	iv	1	182000000	25.6013						37.902	38.5418
R30	MB P2	I	iv	1	2.69333e+08	26.3762	34.4699	38464.7	618.133	0.984184	4.88536e+07	37.902	38.5418
R30	MB P2	J	iv	0	2.13333e+07	35.7916	22.568	219.77	372720	0.000589292	4.66175e+08	37.902	38.5418
R30	MB P2	K	iv	0	4.56667e+08		23.2698	0	255540	0	3.19425e+08	37.902	38.5418
R30	MB P2	L	iv	1	530000000	23.752	37.12	162273	148.598	0.999085	2.03028e+08	37.902	38.5418
R30	MB P2	M	iv	1	1.61333e+08	27.7868	38.731	17741.7	62.4728	0.996491	2.22552e+07	37.902	38.5418
R30	MB P2	N	iv	0	1.68667e+08		29.4078	0	9410.44	0	1.17631e+07	37.902	38.5418
R30	MB P2	O	iv		0	36.2788	36.1015	168.226	257.012	0.395605	531547	37.902	38.5418
R30	MB P2	P	iv	1	388000000	25.024		80762.8	0	1	1.00953e+08	37.902	38.5418
R30	MB P2	Q	iv	1	1.13333e+07	26.9511						37.902	38.5418
R30	MB P2	R	iv	1	2.51333e+08	26.6992	36.5813	32218.4	198.548	0.993875	4.05212e+07	37.902	38.5418
R30	MB P2	S	iv	1	4.98667e+08	23.182						37.902	38.5418
R30	MB P2	T	iv	0	7.13333e+06		30.7196	0	4646.86	0	5.80857e+06	37.902	38.5418
R30	MB P2	U	iv	0	4600000	35.7562	33.1346	224.077	1267.72	0.150206	1.86474e+06	37.902	38.5418
R30	MB P3	A	iv	1	1.83333e+08	26.3419							35.666
R30	MB P3	B	iv		0	36.4576	36.2764	152.513	233.934	0.394654	483058		35.666
R30	MB P3	c	iv	1	3.17333e+08	22.3419	36.1291	351704	253.227	0.999281	4.39946e+08		35.666
R30	MB P3	D	iv	0	48200000		30.9754	0	4049.61	0	5.06202e+06		35.666
R30	MB P3	E	iv	1	586000000	21.3941	34.4523	591540	624.01	0.998946	7.40205e+08		35.666
R30	MB P3	F	iv	0	1.41333e+07		23.4514	0	231751	0	2.89689e+08		35.666
R30	MB P3	G	iv	0.719388	5.22667e+08	23.9265	25.2929	147461	86068.7	0.631445	2.91913e+08		35.666
R30	MB P3	H	iv	1	3.63333e+08	33.3781							35.666
R30	MB P3	I	iv	0.998582	470000000	24.3519		116769	0	1	1.45961e+08		35.666
R30	MB P3	J	iv		0	35.6738	36.2564	234.435	236.456	0.497854	588614		35.666
R30	MB P3	K	iv	1	2.09333e+08	27.9459	37.3555	16259.2	130.924	0.992012	2.04876e+07		35.666
R30	MB P3	L	iv		0	32.312		1482.33	0	1	1.85291e+06		35.666
R30	MB P3	M	iv	1	2.39333e+08	28.5151	37.2748	11898.4	136.733	0.988639	1.50439e+07		35.666
R30	MB P3	N	iv		0	32.2974							35.666
R30	MB P3	O	iv	1	1.10667e+08	28.5117		11921.1	0	1	1.49014e+07		35.666
R30	MB P3	P	iv	1	376000000	26.335	36.3764	39343.8	221.682	0.994397	4.94568e+07		35.666
R30	MB P3	Q	iv	1	3.10667e+08	25.5194							35.666
R30	MB P3	R	iv	0.993976	2.21333e+08	27.109	39.847	25732.1	34.276	0.99867	3.2208e+07		35.666
R30	MB P3	S	iv	1	3.30667e+08	30.2835							35.666
R30	MB P3	T	iv	0	78000000	36.9875	32.948	114.04	1401.55	0.0752448	1.89448e+06		35.666
R30	MB P3	U	iv	1	2.38667e+08	26.6527							35.666
R6	MB	A	iv		0
R6	MB	B	iv		0
R6	MB	c	iv	1	36800000
R6	MB	D	iv	0	1.30667e+07
R6	MB	E	iv	0	13200000
R6	MB	F	iv	0.502664	7.50667e+07
R6	MB	G	iv	1	68000000
R6	MB	H	iv	1	7.61333e+07
R6	MB	I	iv	0.431487	4.57333e+07
R6	MB	J	iv	0	146667
R6	MB	K	iv		0
R6	MB	L	iv		0
R6	MB	M	iv		0
R6	MB	N	iv		0
R6	MB	O	iv	1	54800000
R6	MB	P	iv	0.43038	31600000
R6	MB	Q	iv	0	44800000
R6	MB	R	iv	0.113821	16400000
R6	MB	S	iv	1	4.45333e+07
R6	MB	T	iv	1	1.07067e+08
R6	MB	U	iv	0.338346	3.54667e+07
R6	MB	V	iv		0
R6	Pouch	A	iv	0.273408	35600000
R6	Pouch	B	iv	0	1.82667e+06
R6	Pouch	C	iv	1	142800000
R6	Pouch	D	iv	0.523596	5.93333e+07
R6	Pouch	E	iv	1	400000000
R6	Pouch	F	iv	0	5.42667e+07
R6	Pouch	G	iv	0	77200000
R6	Pouch	H	iv	0	38400000
R6	MB P1	A	iv	0	3.72333e+07	35.6655	33.1263	235.508	1512.43	0.134735	2.18492e+06	35.0436	34.3798
R6	MB P1	B	iv	0	1.70333e+07	35.2069	33.6136	302.88	1154.42	0.207836	1.82163e+06	35.0436	34.3798
R6	MB P1	c	iv	0	2.61333e+08	37.6041	30.0316	81.3147	8408.24	0.0095782	1.06119e+07	35.0436	34.3798
R6	MB P1	D	iv	0	5000000	35.5981	31.8998	244.373	2984.9	0.0756743	4.03659e+06	35.0436	34.3798
R6	MB P1	E	iv	0	3.13333e+07	35.2091	33.1134	302.507	1523.29	0.165685	2.28225e+06	35.0436	34.3798
R6	MB P1	F	iv		1.66667e+06	35.8776	30.186	209.645	7718.22	0.0264441	9.90983e+06	35.0436	34.3798
R6	MB P1	G	iv	0	75000000	36.1326	31.1843	182.272	4438.09	0.0394497	5.77546e+06	35.0436	34.3798
R6	MB P1	H	iv	0	133333		32.5474	0	2084.7	0	2.60588e+06	35.0436	34.3798
R6	MB P1	I	iv	0	24600000	35.3673	34.3576	277.365	764.27	0.266278	1.30204e+06	35.0436	34.3798
R6	MB P1	J	iv	0	2.26667e+07	37.6156	32.9369	80.804	1679.86	0.0458939	2.20083e+06	35.0436	34.3798
R6	MB P1	K	iv	0	2.93333e+07	37.4776	32.3661	87.1557	2305.06	0.0364331	2.99027e+06	35.0436	34.3798
R6	MB P1	L	iv	0.545064	6.21333e+08	22.0294	25.56	417467	100279	0.806316	6.47182e+08	35.0436	34.3798
R6	MB P1	M	iv		0	36.3017	34.7675	166.13	608.907	0.214351	968796	35.0436	34.3798
R6	MB P1	N	iv	0	3.90667e+07	38.1486	32.1977	60.3168	2530.57	0.0232804	3.2386e+06	35.0436	34.3798
R6	MB P1	O	iv	1	1.00667e+08	26.0629	34.2294	45676.5	820.561	0.982352	5.81213e+07	35.0436	34.3798
R6	MB P1	P	iv	0	4.26667e+07	34.9543	33.5416	347.897	1201.38	0.224554	1.9366e+06	35.0436	34.3798
R6	MB P1	Q	iv	0	1.86667e+07	35.5387	33.6438	252.469	1135.2	0.181938	1.73459e+06	35.0436	34.3798
R6	MB P1	R	iv	0.652516	424000000	25.9636	29.9589	48234.4	8753.74	0.846394	7.12352e+07	35.0436	34.3798
R6	MB P1	S	iv	0	3.75333e+07	37.5983	32.1388	81.5703	2614.5	0.0302552	3.37009e+06	35.0436	34.3798
R6	MB P1	T	iv	0	2.35333e+07	36.4706	34.0821	151.43	890.356	0.145356	1.30223e+06	35.0436	34.3798
R6	MB P1	U	iv	0	296000000	35.1879	28.3404	306.046	21470.3	0.014054	2.72205e+07	35.0436	34.3798
R6	MB P2	A	iv	0	310000000	36.0558	28.8226	190.116	16434.4	0.0114359	2.07807e+07	38.2378	37.431
R6	MB P2	B	iv	0.445993	1.91333e+08	27.9514	30.9351	16210.3	5095.53	0.760839	2.66323e+07	38.2378	37.431
R6	MB P2	c	iv	0	8.73333e+07		30.4449	0	6686.5	0	8.35812e+06	38.2378	37.431
R6	MB P2	D	iv	0	6.53333e+07		34.0232	0	919.905	0	1.14988e+06	38.2378	37.431
R6	MB P2	E	iv	0	333333	38.1707	33.9722	59.5889	946.303	0.0592399	1.25736e+06	38.2378	37.431
R6	MB P2	F	iv	0	48000000	37.1064	32.7382	106.84	1875.41	0.0538985	2.47782e+06	38.2378	37.431
R6	MB P2	G	iv	0	1.27333e+08		31.4793	0	3768.57	0	4.71072e+06	38.2378	37.431
R6	MB P2	H	iv	0.106762	3.74667e+07	33.8651	32.6705	632.293	1947.12	0.24513	3.22427e+06	38.2378	37.431
R6	MB P2	I	iv	0.948179	476000000	24.2007	36.5098	126866	231.804	0.998176	1.58873e+08	38.2378	37.431
R6	MB P2	J	iv		0	37.1395	35.315	104.915	449.523	0.189227	693047	38.2378	37.431
R6	MB P2	K	iv	0.934673	398000000	25.241	32.7473	71697.4	1866	0.974634	9.19543e+07	38.2378	37.431
R6	MB P2	L	iv	0	7.06667e+07	35.6087	31.9904	242.956	2838.73	0.0788386	3.8521e+06	38.2378	37.431
R6	MB P2	M	iv	0	4.46667e+07	38.2371	34.5859	57.4587	673.408	0.0786172	913583	38.2378	37.431
R6	MB P2	N	iv	0	6.46667e+07	36.1332	33.4015	182.215	1298.44	0.123064	1.85082e+06	38.2378	37.431
R6	MB P2	O	iv		0	27.3179	36.9664	22946.8	179.963	0.992218	2.89085e+07	38.2378	37.431
R6	MB P2	P	iv		0		35.8377	0	336.445	0	420556	38.2378	37.431
R6	MB P2	Q	iv		0		34.1611	0	852.189	0	1.06524e+06	38.2378	37.431
R6	MB P2	R	iv		0	37.2653	35.3909	97.9224	431.002	0.185135	661155	38.2378	37.431
R6	MB P2	S	iv		0		33.3457	0	1339.17	0	1.67397e+06	38.2378	37.431
R6	MB P2	T	iv		0	36.9712	30.2716	115.062	7360.48	0.0153917	9.34443e+06	38.2378	37.431
R6	MB P2	U	iv		0	38.2428	34.5888	57.2783	672.308	0.0785078	911983	38.2378	37.431
R6	MB P3	A	iv		0		31.8445	0	3077.92	0	3.8474e+06		36.3204
R6	MB P3	B	iv	0	3.93333e+07			0	0		0		36.3204
R6	MB P3	c	iv	0.718377	5.58667e+08	23.2209	26.9901	217159	45386.2	0.82713	3.28182e+08		36.3204
R6	MB P3	D	iv	0.995976	3.31333e+08	35.4826	38.014	260.359	100.687	0.721125	451308		36.3204
R6	MB P3	E	iv	0.645933	1.39333e+08	28.503	30.4537	11978	6653.75	0.642882	2.32897e+07		36.3204
R6	MB P3	F	iv		0	36.7695		128.526	0	1	160657		36.3204
R6	MB P3	G	iv		0	37.0542	37.3187	109.943	148.038	0.426167	322477		36.3204
R6	MB P3	H	iv	0.423143	386000000	29.648	31.4071	6391.33	3922.35	0.619695	1.28921e+07		36.3204
R6	MB P3	I	iv	0.00662252	2.01333e+08		34.5029	0	705.1	0	881375		36.3204
R6	MB P3	J	iv		0	21.3328	36.0374	611771	301.19	0.999508	7.6509e+08		36.3204
R6	MB P3	K	iv	0	6.93333e+07	38.1517	33.6029	60.2155	1161.26	0.0492974	1.52684e+06		36.3204
R6	MB P3	L	iv	0	202000000	39.9743	34.3643	22.1559	761.429	0.028275	979481		36.3204
R6	MB P3	M	iv		0		33.7259	0	1084.75	0	1.35593e+06		36.3204
R6	MB P3	N	iv	0	4.60667e+08		32.6502	0	1969.2	0	2.46149e+06		36.3204
R6	MB P3	O	iv	0	1.55333e+08		34.2253	0	822.391	0	1.02799e+06		36.3204
R6	MB P3	P	iv	0	96000000		35.0147	0	530.932	0	663664		36.3204
R6	MB P3	Q	iv	0	182000000		37.296	0	149.909	0	187387		36.3204
R6	MB P3	R	iv	0	1.41333e+08		35.6402	0	375.367	0	469209		36.3204
R6	MB P3	S	iv	0.450382	8.73333e+07	32.8899	33.5826	1079.59	1174.37	0.478975	2.81745e+06		36.3204
R6	MB P3	T	iv	0.525659	4.80667e+08	23.3832	27.3826	198662	36510.7	0.84475	2.93966e+08		36.3204
R6	MB P3	U	iv	0.456274	1.75333e+08	31.9836	32.9823	1774.85	1638.1	0.520033	4.26619e+06		36.3204

## Sheet: Pouch
exp	rep	pas	nods	CFUpop	CFUprop	CThigh	CTlow	Cellhigh	Celllow	Prophigh	qPCRpop	CTRneg	CTMneg
30_6_1:9	i	0				21.6415	18.394	613510	5.32559e+06	0.1033	7.42387e+09		32.9985
30_6_1:9	i	1	289			18.4344	22.2104	3.4435e+06	642089	0.842841	5.10699e+09		36.1148
30_6_1:9	i	2	210			19.5401	22.5509	1.8998e+06	531652	0.781344	3.03932e+09		32.9985
30_6_1:9	i	3	90			20.984	22.0431	873784	704478	0.553637	1.97283e+09		32.9985
30_6_1:9	ii	0				21.1915	18.1768	781529	6.00701e+06	0.115125	8.48567e+09		34.1767
30_6_1:9	ii	1	289			18.7358	21.8086	2.92823e+06	802292	0.784938	4.66315e+09		37.5138
30_6_1:9	ii	2	210			19.3623	22.3583	2.09051e+06	591541	0.779444	3.35256e+09		34.1767
30_6_1:9	ii	3	90			20.3616	22.735	1.22126e+06	480070	0.717827	2.12666e+09		34.1767
30_6_1:1	i	0				19.0513	19.0529	2.47106e+06	3.69617e+06	0.400675	7.70903e+09		32.9985
30_6_1:1	i	1	205			21.9398	23.2307	522556	364735	0.588934	1.10911e+09		36.1148
30_6_1:1	i	2	179			21.8921	21.4294	536135	989961	0.351311	1.90762e+09		32.9985
30_6_1:1	i	3	126			21.9136	22.0663	529968	695488	0.432466	1.53182e+09		32.9985
30_6_1:1	ii	0				18.2076	18.6652	3.8903e+06	4.58217e+06	0.45917	1.05906e+10		34.1767
30_6_1:1	ii	1	205			21.6705	22.8705	603999	445327	0.575607	1.31166e+09		37.5138
30_6_1:1	ii	2	179			21.0436	21.8285	846226	793490	0.516081	2.04964e+09		34.1767
30_6_1:1	ii	3	126			21.7301	22.0917	584953	685776	0.460329	1.58841e+09		34.1767
R30_1:1	i	0		3.21667e+09	0.519862	19.2342	19.1937	1.93443e+06	2.28891e+06	0.458032	5.27917e+09
R30_1:1	i	1	163	8.66667e+08	0.915385	19.3108	21.951	1.85481e+06	519417	0.781227	2.96779e+09
R30_1:1	i	2	161	1.82667e+09	0.974453	19.3345	23.4728	1.83083e+06	229098	0.888783	2.5749e+09
R30_1:1	i	3	122	2640000000	1	17.8469	38.0014	4.14057e+06	92.4986	0.999978	5.17582e+09
R30_1:1	ii	0		3.21667e+09	0.519862	19.0477	18.6884	2.14277e+06	3.00384e+06	0.416346	6.43326e+09	37.2705
R30_1:1	ii	1	163	8.66667e+08	0.915385	19.309	22.5425	1.85667e+06	377869	0.830896	2.79317e+09	36.6998
R30_1:1	ii	2	161	1.82667e+09	0.974453	19.2665	23.2019	1.90049e+06	265037	0.877611	2.70691e+09	37.2705
R30_1:1	ii	3	122	2640000000	1	17.8223	38.5197	4.19678e+06	69.9917	0.999983	5.24606e+09	37.2705
R30_1:9	i	0		2.77222e+09	0.142285	21.0631	16.85	709331	8.07467e+06	0.0807527	1.098e+10
R30_1:9	i	1	108	3.73333e+08	0.75	21.4472	22.2452	574565	443407	0.564421	1.27246e+09
R30_1:9	i	2	237	2900000000	0.942529	18.4867	22.3568	2.91499e+06	417561	0.874702	4.16569e+09
R30_1:9	i	3	149	5080000000	0.994751	17.7655	25.6402	4.32952e+06	71403.2	0.983775	5.50115e+09
R30_1:9	ii	0		2.77222e+09	0.142285	20.3849	17.1929	1.029e+06	6.71454e+06	0.132885	9.67942e+09	37.2705
R30_1:9	ii	1	108	3.73333e+08	0.75	21.3717	21.8522	598852	547764	0.522278	1.43327e+09	36.6998
R30_1:9	ii	2	237	2900000000	0.942529	18.2516	22.514	3.31627e+06	383714	0.896293	4.62498e+09	37.2705
R30_1:9	ii	3	149	5080000000	0.994751	17.5955	25.6596	4.7527e+06	70660.6	0.98535	6.0292e+09	37.2705
R6_1:1	i	0		3.32222e+09	0.478261	19.7844	19.7199	1.43042e+06	2.55374e+06	0.359026	4.9802e+09		32.9985
R6_1:1	i	1	149	660000000	0.686869	19.5356	24.4179	1.63966e+06	188871	0.896709	2.28567e+09		36.1148
R6_1:1	i	2	272	2.78667e+09	0.966507	19.2576	24.611	1.90972e+06	169691	0.918395	2.59927e+09		32.9985
R6_1:1	i	3	90	2080000000	0.980769	19.422	27.149	1.74503e+06	41558	0.976739	2.23324e+09		32.9985
R6_1:1	ii	0		3.32222e+09	0.478261	20.0597	19.3291	1.22997e+06	3.17139e+06	0.279452	5.5017e+09	37.2705	34.1767
R6_1:1	ii	1	149	660000000	0.686869	19.3136	24.1541	1.852e+06	218610	0.894422	2.58827e+09	36.6998	37.5138
R6_1:1	ii	2	272	2.78667e+09	0.966507	19.3929	24.3816	1.77311e+06	192706	0.901972	2.45727e+09	37.2705	34.1767
R6_1:1	ii	3	90	2080000000	0.980769	18.6728	27.0361	2.63203e+06	44242.3	0.983469	3.34534e+09	37.2705	34.1767
R6_1:9	i	0		3.73889e+09	0.0861813	21.8022	19.076	472895	3.64899e+06	0.114728	5.15235e+09		32.9985
R6_1:9	i	1	264	9.46667e+08	0.478873	20.0466	22.8419	1.23882e+06	452460	0.732476	2.1141e+09		36.1148
R6_1:9	i	2	198	2.45333e+09	0.94837	17.909	23.0135	4.00188e+06	411393	0.906783	5.51659e+09		32.9985
R6_1:9	i	3	126	1.70667e+09	0.976562	18.0083	23.9762	3.78967e+06	241265	0.940147	5.03867e+09		32.9985
R6_1:9	ii	0		3.73889e+09	0.0861813	21.4382	18.2014	577406	5.92581e+06	0.0887877	8.12902e+09	37.2705	34.1767
R6_1:9	ii	1	264	9.46667e+08	0.478873	19.462	22.7166	1.70717e+06	484995	0.778759	2.7402e+09	36.6998	37.5138
R6_1:9	ii	2	198	2.45333e+09	0.94837	18.4541	23.1356	2.96764e+06	384473	0.885304	4.19014e+09	37.2705	34.1767
R6_1:9	ii	3	126	1.70667e+09	0.976562	18.0146	24.2902	3.77662e+06	202726	0.949055	4.97418e+09	37.2705	34.1767

## Sheet: MB
exp	tray	lin	rep	pas	nods	plants	CFUprop	CTR	CT30	CT6	CellR	Cell30	Cell6	PropR	Prop30	Prop6	CTRneg	CT30neg	CT6neg
R30	A	I	i	0			0.0998217	21.9623	18.6872	34.8278	433126	3.00564e+06	588.9	0.125932	0.873896	0.000171224	36.0324	34.7248	34.7631
R6	A	I	i	0			0.107468	22.2426	35.4121	35.0251	371399	372.378	527.891	0.997582	0.00100021	0.00141792	36.0324	34.7248	34.7631
R306	A	I	i	0				19.7352	20.0047	24.9955	1.46962e+06	1.47968e+06	137121	0.476156	0.479417	0.0444272	36.0324	34.7248	34.7631
R306	A	II	i	0				20.4975	20.6399	25.8764	967374	1.05145e+06	84146.3	0.460004	0.499983	0.0400131	36.0324	34.7248	34.7631
R306	A	III	i	0				20.2402	20.1533	35.9342	1.11399e+06	1.36607e+06	318.916	0.449121	0.550751	0.000128576	36.0324	34.7248	34.7631
R306	A	IV	i	0				20.7595	20.1191	35.0154	837865	1.39144e+06	530.727	0.375751	0.624011	0.000238011	36.0324	34.7248	34.7631
306_1	B	I	i	0				37.5469	19.4595	23.2234	83.904	1.98402e+06	366209	3.5699e-05	0.844152	0.155813	36.0324	34.7248	34.7631
306_1	B	II	i	0				35.6959	19.19	22.6711	231.617	2.29346e+06	497367	8.29854e-05	0.821717	0.1782	36.0324	34.7248	34.7631
306_1	B	III	i	0				36.3536	18.5914	21.9775	161.464	3.16463e+06	730596	4.14501e-05	0.812404	0.187554	36.0324	34.7248	34.7631
306_9	B	I	i	0				39.7157	21.927	20.7738	25.533	526174	1.4238e+06	1.30939e-05	0.269834	0.730153	36.0324	34.7248	34.7631
306_9	B	II	i	0				36.573	20.8128	20.9519	143.157	958102	1.28992e+06	6.36774e-05	0.426171	0.573765	36.0324	34.7248	34.7631
306_9	B	III	i	0				37.4186	21.3697	23.0462	90.0235	710092	404007	8.07973e-05	0.637317	0.362602	36.0324	34.7248	34.7631
R30	C	I	i	0			0.215385	21.5836	19.1349	34.4567	533147	2.36245e+06	723.424	0.184078	0.815673	0.000249774	36.0324	34.7248	34.7631
R6	C	I	i	0			0.0980392	21.3151	34.5816	21.1187	617728	582.098	1.17605e+06	0.344262	0.000324405	0.655414	36.0324	34.7248	34.7631
R306	C	I	i	0				20.3091	20.5681	22.8375	1.07271e+06	1.09284e+06	453549	0.409572	0.417258	0.17317	36.0324	34.7248	34.7631
R306	C	II	i	0				19.8673	20.8061	23.2424	1.36685e+06	961563	362374	0.507975	0.357353	0.134672	36.0324	34.7248	34.7631
R306	C	III	i	0				19.1322	20.6424	35.6059	2.04578e+06	1.05004e+06	382.57	0.660739	0.339137	0.000123561	36.0324	34.7248	34.7631
R306	C	IV	i	0				19.8438	21.005	23.8612	1.38457e+06	863996	257146	0.552565	0.344811	0.102624	36.0324	34.7248	34.7631
306_1	D	I	i	0					20.5325	22.4906	7.39351e+10	1.11402e+06	549712	0.999977	1.50672e-05	7.43489e-06	36.0324	34.7248	34.7631
306_1	D	II	i	0				36.6142	20.3177	22.4144	139.959	1.25046e+06	573449	7.67296e-05	0.685541	0.314382	36.0324	34.7248	34.7631
306_1	D	III	i	0				36.8709	20.0798	22.5135	121.572	1.42114e+06	542772	6.18991e-05	0.723583	0.276355	36.0324	34.7248	34.7631
306_9	D	I	i	0				36.0964	23.0564	21.6072	185.929	286617	897061	0.000157053	0.242103	0.75774	36.0324	34.7248	34.7631
306_9	D	II	i	0				35.3074	22.4361	21.201	286.623	400119	1.1236e+06	0.000188073	0.262545	0.737267	36.0324	34.7248	34.7631
306_9	D	III	i	0				34.7329	22.6278	22.4664	392.808	360918	557147	0.000427682	0.392961	0.606611	36.0324	34.7248	34.7631
R30	E	I	i	0			0.0976645	23.4477	18.8317	33.3142	191751	2.78096e+06	1362.8	0.0644743	0.935067	0.000458226	36.0324	34.7248	34.7631
R6	E	I	i	0			0.0903084	29.2468	35.2579	22.3062	7964.85	404.593	608872	0.0129039	0.000655485	0.986441	36.0324	34.7248	34.7631
R306	E	I	i	0				21.0119	19.2718	23.4953	729502	2.19477e+06	314970	0.225208	0.677557	0.0972359	36.0324	34.7248	34.7631
R306	E	II	i	0				21.1269	20.0272	24.0036	684917	1.46194e+06	237623	0.28724	0.613106	0.099654	36.0324	34.7248	34.7631
306_1	E	I	i	0				35.0164	20.5962	30.1786	336.234	1.07649e+06	7750.25	0.000310014	0.992544	0.00714587	36.0324	34.7248	34.7631
306_9	E	I	i	0				34.7386	21.832	23.4385	391.58	553767	325037	0.000445384	0.629857	0.369698	36.0324	34.7248	34.7631
306_1	F	II	i	0				22.7781	19.233	26.7616	276865	2.24108e+06	51515.5	0.107752	0.872199	0.0200491	36.0324	34.7248	34.7631
306_1	F	III	i	0				36.1926	21.6217	22.9184	176.373	620092	433670	0.000167346	0.588357	0.411476	36.0324	34.7248	34.7631
306_1	F	IV	i	0				36.1398	19.2024	23.154	181.556	2.27817e+06	380560	6.82822e-05	0.856805	0.143126	36.0324	34.7248	34.7631
306_9	F	II	i	0				33.858	20.9477	24.2576	634.764	891032	206422	0.000578062	0.811439	0.187983	36.0324	34.7248	34.7631
306_9	F	III	i	0				35.1769		28.5354	307.894	6.97108e+10	19270.2	4.41673e-09	1	2.7643e-07	36.0324	34.7248	34.7631
306_9	F	IV	i	0				34.9995	19.0213	23.4882	339.365	2.51127e+06	316216	0.000120009	0.888057	0.111823	36.0324	34.7248	34.7631
R30	A	I	i	1	25	6	0.333333	24.087	21.3447	33.4218	135028	719683	1283.92	0.157744	0.840756	0.00149992	37.172	36.5909	33.6641
R6	A	I	i	1	25	8	0.330097	25.2722	29.8623	27.1139	70481.3	7369.21	42374.4	0.586245	0.0612952	0.352459	37.172	36.5909	33.6641
R306	A	I	i	1	22	5		27.2948	28.7038	31.2078	23239.4	13742.3	4380.57	0.561849	0.332243	0.105907	37.172	36.5909	33.6641
R306	A	II	i	1	31	6		23.4096	22.6771	28.5203	195798	351475	19432.9	0.345502	0.620207	0.0342911	37.172	36.5909	33.6641
R306	A	III	i	1	63	11		22.1306	23.4654	28.4491	394937	230009	20215.1	0.612152	0.356515	0.0313335	37.172	36.5909	33.6641
R306	A	IV	i	1	14	4		21.889	23.5581	28.0576	450888	218831	25114.8	0.648915	0.31494	0.0361451	37.172	36.5909	33.6641
306_1	B	I	i	1	58	9		35.178	20.9093	26.441	307.721	909609	61533.9	0.000316765	0.936341	0.0633423	37.172	36.5909	33.6641
306_1	B	II	i	1	37	7		34.3664	22.2437	27.7329	480.283	443748	30067.4	0.00101262	0.935594	0.0633937	37.172	36.5909	33.6641
306_1	B	III	i	1	26	3		34.6975	21.0466	27.0815	400.513	844866	43144.2	0.00045082	0.950986	0.0485633	37.172	36.5909	33.6641
306_9	B	I	i	1	45	6		36.4125	29.0483	28.0484	156.333	11418	25242.7	0.00424622	0.310129	0.685625	37.172	36.5909	33.6641
306_9	B	II	i	1	52	9		37.6253	25.0617	27.6481	80.373	97464.7	31514.2	0.00062276	0.755193	0.244184	37.172	36.5909	33.6641
306_9	B	III	i	1	42	7		36.5324	27.0222	29.2288	146.38	33953.3	13120.6	0.00309995	0.719041	0.277859	37.172	36.5909	33.6641
R30	C	I	i	1	68	10	0.560284	22.3227	21.0909	31.5307	355434	824957	3662.65	0.300184	0.696723	0.00309332	37.172	36.5909	33.6641
R6	C	I	i	1	57	10	0.413043	24.4061	34.7552	26.6057	113346	530.199	56162.5	0.666589	0.0031181	0.330292	37.172	36.5909	33.6641
R306	C	I	i	1	73	13		21.4005	22.4839	27.0344	589456	389980	44285.1	0.575798	0.380943	0.043259	37.172	36.5909	33.6641
R306	C	II	i	1	79	11		22.1679	23.4758	28.0817	386926	228733	24780.9	0.604156	0.35715	0.0386936	37.172	36.5909	33.6641
R306	C	III	i	1	47	9		21.7512	24.6453	27.4929	486300	121935	34344.9	0.756792	0.189759	0.0534484	37.172	36.5909	33.6641
R306	C	IV	i	1	35	7		22.4222	24.0785	28.0982	336544	165399	24554.9	0.639212	0.314149	0.0466381	37.172	36.5909	33.6641
306_1	D	I	i	1	89	11		35.7879	24.1134	29.1544	220.214	162328	13673.6	0.00124965	0.921157	0.0775933	37.172	36.5909	33.6641
306_1	D	II	i	1	120	12			21.223	26.7019	7.39351e+10	768380	53248	0.999989	1.03925e-05	7.20191e-07	37.172	36.5909	33.6641
306_1	D	III	i	1	95	12		34.9703	20.0242	27.2211	344.843	1.46427e+06	39930.9	0.0002292	0.973231	0.0265401	37.172	36.5909	33.6641
306_9	D	I	i	1	63	8		35.4911	22.639	25.5883	259.154	358766	98717.2	0.000566157	0.783773	0.215661	37.172	36.5909	33.6641
306_9	D	II	i	1	105	11		37.4661	28.7728	24.8563	87.706	13241.4	148123	0.000543232	0.0820146	0.917442	37.172	36.5909	33.6641
306_9	D	III	i	1	88	10		36.9892	22.9781	25.5859	113.934	298946	98849.5	0.000286331	0.751291	0.248422	37.172	36.5909	33.6641
R30	E	I	i	1	59	9	0.542553	24.2202	24.0142	33.3794	125518	171223	1314.45	0.421123	0.574467	0.0044101	37.172	36.5909	33.6641
R6	E	I	i	1	75	10	0.474962	23.1428	36.7348	30.7815	226664	182.809	5548.47	0.975338	0.000786628	0.0238751	37.172	36.5909	33.6641
R306	E	I	i	1	59	10		21.6829	21.8719	28.2215	504861	541986	22933.5	0.47193	0.506633	0.0214376	37.172	36.5909	33.6641
R306	E	II	i	1	29	5		22.6307	25.8867	29.3994	300182	62536.7	11937.1	0.80122	0.166918	0.0318615	37.172	36.5909	33.6641
306_1	E	I	i	1	80	12		34.536	20.232	26.5816	437.623	1.3094e+06	56920.3	0.00032019	0.958034	0.0416462	37.172	36.5909	33.6641
306_9	E	I	i	1	70	12		35.5733	24.6813	26.9044	247.733	119596	47592.3	0.00147957	0.714279	0.284242	37.172	36.5909	33.6641
306_1	F	II	i	1	93	12		37.4216	21.7345	28.2809	89.8748	583558	22190.2	0.000148348	0.963224	0.0366273	37.172	36.5909	33.6641
306_1	F	III	i	1	73	10		37.2099	21.8055	27.8922	100.941	561697	27526	0.000171283	0.953121	0.0467077	37.172	36.5909	33.6641
306_1	F	IV	i	1	72	10		37.7249	22.09	28.7878	76.0975	482002	16754.3	0.000152551	0.96626	0.033587	37.172	36.5909	33.6641
306_9	F	II	i	1	74	10		36.3577	26.1615	29.6995	161.099	53943.3	10107.8	0.00250884	0.840079	0.157412	37.172	36.5909	33.6641
306_9	F	III	i	1	76	10			26.2094	27.4882	7.39351e+10	52571.8	34435.4	0.999999	7.11052e-07	4.65751e-07	37.172	36.5909	33.6641
306_9	F	IV	i	1	66	8		35.7473	26.6861	29.238	225.177	40681.3	13054.2	0.004173	0.753907	0.24192	37.172	36.5909	33.6641
R30	A	I	i	2	52	10	0.710145	22.4317	21.0808	33.0998	334798	829480	1534.82	0.28718	0.711504	0.00131652	35.775	35.2135	35.84
R6	A	I	i	2	63	11	0.25	22.8895	38.1668	26.1984	260449	84.6218	70388.7	0.78704	0.000255715	0.212704	35.775	35.2135	35.84
R306	A	I	i	2	56	11		39.6889	24.624	24.2551	25.9115	123340	206702	7.85037e-05	0.373682	0.62624	35.775	35.2135	35.84
R306	A	II	i	2	40	8		21.1404	28.5897	27.8013	679862	14612.4	28948	0.939786	0.020199	0.0400153	35.775	35.2135	35.84
R306	A	III	i	2	66	10		19.8	24.2448	27.015	1.4183e+06	151249	44763.1	0.878578	0.0936927	0.027729	35.775	35.2135	35.84
R306	A	IV	i	2	68	11		20.0813	27.4703	27.7369	1.21548e+06	26681.5	29999.8	0.955445	0.0209734	0.0235818	35.775	35.2135	35.84
306_1	B	I	i	2	40	9		36.1308	22.1756	27.4636	182.457	460306	34907.6	0.000368305	0.929168	0.070464	35.775	35.2135	35.84
306_1	B	II	i	2	56	11		38.0571	20.1681	27.384	63.4214	1.35523e+06	36483.1	4.55688e-05	0.973741	0.0262134	35.775	35.2135	35.84
306_1	B	III	i	2	47	9		36.3658	21.2314	25.4902	160.384	764909	104234	0.000184498	0.87991	0.119905	35.775	35.2135	35.84
306_9	B	I	i	2	64	11		35.8602	34.8255	24.1374	211.657	510.543	220645	0.000956134	0.00230631	0.996738	35.775	35.2135	35.84
306_9	B	II	i	2	60	9		36.2674	22.3941	24.8925	169.281	409262	145179	0.000305226	0.737927	0.261768	35.775	35.2135	35.84
306_9	B	III	i	2	90	14		36.0706	33.8525	24.3396	188.582	861.609	197250	0.000950994	0.00434497	0.994704	35.775	35.2135	35.84
R30	C	I	i	2	53	10	0.776471	19.3877	21.5788	32.0266	1.77821e+06	634550	2782.28	0.736153	0.262695	0.00115183	35.775	35.2135	35.84
R6	C	I	i	2	41	8	0.52	23.0227	33.5413	24.2475	242099	1018.62	207575	0.537171	0.00226013	0.460569	35.775	35.2135	35.84
R306	C	I	i	2	66	10		19.0692	24.2882	25.4475	2.11767e+06	147753	106728	0.892721	0.0622866	0.0449921	35.775	35.2135	35.84
R306	C	II	i	2	34	5		21.1905	26.8122	28.192	661421	38014.5	23311.5	0.915149	0.0525973	0.032254	35.775	35.2135	35.84
R306	C	III	i	2	68	11		19.3122	23.8	26.5405	1.85336e+06	192128	58231.3	0.880992	0.0913276	0.0276802	35.775	35.2135	35.84
R306	C	IV	i	2	64	9		19.5446	22.1269	27.4763	1.63158e+06	472543	34662.2	0.762854	0.22094	0.0162065	35.775	35.2135	35.84
306_1	D	I	i	2	83	14		36.2245	36.1949	23.9926	173.315	244.422	239087	0.000723642	0.00102053	0.998256	35.775	35.2135	35.84
306_1	D	II	i	2	22	7		35.5347	25.2169	26.2426	253.021	89662.1	68684.9	0.00159534	0.565335	0.43307	35.775	35.2135	35.84
306_1	D	III	i	2	48	10		33.5213	26.0962	23.9416	763.55	55872.4	245941	0.00252349	0.184655	0.812821	35.775	35.2135	35.84
306_9	D	I	i	2	61	10		32.407	25.7781	25.1064	1407	66299	128944	0.00715483	0.337143	0.655703	35.775	35.2135	35.84
306_9	D	II	i	2	48	9		32.5926	35.7827	25.0969	1270.84	305.09	129629	0.00968593	0.0023253	0.987989	35.775	35.2135	35.84
306_9	D	III	i	2	64	6		33.795	31.245	25.0069	657.108	3502.95	136256	0.00467973	0.024947	0.970373	35.775	35.2135	35.84
R30	E	I	i	2	73	11	0.539568	18.7943	19.7263	32.1882	2.46241e+06	1.71878e+06	2543.93	0.588567	0.410825	0.000608052	35.775	35.2135	35.84
R6	E	I	i	2	82	11	0.474359	19.5517	35.6003	23.0079	1.62522e+06	336.524	412675	0.797368	0.000165106	0.202467	35.775	35.2135	35.84
R306	E	I	i	2	101	12		18.5368	22.0022	25.1164	2.83588e+06	505321	128235	0.817389	0.145649	0.0369615	35.775	35.2135	35.84
R306	E	II	i	2	93	13		18.0092	24.8081	26.5309	3.78779e+06	111714	58543.2	0.956985	0.0282244	0.0147909	35.775	35.2135	35.84
306_1	E	I	i	2	48	7		33.417	21.1038	24.7389	808.521	819279	158084	0.000826564	0.837562	0.161611	35.775	35.2135	35.84
306_9	E	I	i	2	52	9		33.2712	36.2721	24.6473	875.826	234.476	166319	0.00523103	0.00140045	0.993369	35.775	35.2135	35.84
306_1	F	II	i	2	76	11		37.2973	20.6307	25.2364	96.2193	1.0567e+06	119982	8.17653e-05	0.897959	0.101959	35.775	35.2135	35.84
306_1	F	III	i	2	88	13		35.6062	19.9892	24.3224	243.297	1.49214e+06	199132	0.000143834	0.882132	0.117724	35.775	35.2135	35.84
306_1	F	IV	i	2	73	10		36.1448	20.7816	24.3845	181.063	974305	192396	0.000155168	0.834964	0.16488	35.775	35.2135	35.84
306_9	F	II	i	2	102	14		35.0943	20.6508	24.0028	322.172	1.04531e+06	237733	0.000251037	0.814507	0.185242	35.775	35.2135	35.84
306_9	F	III	i	2	57	7		36.0675	23.0255	23.7949	188.906	291413	266774	0.000338314	0.521894	0.477768	35.775	35.2135	35.84
306_9	F	IV	i	2	101	13		35.2247	22.1098	22.7714	299.934	476885	470474	0.000316501	0.503225	0.496459	35.775	35.2135	35.84
R30	A	I	i	3	54	12	0.861111	19.9236	36.858	33.9444	1.32529e+06	171.09	960.969	0.999147	0.000128986	0.00072448		36.3138	37.5247
R6	A	I	i	3	70	11	0.421053	24.8525	35.4477	26.4077	88729	365.317	62679.8	0.584612	0.00240698	0.412981		36.3138	37.5247
R306	A	I	i	3	83	10		20.6765	38.629	26.1221	876904	65.9952	73431.6	0.922667	6.94393e-05	0.0772638		36.3138	37.5247
R306	A	II	i	3	83	11		20.474	36.7016	28.3648	979885	186.111	21181.7	0.978659	0.000185878	0.0211552		36.3138	37.5247
R306	A	III	i	3	75	10		19.4258	26.0967	28.6667	1.74145e+06	55856	17918.2	0.959358	0.0307709	0.0098711		36.3138	37.5247
R306	A	IV	i	3	63	11		20.322		32.0663	1.06511e+06	6.97108e+10	2721.76	1.52788e-05	0.999985	3.90429e-08		36.3138	37.5247
306_1	B	I	i	3	79	11		33.9146	19.6537	24.4295	615.361	1.78716e+06	187658	0.000311507	0.904693	0.0949956		36.3138	37.5247
306_1	B	II	i	3	61	9		33.6738	18.9161	25.7989	702.275	2.6575e+06	87840.1	0.000255741	0.967756	0.0319879		36.3138	37.5247
306_1	B	III	i	3	89	13		34.6676	19.5689	24.5457	407.141	1.87065e+06	175955	0.000198895	0.913844	0.0859569		36.3138	37.5247
306_9	B	I	i	3	47	10		37.0678	38.9227	26.898	109.125	56.352	47762.5	0.00227686	0.00117576	0.996547		36.3138	37.5247
306_9	B	II	i	3	38	5		33.5782	23.2254	26.654	740.079	261716	54680.6	0.00233363	0.825246	0.17242		36.3138	37.5247
306_9	B	III	i	3	49	10		36.3389	38.2101	26.3539	162.769	82.6732	64575.5	0.00251106	0.00127541	0.996214		36.3138	37.5247
R30	C	I	i	3	92	10	0.953608	19.1892	21.0422	33.5649	1.98277e+06	846881	1186	0.700418	0.299163	0.000418957		36.3138	37.5247
R6	C	I	i	3	68	11	0.535714	21.2729	32.1999	24.5724	632194	2095.9	173364	0.782754	0.00259504	0.214651		36.3138	37.5247
R306	C	I	i	3	78	11		20.3499	34.4135	25.8896	1.04892e+06	637.175	83532.8	0.925717	0.000562334	0.0737211		36.3138	37.5247
R306	C	II	i	3	79	10		19.3644	23.2935	26.6633	1.8011e+06	252298	54397.8	0.854495	0.119697	0.0258079		36.3138	37.5247
R306	C	III	i	3	92	9		19.4809	33.0538	28.2088	1.68961e+06	1324.01	23095.1	0.985753	0.000772457	0.0134742		36.3138	37.5247
R306	C	IV	i	3	70	8		19.219	25.901	27.3517	1.95063e+06	62057.9	37141.2	0.951606	0.0302746	0.0181192		36.3138	37.5247
306_1	D	I	i	3	87	10		36.0331	38.9893	24.9653	192.495	54.3678	139438	0.00137807	0.000389218	0.998233		36.3138	37.5247
306_1	D	II	i	3	52	7		35.2377	21.3033	25.4909	297.802	735894	104192	0.000354364	0.875664	0.123982		36.3138	37.5247
306_1	D	III	i	3	62	10		36.0786	35.5466	24.9248	187.751	346.389	142599	0.00131172	0.00242005	0.996268		36.3138	37.5247
306_9	D	I	i	3	106	10		33.9023	35.2059	24.6827	619.521	416.068	163081	0.00377488	0.0025352	0.99369		36.3138	37.5247
306_9	D	II	i	3	79	9		35.2273	35.7968	26.0417	299.502	302.776	76776.3	0.0038706	0.00391292	0.992216		36.3138	37.5247
306_9	D	III	i	3	77	10		34.4849	36.5887	25.1769	450.049	197.761	124003	0.00361047	0.00158652	0.994803		36.3138	37.5247
R30	E	I	i	3	53	11	0.90625	20.9586	23.9925	36.4474	751175	173230	239.951	0.812393	0.187347	0.000259506		36.3138	37.5247
R6	E	I	i	3	59	10	0.506329	21.664	35.1074	26.0344	510141	438.709	77089.1	0.868076	0.000746525	0.131178		36.3138	37.5247
R306	E	I	i	3	81	13		20.1869	23.1852	28.9006	1.14704e+06	267428	15739.2	0.80201	0.186985	0.0110048		36.3138	37.5247
R306	E	II	i	3	65	10		20.4127	36.178	36.2213	1.01342e+06	246.652	271.997	0.999488	0.000243263	0.000268259		36.3138	37.5247
306_1	E	I	i	3	68	12		32.212	20.2257	25.4133	1565.88	1.31389e+06	108776	0.00109946	0.922525	0.0763752		36.3138	37.5247
306_9	E	I	i	3	71	11		28.3424	38.4902	26.066	13081	71.1134	75752.6	0.147135	0.000799883	0.852065		36.3138	37.5247
306_1	F	II	i	3	74	11		35.7491	35.5383	26.1563	224.949	347.94	72051.4	0.00309744	0.00479096	0.992112		36.3138	37.5247
306_1	F	III	i	3	88	12		34.0766	19.292	25.2345	563.058	2.171e+06	120105	0.000245698	0.947345	0.0524093		36.3138	37.5247
306_1	F	IV	i	3	84	11		33.6193	20.33	25.7781	723.574	1.24219e+06	88856.2	0.000543319	0.932736	0.0667205		36.3138	37.5247
306_9	F	II	i	3	50	7		35.1875	22.0973		306.123	480103	1.4276e+11	2.14432e-09	3.363e-06	0.999997		36.3138	37.5247
306_9	F	III	i	3	83	12		35.1989	23.8085	26.1767	304.21	191257	71240.6	0.00115757	0.727761	0.271081		36.3138	37.5247
306_9	F	IV	i	3	78	11		34.3818	23.6732	27.3401	476.245	205690	37381.9	0.00195544	0.844556	0.153489		36.3138	37.5247
R30	A	I	ii	0			0.0998217	21.6373	18.2429	34.9748	517660	3.81713e+06	542.83	0.119405	0.88047	0.000125211	36.0324	34.7248	34.7631
R6	A	I	ii	0			0.107468	21.8708	35.553	20.7385	455421	345.198	1.45193e+06	0.238728	0.00018095	0.761091	36.0324	34.7248	34.7631
R306	A	I	ii	0				19.4303	19.2063	23.3377	1.73709e+06	2.27347e+06	343715	0.398939	0.522123	0.0789374	36.0324	34.7248	34.7631
R306	A	II	ii	0				20.0913	19.9398	24.7939	1.2088e+06	1.53225e+06	153331	0.417637	0.529388	0.0529751	36.0324	34.7248	34.7631
R306	A	III	ii	0				20.2913	19.7773	24.7866	1.08323e+06	1.67226e+06	153954	0.372314	0.57477	0.0529153	36.0324	34.7248	34.7631
R306	A	IV	ii	0				19.5297	19.9788	24.6604	1.64491e+06	1.50046e+06	165111	0.496881	0.453244	0.0498753	36.0324	34.7248	34.7631
306_1	B	I	ii	0				39.9035	19.6599	24.0592	23.0334	1.78121e+06	230421	1.145e-05	0.885445	0.114543	36.0324	34.7248	34.7631
306_1	B	II	ii	0					19.3956	23.8118	7.39351e+10	2.05341e+06	264278	0.999969	2.77722e-05	3.57435e-06	36.0324	34.7248	34.7631
306_1	B	III	ii	0				36.7548		23.0081	129.57	6.97108e+10	412615	1.85867e-09	0.999994	5.91891e-06	36.0324	34.7248	34.7631
306_9	B	I	ii	0				35.4968	22.0163	22.6876	258.348	501484	492858	0.000259751	0.504206	0.495534	36.0324	34.7248	34.7631
306_9	B	II	ii	0				38.2028	21.0178	24.321	58.5516	858050	199293	5.53731e-05	0.811471	0.188474	36.0324	34.7248	34.7631
306_9	B	III	ii	0				36.5082	21.3848	22.9192	148.335	704330	433473	0.000130353	0.618946	0.380924	36.0324	34.7248	34.7631
R30	C	I	ii	0			0.215385	21.3966	19.1948	34.9819	590714	2.2876e+06	540.678	0.205191	0.794622	0.00018781	36.0324	34.7248	34.7631
R6	C	I	ii	0			0.0980392	21.2682	36.0833	21.5494	633848	259.534	926270	0.406214	0.000166328	0.593619	36.0324	34.7248	34.7631
R306	C	I	ii	0				20.0047	20.843	24.54	1.26759e+06	942662	176507	0.531092	0.394955	0.0739528	36.0324	34.7248	34.7631
R306	C	II	ii	0				19.8553	21.0612	23.5803	1.37587e+06	838249	300467	0.547155	0.333355	0.11949	36.0324	34.7248	34.7631
R306	C	III	ii	0				19.4452	20.6737	23.543	1.72302e+06	1.0325e+06	306749	0.562661	0.337169	0.100171	36.0324	34.7248	34.7631
R306	C	IV	ii	0				20.0094	21.0724	23.6976	1.26438e+06	833228	281556	0.531438	0.350219	0.118343	36.0324	34.7248	34.7631
306_1	D	I	ii	0					20.8914	23.3594	7.39351e+10	918416	339614	0.999983	1.24217e-05	4.59333e-06	36.0324	34.7248	34.7631
306_1	D	II	ii	0				36.4936	20.5181	24.1955	149.524	1.12264e+06	213649	0.000111883	0.840023	0.159865	36.0324	34.7248	34.7631
306_1	D	III	ii	0				36.3624	20.2097	21.548	160.687	1.32523e+06	926949	7.13423e-05	0.58838	0.411549	36.0324	34.7248	34.7631
306_9	D	I	ii	0					23.5849	22.4205	7.39351e+10	215696	571487	0.999989	2.91734e-06	7.7295e-06	36.0324	34.7248	34.7631
306_9	D	II	ii	0				37.3742	22.6588	21.7798	92.2449	354959	815198	7.8825e-05	0.303319	0.696602	36.0324	34.7248	34.7631
306_9	D	III	ii	0				35.3077	23.1512	22.5935	286.581	272361	519240	0.000361896	0.343939	0.655699	36.0324	34.7248	34.7631
R30	E	I	ii	0			0.0976645	23.1985	19.1731	34.3442	219835	2.31444e+06	769.966	0.0867185	0.912978	0.000303729	36.0324	34.7248	34.7631
R6	E	I	ii	0			0.0903084	22.5022		23.2266	322095	6.97108e+10	365547	4.6204e-06	0.99999	5.24371e-06	36.0324	34.7248	34.7631
R306	E	I	ii	0				21.2623	19.5319	23.9617	635892	1.90821e+06	243208	0.228138	0.684606	0.0872555	36.0324	34.7248	34.7631
R306	E	II	ii	0				20.9936	20.1364	22.6183	736883	1.37852e+06	512152	0.280444	0.52464	0.194916	36.0324	34.7248	34.7631
306_1	E	I	ii	0				35.2808	21.1094	26.5306	290.834	816786	58551	0.000332144	0.9328	0.0668675	36.0324	34.7248	34.7631
306_9	E	I	ii	0				35.3444	22.069	23.2048	280.862	487490	370000	0.000327433	0.568322	0.431351	36.0324	34.7248	34.7631
306_1	F	II	ii	0					20.7221	24.5058	7.39351e+10	1.00601e+06	179886	0.999984	1.36064e-05	2.43299e-06	36.0324	34.7248	34.7631
306_1	F	III	ii	0				37.2566	22.4766	23.3715	98.3875	391502	337334	0.000134974	0.537088	0.462777	36.0324	34.7248	34.7631
306_1	F	IV	ii	0				34.9362	20.0573	23.823	351.356	1.43841e+06	262645	0.00020651	0.845424	0.154369	36.0324	34.7248	34.7631
306_9	F	II	ii	0				36.3842	22.2632	22.8696	158.78	439137	445556	0.000179442	0.496283	0.503537	36.0324	34.7248	34.7631
306_9	F	III	ii	0				39.5494	37.9605	23.0165	27.9718	94.5533	410716	6.80846e-05	0.000230147	0.999702	36.0324	34.7248	34.7631
306_9	F	IV	ii	0				33.704	19.6244	23.4516	690.715	1.81559e+06	322695	0.000322918	0.848813	0.150864	36.0324	34.7248	34.7631
R30	A	I	ii	1	25	6	0.333333	24.0409	21.3519	32.5442	138488	716925	2088.35	0.161502	0.836063	0.00243539	37.172	36.5909	33.6641
R6	A	I	ii	1	25	8	0.330097	24.9189	29.6811	26.9495	85553.3	8123.64	46419.1	0.610676	0.0579862	0.331338	37.172	36.5909	33.6641
R306	A	I	ii	1	22	5		26.335	28.1383	31.2235	39344.8	18628.1	4342.54	0.631381	0.298933	0.0696864	37.172	36.5909	33.6641
R306	A	II	ii	1	31	6		22.2212	22.4145	28.3103	375776	404800	21832.2	0.46831	0.504482	0.0272083	37.172	36.5909	33.6641
R306	A	III	ii	1	63	11		21.743	23.2293	28.3879	488511	261158	20912.4	0.633951	0.338911	0.0271384	37.172	36.5909	33.6641
R306	A	IV	ii	1	14	4		21.2003	22.7143	27.9749	657902	344512	26293.2	0.639542	0.334898	0.0255595	37.172	36.5909	33.6641
306_1	B	I	ii	1	58	9		34.6229	20.6043	25.8772	417.237	1.07182e+06	84109.4	0.000360823	0.926902	0.0727372	37.172	36.5909	33.6641
306_1	B	II	ii	1	37	7		34.2649	22.3584	27.6684	507.8	417212	31161	0.00113126	0.929449	0.0694193	37.172	36.5909	33.6641
306_1	B	III	ii	1	26	3		33.9468	21.0231	27.0222	604.607	855600	44585.4	0.000671196	0.949833	0.0494959	37.172	36.5909	33.6641
306_9	B	I	ii	1	45	6		35.3411	29.0303	27.9204	281.379	11529.2	27099.4	0.00723153	0.296304	0.696465	37.172	36.5909	33.6641
306_9	B	II	ii	1	52	9		36.116	24.8371	27.9179	183.943	109981	27136.9	0.0013397	0.801016	0.197644	37.172	36.5909	33.6641
306_9	B	III	ii	1	42	7		36.8959	27.0462	29.1706	119.918	33518	13550.8	0.00254124	0.710298	0.287161	37.172	36.5909	33.6641
R30	C	I	ii	1	68	10	0.560284	22.1313	21.0584	31.3477	394787	839540	4053.62	0.318793	0.677934	0.00327333	37.172	36.5909	33.6641
R6	C	I	ii	1	57	10	0.413043	24.3479	33.8491	26.5091	117023	863.177	59251.9	0.660631	0.00487291	0.334496	37.172	36.5909	33.6641
R306	C	I	ii	1	73	13		21.2464	22.8402	26.878	641479	321957	48296.5	0.63404	0.318224	0.0477364	37.172	36.5909	33.6641
R306	C	II	ii	1	79	11		21.9384	23.4144	27.7333	438840	236411	30060.6	0.622193	0.335186	0.0426204	37.172	36.5909	33.6641
R306	C	III	ii	1	47	9		21.486	24.9402	27.5197	562442	104049	33839.7	0.803109	0.148571	0.0483195	37.172	36.5909	33.6641
R306	C	IV	ii	1	35	7		22.2859	23.9799	28.0593	362681	174411	25091.3	0.645129	0.310239	0.0446319	37.172	36.5909	33.6641
306_1	D	I	ii	1	89	11		35.4395	24.1731	29.0353	266.592	157190	14606.7	0.00154938	0.91356	0.0848909	37.172	36.5909	33.6641
306_1	D	II	ii	1	120	12		38.1054	21.0795	26.5558	61.7628	830048	57738.2	6.95646e-05	0.934899	0.0650316	37.172	36.5909	33.6641
306_1	D	III	ii	1	95	12		35.415	20.0941	27.1354	270.204	1.41024e+06	41874	0.000186041	0.970983	0.0288311	37.172	36.5909	33.6641
306_9	D	I	ii	1	63	8		34.6113	22.5846	25.582	419.9	369405	99063.7	0.000895522	0.787831	0.211273	37.172	36.5909	33.6641
306_9	D	II	ii	1	105	11		35.411	28.7764	24.7189	270.793	13215.9	159843	0.0015623	0.0762475	0.92219	37.172	36.5909	33.6641
306_9	D	III	ii	1	88	10		38.0909	23.0199	25.4657	62.2562	292294	105661	0.000156416	0.734374	0.265469	37.172	36.5909	33.6641
R30	E	I	ii	1	59	9	0.542553	25.7261	24.5296	33.0284	54946.9	129767	1596.73	0.294921	0.696509	0.00857028	37.172	36.5909	33.6641
R6	E	I	ii	1	75	10	0.474962	23.0109		27.6622	243664	6.97108e+10	31269.3	3.49533e-06	0.999996	4.48555e-07	37.172	36.5909	33.6641
R306	E	I	ii	1	59	10		21.2549	21.8246	28.2601	638461	555978	22447.5	0.524667	0.456886	0.0184466	37.172	36.5909	33.6641
R306	E	II	ii	1	29	5		22.1291	26.1511	29.2058	395261	54247.4	13289.4	0.854068	0.117216	0.0287154	37.172	36.5909	33.6641
306_1	E	I	ii	1	80	12		35.9686	20.2991	26.4565	199.431	1.26299e+06	61007.1	0.000150606	0.953778	0.0460711	37.172	36.5909	33.6641
306_9	E	I	ii	1	70	12		35.7587	24.5118	26.6727	223.767	131016	54115.1	0.00120724	0.706839	0.291954	37.172	36.5909	33.6641
306_1	F	II	ii	1	93	12		38.1826	22.5959	28.5388	59.2014	367171	19234	0.000153187	0.950078	0.0497692	37.172	36.5909	33.6641
306_1	F	III	ii	1	73	10		37.4737	21.4344	27.8539	87.3432	685791	28116.3	0.00012233	0.960499	0.0393788	37.172	36.5909	33.6641
306_1	F	IV	ii	1	72	10		35.5985	22.3779	28.5968	244.324	412862	18626.1	0.000565914	0.956291	0.0431428	37.172	36.5909	33.6641
306_9	F	II	ii	1	74	10		36.2385	26.9733	29.5302	171.99	34858	11102.1	0.00372821	0.755613	0.240659	37.172	36.5909	33.6641
306_9	F	III	ii	1	76	10		35.6778	26.2601	27.1353	233.927	51156.7	41875.9	0.00250816	0.5485	0.448992	37.172	36.5909	33.6641
306_9	F	IV	ii	1	66	8		37.4714	27.7299	28.415	87.4522	23204.2	20600.6	0.00199243	0.528663	0.469345	37.172	36.5909	33.6641
R30	A	I	ii	2	52	10	0.710145	21.257	20.4115	32.1556	637733	1.1889e+06	2590.4	0.348636	0.649948	0.00141612	35.775	35.2135	35.84
R6	A	I	ii	2	63	11	0.25	22.0244	34.3801	23.9905	418630	648.728	239355	0.635603	0.000984961	0.363412	35.775	35.2135	35.84
R306	A	I	ii	2	56	11		19.9721	23.6898	24.0082	1.29049e+06	203858	237026	0.745356	0.117744	0.136901	35.775	35.2135	35.84
R306	A	II	ii	2	40	8		20.2979	28.6323	27.6483	1.0793e+06	14281	31511	0.959299	0.0126932	0.0280075	35.775	35.2135	35.84
R306	A	III	ii	2	66	10		19.4336	24.1087	26.9839	1.73399e+06	162736	45541.7	0.892766	0.0837863	0.0234477	35.775	35.2135	35.84
R306	A	IV	ii	2	68	11		19.6124	26.4054	28.193	1.57199e+06	47312.2	23298.2	0.957013	0.0288033	0.0141837	35.775	35.2135	35.84
306_1	B	I	ii	2	40	9		35.8407	22.101	27.5062	213.933	479151	34093.9	0.000416651	0.933183	0.0664005	35.775	35.2135	35.84
306_1	B	II	ii	2	56	11		35.2041	19.8272	26.1218	303.34	1.62798e+06	73443.5	0.000178254	0.956663	0.0431583	35.775	35.2135	35.84
306_1	B	III	ii	2	47	9		35.2304	20.5679	25.404	298.991	1.09299e+06	109336	0.000248616	0.908837	0.0909145	35.775	35.2135	35.84
306_9	B	I	ii	2	64	11		36.2524	34.1576	23.7042	170.683	731.214	280527	0.000606488	0.00259822	0.996795	35.775	35.2135	35.84
306_9	B	II	ii	2	60	9		35.2127	22.107	24.5526	301.906	477609	175281	0.000462201	0.731193	0.268345	35.775	35.2135	35.84
306_9	B	III	ii	2	90	14		38.6894	33.7578	24.2438	44.8323	906.656	208007	0.000214551	0.00433892	0.995447	35.775	35.2135	35.84
R30	C	I	ii	2	53	10	0.776471	19.4839	20.8777	32.1888	1.68678e+06	925227	2543.1	0.645151	0.353876	0.000972674	35.775	35.2135	35.84
R6	C	I	ii	2	41	8	0.52	22.174	34.6584	24.0159	385649	558.539	236010	0.619798	0.000897658	0.379305	35.775	35.2135	35.84
R306	C	I	ii	2	66	10		19.5401	24.038	25.1016	1.63558e+06	169038	129288	0.845739	0.0874075	0.0668532	35.775	35.2135	35.84
R306	C	II	ii	2	34	5		21.5737	26.2207	28.1243	536049	52253.8	24202.5	0.875174	0.0853116	0.0395139	35.775	35.2135	35.84
R306	C	III	ii	2	68	11		19.708	24.7334	26.238	1.49165e+06	116289	68860.8	0.889582	0.0693517	0.0410667	35.775	35.2135	35.84
R306	C	IV	ii	2	64	9		19.176	21.7028	24.4378	1.9972e+06	593617	186794	0.719035	0.213715	0.0672499	35.775	35.2135	35.84
306_1	D	I	ii	2	83	14		36.6862	35.8179	23.9593	134.538	299.367	243529	0.000551468	0.0012271	0.998221	35.775	35.2135	35.84
306_1	D	II	ii	2	22	7		36.0931	24.3299	25.7673	186.267	144480	89392.2	0.000795815	0.617281	0.381923	35.775	35.2135	35.84
306_1	D	III	ii	2	48	10		33.1263	26.0421	23.7958	948.292	57523.1	266632	0.00291689	0.176938	0.820145	35.775	35.2135	35.84
306_9	D	I	ii	2	61	10		31.846	25.6267	24.8472	1914.07	71924.8	148873	0.00859436	0.32295	0.668456	35.775	35.2135	35.84
306_9	D	II	ii	2	48	9		34.1475	34.8818	25.0807	541.577	495.301	130793	0.00410815	0.00375712	0.992135	35.775	35.2135	35.84
306_9	D	III	ii	2	64	6		32.3096	30.972	24.707	1484.28	4056.92	160897	0.00891786	0.0243749	0.966707	35.775	35.2135	35.84
R30	E	I	ii	2	73	11	0.539568	18.7746	20.1249	32.2596	2.48913e+06	1.38705e+06	2445.25	0.641757	0.357613	0.000630444	35.775	35.2135	35.84
R6	E	I	ii	2	82	11	0.474359	19.0324	36.2027	23.1456	2.16082e+06	243.398	382336	0.84958	9.56977e-05	0.150325	35.775	35.2135	35.84
R306	E	I	ii	2	101	12		18.4199	22.2385	24.71	3.0238e+06	445000	160635	0.833132	0.122609	0.0442589	35.775	35.2135	35.84
R306	E	II	ii	2	93	13		18.0534	24.7786	26.0491	3.69715e+06	113499	76461.9	0.951131	0.0291988	0.0196706	35.775	35.2135	35.84
306_1	E	I	ii	2	48	7		33.9767	20.5508	25.0119	594.764	1.1031e+06	135881	0.000479814	0.889901	0.10962	35.775	35.2135	35.84
306_9	E	I	ii	2	52	9		33.8003	33.4537	24.5221	655.178	1067.79	178266	0.0036401	0.00593254	0.990427	35.775	35.2135	35.84
306_1	F	II	ii	2	76	11		39.5729	22.5428	25.7818	27.6136	377806	88676.4	5.91918e-05	0.809856	0.190085	35.775	35.2135	35.84
306_1	F	III	ii	2	88	13		35.7944	20.3734	24.7797	219.433	1.21352e+06	154544	0.00016037	0.886893	0.112947	35.775	35.2135	35.84
306_1	F	IV	ii	2	73	10		35.1864	21.4921	24.4357	306.295	664830	187018	0.000359436	0.780176	0.219465	35.775	35.2135	35.84
306_9	F	II	ii	2	102	14		37.6459	22.1406	24.14	79.4716	469060	220328	0.000115265	0.680322	0.319563	35.775	35.2135	35.84
306_9	F	III	ii	2	57	7		36.0957	23.2719	24.2073	186.006	255239	212254	0.000397722	0.545758	0.453845	35.775	35.2135	35.84
306_9	F	IV	ii	2	101	13		39.3901	22.672	23.2223	30.5263	352444	366424	4.24626e-05	0.490256	0.509702	35.775	35.2135	35.84
R30	A	I	ii	3	54	12	0.861111	19.459	23.287	33.0456	1.71003e+06	253181	1581.61	0.870336	0.128859	0.000804972		36.3138	37.5247
R6	A	I	ii	3	70	11	0.421053	23.7468	38.346	26.0694	162734	76.8467	75608.7	0.682553	0.000322317	0.317124		36.3138	37.5247
R306	A	I	ii	3	83	10		19.3132	33.9514	25.0702	1.85241e+06	816.975	131558	0.933305	0.000411618	0.0662832		36.3138	37.5247
R306	A	II	ii	3	83	11		19.7739	37.3045	28.1918	1.43875e+06	134.561	23314.5	0.983963	9.20266e-05	0.0159448		36.3138	37.5247
R306	A	III	ii	3	75	10		18.8837	26.1207	27.1701	2.34446e+06	55141.9	41074.7	0.960578	0.0225929	0.0168292		36.3138	37.5247
R306	A	IV	ii	3	63	11		19.9501	29.789	32.1196	1.30613e+06	7665.91	2642.53	0.992169	0.00582321	0.00200733		36.3138	37.5247
306_1	B	I	ii	3	79	11		33.1242	19.4038	24.6254	949.355	2.0443e+06	168348	0.000428874	0.92352	0.0760515		36.3138	37.5247
306_1	B	II	ii	3	61	9		32.6307	18.7639	25.6314	1244.56	2.88421e+06	96384	0.000417381	0.967259	0.0323237		36.3138	37.5247
306_1	B	III	ii	3	89	13		34.5462	19.8302	24.7074	435.171	1.62531e+06	160866	0.000243573	0.909717	0.0900395		36.3138	37.5247
306_9	B	I	ii	3	47	10		39.127	38.9602	26.8765	35.2661	55.2283	48336.4	0.000728233	0.00114045	0.998131		36.3138	37.5247
306_9	B	II	ii	3	38	5		34.2074	23.3596	27.0716	524.073	243479	43381	0.0018236	0.847225	0.150952		36.3138	37.5247
306_9	B	III	ii	3	49	10		35.361		26.4927	278.331	6.97108e+10	59794.4	3.99264e-09	0.999999	8.57748e-07		36.3138	37.5247
R30	C	I	ii	3	92	10	0.953608	19.26	21.9052	33.664	1.90727e+06	532384	1122.6	0.78142	0.21812	0.000459935		36.3138	37.5247
R6	C	I	ii	3	68	11	0.535714	21.112	32.1518	24.7005	690560	2150.86	161482	0.808436	0.002518	0.189046		36.3138	37.5247
R306	C	I	ii	3	78	11		19.6103	35.6338	26.2972	1.57377e+06	330.528	66638.1	0.959184	0.000201451	0.0406146		36.3138	37.5247
R306	C	II	ii	3	79	10		19.1331	23.5712	26.696	2.04471e+06	217284	53421.4	0.883085	0.0938426	0.0230721		36.3138	37.5247
R306	C	III	ii	3	92	9		19.3779		28.1359	1.78782e+06	6.97108e+10	24047	2.56456e-05	0.999974	3.44945e-07		36.3138	37.5247
R306	C	IV	ii	3	70	8		19.1867	25.6568	27.3939	1.98552e+06	70770.3	36282.9	0.948841	0.0338198	0.0173389		36.3138	37.5247
306_1	D	I	ii	3	87	10		37.4805	37.0719	25.0767	87.0169	152.499	131083	0.000662619	0.00116126	0.998176		36.3138	37.5247
306_1	D	II	ii	3	52	7		33.7774	21.6788	25.6557	663.462	601308	95096.9	0.000951788	0.862624	0.136424		36.3138	37.5247
306_1	D	III	ii	3	62	10		33.3771	37.4049	25.0354	826.386	127.485	134122	0.00611793	0.000943804	0.992938		36.3138	37.5247
306_9	D	I	ii	3	106	10		33.6387		24.8528	715.926	6.97108e+10	148407	1.02699e-08	0.999998	2.1289e-06		36.3138	37.5247
306_9	D	II	ii	3	79	9		37.2583		26.0512	98.2978	6.97108e+10	76374.8	1.41008e-09	0.999999	1.09559e-06		36.3138	37.5247
306_9	D	III	ii	3	77	10		35.1158		25.1163	318.4	6.97108e+10	128239	4.56744e-09	0.999998	1.83958e-06		36.3138	37.5247
R30	E	I	ii	3	53	11	0.90625	21.2131	25.3825	37.2813	653300	82021.5	151.139	0.888272	0.111522	0.000205499		36.3138	37.5247
R6	E	I	ii	3	59	10	0.506329	21.6381	35.5274	25.918	517423	349.997	82228.6	0.862369	0.000583328	0.137047		36.3138	37.5247
R306	E	I	ii	3	81	13		20.288	23.3979	29.0635	1.08518e+06	238525	14379.9	0.810995	0.178259	0.0107466		36.3138	37.5247
R306	E	II	ii	3	65	10		20.4675	34.5739	36.1829	983417	584.517	277.854	0.999124	0.000593853	0.000282292		36.3138	37.5247
306_1	E	I	ii	3	68	12		32.2978	20.1356	25.5279	1493.87	1.3791e+06	102080	0.00100755	0.930144	0.0688486		36.3138	37.5247
306_9	E	I	ii	3	71	11		28.3534	37.8667	25.9581	13002.5	99.4477	80420.2	0.139031	0.00106336	0.859906		36.3138	37.5247
306_1	F	II	ii	3	74	11		36.1367	22.885	26.2443	181.864	314291	68622.6	0.000474723	0.820399	0.179127		36.3138	37.5247
306_1	F	III	ii	3	88	12		35.0284	20.0195	25.8264	334.027	1.46799e+06	86509.3	0.000214831	0.944146	0.0556388		36.3138	37.5247
306_1	F	IV	ii	3	84	11		32.3423	20.8209	26.1869	1457.84	953948	70840.9	0.00142056	0.92955	0.0690291		36.3138	37.5247
306_9	F	II	ii	3	50	7		34.2741		27.0063	505.237	6.97108e+10	44979.5	7.24761e-09	0.999999	6.45229e-07		36.3138	37.5247
306_9	F	III	ii	3	83	12		34.6211	24.1876	27.7913	417.666	155970	29110.1	0.0022516	0.840819	0.15693		36.3138	37.5247
306_9	F	IV	ii	3	78	11		34.1529	24.1425	25.9428	539.953	159805	81103.2	0.00223631	0.66186	0.335903		36.3138	37.5247
R30	A	I	iii	0			0.0998217	22.2303	19.0374	35.8813	373917	2.48966e+06	328.403	0.130562	0.869323	0.00011467	35.9609	36.8462	38.692
R6	A	I	iii	0			0.107468	22.4765	35.211	21.3099	326683	414.925	1.05774e+06	0.2359	0.000299621	0.7638	35.9609	36.8462	38.692
R306	A	I	iii	0				20.1393	19.7652	23.3912	1.1774e+06	1.68319e+06	333686	0.368596	0.52694	0.104464	35.9609	36.8462	38.692
R306	A	II	iii	0				20.4783	20.1863	23.2965	977587	1.34203e+06	351666	0.365962	0.502391	0.131647	35.9609	36.8462	38.692
R306	A	III	iii	0				20.6392	19.8746	23.3948	895002	1.58694e+06	333005	0.317946	0.563755	0.118299	35.9609	36.8462	38.692
R306	A	IV	iii	0				20.8413	21.1915	23.1558	801079	781538	380191	0.408129	0.398173	0.193697	35.9609	36.8462	38.692
306_1	B	I	iii	0				36.9436	19.5378	22.7749	116.82	1.90218e+06	469572	4.92523e-05	0.801976	0.197975	35.9609	36.8462	38.692
306_1	B	II	iii	0				35.3943	19.1388	22.6992	273.286	2.35757e+06	489687	9.59731e-05	0.827935	0.171969	35.9609	36.8462	38.692
306_1	B	III	iii	0					18.2999	22.143	7.39351e+10	3.70184e+06	666520	0.999941	5.00658e-05	9.0144e-06	35.9609	36.8462	38.692
306_9	B	I	iii	0				36.0418	21.4032	21.2747	191.584	697398	1.0786e+06	0.000107862	0.392637	0.607255	35.9609	36.8462	38.692
306_9	B	II	iii	0				35.225	20.8268	20.6225	299.889	950895	1.54836e+06	0.000119977	0.380425	0.619455	35.9609	36.8462	38.692
306_9	B	III	iii	0				35.3988	21.3379	21.0747	272.619	722321	1.20507e+06	0.000141425	0.374714	0.625145	35.9609	36.8462	38.692
R30	C	I	iii	0			0.215385	21.6373	20.1719	35.7175	517671	1.35241e+06	359.628	0.276764	0.723044	0.000192269	35.9609	36.8462	38.692
R6	C	I	iii	0			0.0980392	21.3177	34.263	20.7011	616854	690.915	1.48238e+06	0.293751	0.000329019	0.70592	35.9609	36.8462	38.692
R306	C	I	iii	0				20.2085	20.8742	22.3274	1.13353e+06	926948	601764	0.425781	0.348183	0.226036	35.9609	36.8462	38.692
R306	C	II	iii	0				19.979	21.1317	22.9759	1.28562e+06	807061	420051	0.511642	0.321189	0.167169	35.9609	36.8462	38.692
R306	C	III	iii	0				19.523	20.7065	22.3395	1.65101e+06	1.01446e+06	597733	0.505948	0.310878	0.183174	35.9609	36.8462	38.692
R306	C	IV	iii	0				19.882	20.9861	22.7564	1.35591e+06	872813	474399	0.501609	0.32289	0.1755	35.9609	36.8462	38.692
306_1	D	I	iii	0				36.3009	20.3206	22.1768	166.199	1.24852e+06	654175	8.73415e-05	0.656128	0.343785	35.9609	36.8462	38.692
306_1	D	II	iii	0				36.3239	20.5574	22.3178	164.114	1.09918e+06	604981	9.62926e-05	0.644935	0.354969	35.9609	36.8462	38.692
306_1	D	III	iii	0				37.411	20.0654	22.2046	90.3987	1.43221e+06	644177	4.35346e-05	0.689731	0.310226	35.9609	36.8462	38.692
306_9	D	I	iii	0				21.1004	23.9878	21.4761	694958	173671	964654	0.379078	0.0947321	0.526189	35.9609	36.8462	38.692
306_9	D	II	iii	0				35.3889	22.6574	21.7081	274.091	355218	848230	0.000227703	0.2951	0.704673	35.9609	36.8462	38.692
306_9	D	III	iii	0				35.0775	23.0768	21.4927	325.159	283487	955842	0.000262298	0.228682	0.771055	35.9609	36.8462	38.692
R30	E	I	iii	0			0.0976645	23.2071	20.1615	33.2533	218811	1.36e+06	1409.6	0.138469	0.860639	0.000892024	35.9609	36.8462	38.692
R6	E	I	iii	0			0.0903084	22.6098		22.0784	303641	6.97108e+10	690834	4.35565e-06	0.999986	9.90985e-06	35.9609	36.8462	38.692
R306	E	I	iii	0				19.3426	19.0758	23.3463	1.82277e+06	2.43882e+06	342091	0.395938	0.529754	0.0743082	35.9609	36.8462	38.692
R306	E	II	iii	0				37.0447	20.3869	22.5783	110.516	1.20477e+06	523627	6.3937e-05	0.697	0.302936	35.9609	36.8462	38.692
306_1	E	I	iii	0				35.2609	21.2555	25.0168	294.037	755089	135511	0.000330047	0.847563	0.152107	35.9609	36.8462	38.692
306_9	E	I	iii	0				35.2236	21.7967	22.4218	300.12	564383	571104	0.000264239	0.496909	0.502827	35.9609	36.8462	38.692
306_1	F	II	iii	0				36.52	20.0805	22.7537	147.38	1.42059e+06	475121	7.77381e-05	0.749312	0.25061	35.9609	36.8462	38.692
306_1	F	III	iii	0				37.0296	19.2821	22.2218	111.438	2.18259e+06	638038	3.95068e-05	0.773765	0.226195	35.9609	36.8462	38.692
306_1	F	IV	iii	0				38.5034	19.3287	23.0866	49.6505	2.12857e+06	395053	1.96739e-05	0.843442	0.156539	35.9609	36.8462	38.692
306_9	F	II	iii	0				35.865	21.4683	22.2899	211.093	673401	614427	0.000163887	0.522811	0.477025	35.9609	36.8462	38.692
306_9	F	III	iii	0				35.1282	21.7055	23.0056	316.235	592749	413201	0.000314266	0.589058	0.410628	35.9609	36.8462	38.692
306_9	F	IV	iii	0				34.4029	22.2879	22.3632	470.769	433328	589959	0.000459844	0.423272	0.576268	35.9609	36.8462	38.692
R30	A	I	iii	1	25	6	0.333333	23.825	39.4499	34.1174	155905	42.4377	873.088	0.994162	0.000270613	0.00556744	33.5984	36.2877	34.338
R6	A	I	iii	1	25	8	0.330097	24.9994	39.2434	27.1583	81857.4	47.4232	41344.5	0.664161	0.000384775	0.335454	33.5984	36.2877	34.338
R306	A	I	iii	1	22	5		26.4463		31.6542	37014.2	6.97108e+10	3420.26	5.30968e-07	0.999999	4.90635e-08	33.5984	36.2877	34.338
R306	A	II	iii	1	31	6		22.1163	33.4232	28.471	398047	1085.44	19971.1	0.949758	0.00258991	0.0476518	33.5984	36.2877	34.338
R306	A	III	iii	1	63	11		21.657	32.1911	28.6968	512081	2105.79	17621.7	0.962905	0.00395968	0.0331354	33.5984	36.2877	34.338
R306	A	IV	iii	1	14	4		21.5493	29.636	28.1582	543269	8323.16	23751.7	0.944251	0.0144664	0.0412827	33.5984	36.2877	34.338
306_1	B	I	iii	1	58	9		34.9031		26.0762	357.797	6.97108e+10	75325.8	5.13259e-09	0.999999	1.08054e-06	33.5984	36.2877	34.338
306_1	B	II	iii	1	37	7		34.5009	37.0567	27.824	446.135	153.749	28587	0.0152855	0.00526773	0.979447	33.5984	36.2877	34.338
306_1	B	III	iii	1	26	3		32.9365	28.6957	27.3221	1052.31	13802.3	37756.3	0.0200018	0.262347	0.717651	33.5984	36.2877	34.338
306_9	B	I	iii	1	45	6		34.0348		28.2181	576.095	6.97108e+10	22976.5	8.26406e-09	1	3.29597e-07	33.5984	36.2877	34.338
306_9	B	II	iii	1	52	9		35.045	36.1754	28.1866	331.007	246.992	23380.6	0.0138158	0.0103091	0.975875	33.5984	36.2877	34.338
306_9	B	III	iii	1	42	7		34.028	37.9145	29.3205	578.247	96.9255	12470.9	0.0439864	0.00737298	0.948641	33.5984	36.2877	34.338
R30	C	I	iii	1	68	10	0.560284	22.1948	34.2044	31.8207	381268	713.045	3118.69	0.99005	0.00185158	0.0080984	33.5984	36.2877	34.338
R6	C	I	iii	1	57	10	0.413043	24.1141	38.1903	26.7605	133038	83.5626	51545.8	0.720419	0.000452504	0.279128	33.5984	36.2877	34.338
R306	C	I	iii	1	73	13		20.816	31.5581	27.0578	812286	2960.01	43713.8	0.945662	0.00344604	0.0508916	33.5984	36.2877	34.338
R306	C	II	iii	1	79	11		22.2064	34.8397	28.2735	378848	506.639	22281.2	0.943263	0.00126144	0.055476	33.5984	36.2877	34.338
R306	C	III	iii	1	47	9		21.7816	36.0582	27.8648	478263	263.071	27946.7	0.944301	0.000519417	0.0551791	33.5984	36.2877	34.338
R306	C	IV	iii	1	35	7		22.0003	33.5653	28.2721	424199	1005.58	22298.8	0.947924	0.00224708	0.0498293	33.5984	36.2877	34.338
306_1	D	I	iii	1	89	11		34.3484		29.4515	485.061	6.97108e+10	11597.2	6.95819e-09	1	1.66361e-07	33.5984	36.2877	34.338
306_1	D	II	iii	1	120	12		35.2393		26.8709	297.538	6.97108e+10	48485.9	4.26817e-09	0.999999	6.95529e-07	33.5984	36.2877	34.338
306_1	D	III	iii	1	95	12		34.491	35.6884	27.3547	448.552	320.965	37079.1	0.0118512	0.00848023	0.979669	33.5984	36.2877	34.338
306_9	D	I	iii	1	63	8		35.0757	37.5284	25.896	325.473	119.297	83238.8	0.00388934	0.00142557	0.994685	33.5984	36.2877	34.338
306_9	D	II	iii	1	105	11		35.389	39.8646	25.0805	274.08	33.9532	130812	0.0020903	0.000258947	0.997651	33.5984	36.2877	34.338
306_9	D	III	iii	1	88	10		36.0405	28.4443	26.0503	191.719	15800.3	76411.1	0.00207481	0.170994	0.826932	33.5984	36.2877	34.338
R30	E	I	iii	1	59	9	0.542553	27.3255	37.9673	34.296	22850.6	94.2095	790.792	0.962714	0.00396912	0.0333167	33.5984	36.2877	34.338
R6	E	I	iii	1	75	10	0.474962	23.9382		28.0843	146519	6.97108e+10	24746	2.10181e-06	0.999998	3.54979e-07	33.5984	36.2877	34.338
R306	E	I	iii	1	59	10		22.3554	39.0449	28.6527	349115	52.7677	18057.8	0.950683	0.000143693	0.0491735	33.5984	36.2877	34.338
R306	E	II	iii	1	29	5		22.5224	38.0771	29.4245	318556	88.806	11771.7	0.964104	0.00026877	0.035627	33.5984	36.2877	34.338
306_1	E	I	iii	1	80	12		34.7981	37.1885	26.8766	379.014	143.223	48332	0.00775807	0.00293164	0.98931	33.5984	36.2877	34.338
306_9	E	I	iii	1	70	12		36.0906		26.972	186.526	6.97108e+10	45841.9	2.6757e-09	0.999999	6.576e-07	33.5984	36.2877	34.338
306_1	F	II	iii	1	93	12		34.7189		28.0451	395.845	6.97108e+10	25288.5	5.67838e-09	1	3.62762e-07	33.5984	36.2877	34.338
306_1	F	III	iii	1	73	10		36.0475		27.5593	190.981	6.97108e+10	33103.8	2.73962e-09	1	4.74873e-07	33.5984	36.2877	34.338
306_1	F	IV	iii	1	72	10		36.3254		28.6443	163.981	6.97108e+10	18141.6	2.3523e-09	1	2.60241e-07	33.5984	36.2877	34.338
306_9	F	II	iii	1	74	10		35.6149		29.4575	242.136	6.97108e+10	11558.7	3.47344e-09	1	1.65809e-07	33.5984	36.2877	34.338
306_9	F	III	iii	1	76	10		35.9383		27.4887	202.775	6.97108e+10	34425	2.9088e-09	1	4.93825e-07	33.5984	36.2877	34.338
306_9	F	IV	iii	1	66	8		35.5366	38.9398	28.7478	252.769	55.8376	17130.3	0.0144945	0.00320189	0.982304	33.5984	36.2877	34.338
R30	A	I	iii	2	52	10	0.710145	22.0165	21.3254	31.5361	420430	727221	3651.68	0.365178	0.63165	0.00317178	25.4741	35.3779	35.311
R6	A	I	iii	2	63	11	0.25	23.5364	36.1671	24.3005	182642	248.103	201572	0.475059	0.000645324	0.524295	25.4741	35.3779	35.311
R306	A	I	iii	2	56	11		21.5868	24.2202	24.2935	532186	153264	202348	0.599445	0.172634	0.227921	25.4741	35.3779	35.311
R306	A	II	iii	2	40	8		20.9924	28.8183	29.5477	737378	12921.7	10994.9	0.968584	0.0169733	0.0144423	25.4741	35.3779	35.311
R306	A	III	iii	2	66	10		20.3225	24.9876	28.6978	1.0648e+06	101429	17611.2	0.899445	0.0856782	0.0148764	25.4741	35.3779	35.311
R306	A	IV	iii	2	68	11		22.1119	27.9744	28.644	399009	20344.9	18144.9	0.912023	0.0465028	0.0414742	25.4741	35.3779	35.311
306_1	B	I	iii	2	40	9		33.5083	22.4889	27.3447	769.012	388933	37285.3	0.00180102	0.910877	0.0873218	25.4741	35.3779	35.311
306_1	B	II	iii	2	56	11		34.0369	20.656	26.2525	575.441	1.04238e+06	68311.5	0.000517822	0.938011	0.0614715	25.4741	35.3779	35.311
306_1	B	III	iii	2	47	9		32.4118	20.8053	26.0697	1403.33	961970	75595	0.00135069	0.92589	0.0727596	25.4741	35.3779	35.311
306_9	B	I	iii	2	64	11		33.7129	35.6535	23.8147	687.386	327.048	263855	0.00259519	0.00123475	0.99617	25.4741	35.3779	35.311
306_9	B	II	iii	2	60	9		33.1236	23.2694	26.9219	949.688	255585	47133	0.0031274	0.84166	0.155213	25.4741	35.3779	35.311
306_9	B	III	iii	2	90	14		34.1098	33.8806	24.3971	552.891	848.71	191059	0.00287274	0.00440978	0.992717	25.4741	35.3779	35.311
R30	C	I	iii	2	53	10	0.776471	20.0228	21.8579	31.1627	1.2551e+06	546087	4491.5	0.695086	0.302427	0.00248743	25.4741	35.3779	35.311
R6	C	I	iii	2	41	8	0.52	23.17	35.5355	24.1137	223305	348.463	223553	0.499333	0.000779198	0.499888	25.4741	35.3779	35.311
R306	C	I	iii	2	66	10		20.5864	25.5449	26.0161	921294	75160.7	77874.7	0.857553	0.0699606	0.0724869	25.4741	35.3779	35.311
R306	C	II	iii	2	34	5		21.7295	28.3334	28.3117	492131	16771.9	21815	0.927293	0.0316024	0.0411048	25.4741	35.3779	35.311
R306	C	III	iii	2	68	11		20.1475	25.7729	27.4317	1.17211e+06	66482.9	35530.3	0.919935	0.0521793	0.027886	25.4741	35.3779	35.311
R306	C	IV	iii	2	64	9		20.0736	23.3149	25.2762	1.22062e+06	249406	117364	0.768948	0.157117	0.0739351	25.4741	35.3779	35.311
306_1	D	I	iii	2	83	14		32.7634	37.1706	23.5374	1157.18	144.61	307706	0.00374483	0.000467981	0.995787	25.4741	35.3779	35.311
306_1	D	II	iii	2	22	7		32.9432	24.524	25.7723	1048.47	130156	89144.5	0.0047582	0.590682	0.40456	25.4741	35.3779	35.311
306_1	D	III	iii	2	48	10		32.3023	26.1042	23.4819	1490.23	55632.6	317316	0.00397991	0.148576	0.847444	25.4741	35.3779	35.311
306_9	D	I	iii	2	61	10		32.3821	25.6057	24.1171	1426.37	72742.3	223136	0.00479765	0.244672	0.75053	25.4741	35.3779	35.311
306_9	D	II	iii	2	48	9		32.3938	34.5409	24.7601	1417.26	594.987	156230	0.0089563	0.00375998	0.987284	25.4741	35.3779	35.311
306_9	D	III	iii	2	64	6		34.3999	31.2181	24.7698	471.538	3554.01	155395	0.00295782	0.0222933	0.974749	25.4741	35.3779	35.311
R30	E	I	iii	2	73	11	0.539568	19.333	20.7333	31.1832	1.83239e+06	999934	4440.85	0.645943	0.352491	0.00156546	25.4741	35.3779	35.311
R6	E	I	iii	2	82	11	0.474359	20.0191	35.9746	22.6919	1.25765e+06	275.16	491684	0.718817	0.00015727	0.281026	25.4741	35.3779	35.311
R306	E	I	iii	2	101	12		18.1737	22.5124	24.5314	3.46101e+06	384043	177351	0.860433	0.095476	0.0440908	25.4741	35.3779	35.311
R306	E	II	iii	2	93	13		18.2473	24.7952	26.0012	3.32411e+06	112492	78522.3	0.945659	0.0320023	0.0223384	25.4741	35.3779	35.311
306_1	E	I	iii	2	48	7		33.9547	20.8043	24.594	601.981	962468	171302	0.000530673	0.848459	0.15101	25.4741	35.3779	35.311
306_9	E	I	iii	2	52	9		33.1128	34.1397	24.3852	955.35	738.287	192325	0.004924	0.00380523	0.991271	25.4741	35.3779	35.311
306_1	F	II	iii	2	76	11		34.3329	21.4053	25.6309	489.206	696628	96412.6	0.000616494	0.877885	0.121498	25.4741	35.3779	35.311
306_1	F	III	iii	2	88	13		33.3721	20.6651	24.812	828.674	1.03731e+06	151806	0.000696395	0.87173	0.127574	25.4741	35.3779	35.311
306_1	F	IV	iii	2	73	10		33.3766	21.5106	24.1583	826.606	658276	218101	0.00094232	0.750426	0.248632	25.4741	35.3779	35.311
306_9	F	II	iii	2	102	14		36.288	21.553	23.7949	167.376	643422	266778	0.000183856	0.706772	0.293044	25.4741	35.3779	35.311
306_9	F	III	iii	2	57	7		35.5033	23.0429	23.5214	257.42	288707	310441	0.000429459	0.481656	0.517915	25.4741	35.3779	35.311
306_9	F	IV	iii	2	101	13		33.852	22.3029	23.0385	636.862	429852	405727	0.000761601	0.514044	0.485194	25.4741	35.3779	35.311
R30	A	I	iii	3	54	12	0.861111	20.534	23.1264		948191	276019	1.4276e+11	6.64182e-06	1.93343e-06	0.999991	35.9038	36.3284	35.5142
R6	A	I	iii	3	70	11	0.421053	25.0845	38.1349	26.8329	78127.7	86.0879	49516.6	0.611661	0.000673982	0.387665	35.9038	36.3284	35.5142
R306	A	I	iii	3	83	10		20.0868	35.3337	25.9328	1.21179e+06	388.427	81557.5	0.936659	0.000300237	0.0630404	35.9038	36.3284	35.5142
R306	A	II	iii	3	83	11		21.2099	36.1066	29.9185	654447	256.309	8951.83	0.986125	0.000386208	0.0134887	35.9038	36.3284	35.5142
R306	A	III	iii	3	75	10		19.7416	27.1867	28.0218	1.46443e+06	31077.5	25618.1	0.962728	0.0204307	0.0168416	35.9038	36.3284	35.5142
R306	A	IV	iii	3	63	11		20.9107	32.039	32.1534	771179	2285.39	2593.51	0.993713	0.00294487	0.0033419	35.9038	36.3284	35.5142
306_1	B	I	iii	3	79	11		32.7936	19.8711	25.4555	1138.18	1.59e+06	106258	0.000670544	0.936729	0.0626003	35.9038	36.3284	35.5142
306_1	B	II	iii	3	61	9		33.4426	19.1274	25.8157	797.236	2.37198e+06	87026.8	0.000324106	0.964296	0.0353795	35.9038	36.3284	35.5142
306_1	B	III	iii	3	89	13		34.5758	19.6596	24.9295	428.173	1.78154e+06	142233	0.00022252	0.925859	0.0739182	35.9038	36.3284	35.5142
306_9	B	I	iii	3	47	10		36.5342	37.1778	26.8233	146.232	144.052	49783.4	0.00292033	0.00287681	0.994203	35.9038	36.3284	35.5142
306_9	B	II	iii	3	38	5		33.5681	23.6849	27.319	744.199	204394	37820.2	0.00306307	0.841272	0.155665	35.9038	36.3284	35.5142
306_9	B	III	iii	3	49	10		35.0657	34.3145	26.592	327.263	672.045	56591.9	0.00568252	0.0116692	0.982648	35.9038	36.3284	35.5142
R30	C	I	iii	3	92	10	0.953608	19.843	22.1202	33.2915	1.38524e+06	474225	1380.06	0.744414	0.254844	0.000741631	35.9038	36.3284	35.5142
R6	C	I	iii	3	68	11	0.535714	21.3631	33.8421	24.9799	601681	866.474	138315	0.812136	0.00116955	0.186694	35.9038	36.3284	35.5142
R306	C	I	iii	3	78	11		20.1737	35.9644	26.9934	1.15541e+06	276.674	45301.9	0.962049	0.000230373	0.0377207	35.9038	36.3284	35.5142
R306	C	II	iii	3	79	10		19.7519	24.2417	27.384	1.4562e+06	151499	36483.3	0.885668	0.0921427	0.0221894	35.9038	36.3284	35.5142
R306	C	III	iii	3	92	9		19.942	35.902	29.3531	1.312e+06	286.127	12247.4	0.990537	0.000216021	0.00924658	35.9038	36.3284	35.5142
R306	C	IV	iii	3	70	8		19.746	26.2044	28.1474	1.46092e+06	52714.7	23895	0.950174	0.0342852	0.0155411	35.9038	36.3284	35.5142
306_1	D	I	iii	3	87	10		34.5189	35.7909	25.2775	441.753	303.739	117280	0.00374286	0.0025735	0.993684	35.9038	36.3284	35.5142
306_1	D	II	iii	3	52	7		33.2085	21.5054	25.7904	906.462	660107	88253.8	0.0012098	0.881003	0.117787	35.9038	36.3284	35.5142
306_1	D	III	iii	3	62	10		34.9326	35.1224	25.2117	352.064	435.169	121634	0.00287583	0.00355467	0.993569	35.9038	36.3284	35.5142
306_9	D	I	iii	3	106	10		33.8585	37.0392	24.9902	634.602	155.2	137527	0.00458803	0.00112206	0.99429	35.9038	36.3284	35.5142
306_9	D	II	iii	3	79	9		35.0867	36.7643	26.1278	323.511	179.936	73200.3	0.00438934	0.00244134	0.993169	35.9038	36.3284	35.5142
306_9	D	III	iii	3	77	10		33.7101	35.1154	25.1854	688.418	436.809	123419	0.00552749	0.00350726	0.990965	35.9038	36.3284	35.5142
R30	E	I	iii	3	53	11	0.90625	22.3879	25.1549	35.6018	342935	92703.1	383.442	0.786509	0.212611	0.00087941	35.9038	36.3284	35.5142
R6	E	I	iii	3	59	10	0.506329	21.7253		26.2244	493262	6.97108e+10	69382.1	7.07577e-06	0.999992	9.95275e-07	35.9038	36.3284	35.5142
R306	E	I	iii	3	81	13		20.8979	24.3017	29.3538	776619	146690	12242.5	0.830119	0.156795	0.0130859	35.9038	36.3284	35.5142
R306	E	II	iii	3	65	10		21.2576	36.908	35.5629	637548	166.553	391.801	0.999125	0.000261011	0.000614006	35.9038	36.3284	35.5142
306_1	E	I	iii	3	68	12		33.061	20.3419	25.5056	982.869	1.23425e+06	103345	0.000734265	0.92206	0.0772054	35.9038	36.3284	35.5142
306_9	E	I	iii	3	71	11		28.2928	36.3575	26.2175	13441.6	223.945	69649.7	0.161334	0.00268793	0.835978	35.9038	36.3284	35.5142
306_1	F	II	iii	3	74	11		34.5181	23.0021	26.4473	441.94	295106	61317.1	0.00123839	0.82694	0.171821	35.9038	36.3284	35.5142
306_1	F	III	iii	3	88	12		33.6816	19.3993	25.9535	699.276	2.04933e+06	80625.5	0.000328198	0.961831	0.0378408	35.9038	36.3284	35.5142
306_1	F	IV	iii	3	84	11		33.2692	20.2872	26.2187	876.785	1.27114e+06	69601.1	0.000653527	0.947468	0.0518784	35.9038	36.3284	35.5142
306_9	F	II	iii	3	50	7		34.0328	22.0929	26.5641	576.75	481246	57475.5	0.00106944	0.892356	0.106575	35.9038	36.3284	35.5142
306_9	F	III	iii	3	83	12		34.4201	23.6659	26.0303	466.342	206504	77263.6	0.0016407	0.726528	0.271831	35.9038	36.3284	35.5142
306_9	F	IV	iii	3	78	11		35.0284	35.4802	26.2129	334.036	358.998	69826.6	0.00473678	0.00509075	0.990172	35.9038	36.3284	35.5142
R30	A	I	iv	0			0.0998217	21.6472	18.0314	38.1178	514855	4.27694e+06	95.0615	0.107443	0.892537	1.9838e-05			38.7222
R6	A	I	iv	0			0.107468	21.7382	36.5136	20.7976	489774	205.907	1.40511e+06	0.258443	0.000108653	0.741448			38.7222
R306	A	I	iv	0				19.4971	19.3011	22.5175	1.6746e+06	2.16046e+06	541584	0.382622	0.493634	0.123744			38.7222
R306	A	II	iv	0				19.8292	19.868	22.5485	1.39569e+06	1.59258e+06	532360	0.396433	0.452356	0.151211			38.7222
R306	A	III	iv	0				19.9654	20.0647	22.9481	1.29525e+06	1.43269e+06	426571	0.410602	0.454172	0.135226			38.7222
R306	A	IV	iv	0				20.0421	19.6789	22.5129	1.24185e+06	1.76313e+06	542972	0.350019	0.496943	0.153038			38.7222
306_1	B	I	iv	0					19.8691	22.2798	7.39351e+10	1.59169e+06	617867	0.99997	2.15275e-05	8.35663e-06			38.7222
306_1	B	II	iv	0				36.583	19.46	22.0524	142.369	1.9835e+06	700853	5.3034e-05	0.738872	0.261075			38.7222
306_1	B	III	iv	0				36.57	18.7218	21.3287	143.393	2.95037e+06	1.04679e+06	3.58725e-05	0.73809	0.261874			38.7222
306_9	B	I	iv	0				37.2481	22.0332	21.0788	98.8503	496952	1.20235e+06	5.81677e-05	0.292427	0.707514			38.7222
306_9	B	II	iv	0					20.9425	20.3853	7.39351e+10	893540	1.7659e+06	0.999964	1.2085e-05	2.38837e-05			38.7222
306_9	B	III	iv	0				38.1808	21.9572	21.2147	59.2595	517693	1.11505e+06	3.62931e-05	0.317057	0.682907			38.7222
R30	C	I	iv	0			0.215385	21.6238	19.4313	36.1018	521509	2.01427e+06	290.623	0.205637	0.794249	0.000114596			38.7222
R6	C	I	iv	0			0.0980392	21.699	33.6726	20.8621	500426	949.147	1.3558e+06	0.269455	0.00051107	0.730034			38.7222
R306	C	I	iv	0				20.8964	20.643	21.8438	777238	1.0497e+06	786790	0.297368	0.401609	0.301023			38.7222
R306	C	II	iv	0				19.6633	21.5011	22.2033	1.52871e+06	661636	644637	0.539231	0.233383	0.227387			38.7222
R306	C	III	iv	0				19.3017	21.0306	21.9847	1.86411e+06	852159	727663	0.541274	0.247438	0.211288			38.7222
R306	C	IV	iv	0				19.668	21.0277	22.1513	1.52479e+06	853494	663480	0.501285	0.280592	0.218123			38.7222
306_1	D	I	iv	0				34.2531	21.5097	21.7986	511.072	658589	806757	0.000348651	0.449286	0.550365			38.7222
306_1	D	II	iv	0				35.5088	20.687	21.6031	256.647	1.02515e+06	899090	0.000133358	0.532685	0.467182			38.7222
306_1	D	III	iv	0				36.7815	20.1788	21.5922	127.682	1.34745e+06	904538	5.66941e-05	0.598305	0.401639			38.7222
306_9	D	I	iv	0				36.1499	23.0658	21.0487	180.554	285175	1.22258e+06	0.000119736	0.189116	0.810764			38.7222
306_9	D	II	iv	0				37.7573	22.4818	20.4119	74.7591	390423	1.74011e+06	3.50882e-05	0.183245	0.81672			38.7222
306_9	D	III	iv	0				35.051	22.8256	21.0654	329.908	324502	1.21131e+06	0.000214765	0.211246	0.78854			38.7222
R30	E	I	iv	0			0.0976645	23.4574	20.0337	31.9633	190739	1.45683e+06	2881.79	0.115568	0.882686	0.00174605			38.7222
R6	E	I	iv	0			0.0903084	22.684	36.5522	21.5027	291533	201.682	950547	0.234675	0.000162348	0.765162			38.7222
R306	E	I	iv	0				19.4462	19.0773	22.5296	1.72209e+06	2.43676e+06	537949	0.366652	0.518813	0.114535			38.7222
R306	E	II	iv	0				26.9968	20.3126	23.2403	27365.7	1.25386e+06	362793	0.0166456	0.76268	0.220674			38.7222
306_1	E	I	iv	0				37.4004	20.6493	24.1871	90.9247	1.04618e+06	214650	7.21098e-05	0.829695	0.170233			38.7222
306_9	E	I	iv	0				38.2139	21.4089	21.7897	58.1935	695263	810725	3.86399e-05	0.461648	0.538313			38.7222
306_1	F	II	iv	0				36.8057	20.1874	23.0663	125.998	1.3412e+06	399524	7.23774e-05	0.770428	0.229499			38.7222
306_1	F	III	iv	0				36.7858	19.9637	22.0456	127.38	1.51267e+06	703533	5.74734e-05	0.682512	0.317431			38.7222
306_1	F	IV	iv	0				38.1723	19.5868	22.6251	59.5382	1.85269e+06	510235	2.51961e-05	0.784047	0.215928			38.7222
306_9	F	II	iv	0				36.3206	21.8801	21.6048	164.409	539613	898257	0.000114329	0.375244	0.624642			38.7222
306_9	F	III	iv	0				35.6856	22.2474	23.7047	232.928	442881	280446	0.000321919	0.612086	0.387592			38.7222
306_9	F	IV	iv	0				35.0078	22.6207	22.1733	337.832	362311	655431	0.000331832	0.355877	0.643791			38.7222
R30	A	I	iv	1	25	6	0.333333	22.9799	20.3494	33.5586	247850	1.2293e+06	1190.15	0.167654	0.831541	0.00080506
R6	A	I	iv	1	25	8	0.330097	24.1794	28.9831	27.5429	128356	11825.3	33406.1	0.739432	0.0681228	0.192445
R306	A	I	iv	1	22	5		25.9444	27.9069	32.164	48744.5	21096.2	2578.24	0.67309	0.291308	0.0356017
R306	A	II	iv	1	31	6		21.4243	22.1873	28.8897	581817	457438	15834.8	0.551438	0.433554	0.015008
R306	A	III	iv	1	63	11		21.1573	22.6097	29.0782	673590	364453	14263.3	0.640108	0.346338	0.0135543
R306	A	IV	iv	1	14	4		20.8618	22.8508	28.4362	792115	320133	20359.5	0.699373	0.282651	0.0179757
306_1	B	I	iv	1	58	9		34.0951	20.2003	26.4844	557.352	1.33194e+06	60068.8	0.000400234	0.956464	0.0431354
306_1	B	II	iv	1	37	7		33.556	21.7297	28.37	749.138	585066	21120.8	0.00123429	0.963967	0.034799
306_1	B	III	iv	1	26	3		32.5208	20.2851	27.7807	1321.91	1.27257e+06	29281.1	0.00101437	0.976517	0.022469
306_9	B	I	iv	1	45	6		34.1679	28.5393	28.5278	535.527	15013.5	19352.3	0.015344	0.430171	0.554485
306_9	B	II	iv	1	52	9		32.9679	24.436	28.6098	1034.39	136463	18492.2	0.00663118	0.874821	0.118548
306_9	B	III	iv	1	42	7		33.1643	26.515	29.7181	928.706	44602.9	10004	0.0167227	0.80314	0.180137
R30	C	I	iv	1	68	10	0.560284	21.4965	20.4523	32.3805	559224	1.16311e+06	2286.69	0.324258	0.674416	0.0013259
R6	C	I	iv	1	57	10	0.413043	23.5374	34.0054	27.2061	182547	793.58	40264.4	0.816381	0.00354903	0.18007
R306	C	I	iv	1	73	13		20.6935	22.4144	27.3621	868733	404829	36929.3	0.662906	0.308914	0.0281798
R306	C	II	iv	1	79	11		21.3265	23.1014	28.2649	613884	279759	22387.5	0.670157	0.305404	0.0244397
R306	C	III	iv	1	47	9		21.458	24.3065	28.2132	571171	146311	23038.4	0.77131	0.197579	0.0311112
R306	C	IV	iv	1	35	7		21.5494	23.2452	28.5282	543221	258943	19347.4	0.661246	0.315204	0.0235509
306_1	D	I	iv	1	89	11		34.7199	23.3899	30.1593	395.632	239543	7833.59	0.00159676	0.966787	0.0316161
306_1	D	II	iv	1	120	12		33.393	20.6539	27.1128	819.22	1.04356e+06	42401.1	0.000753802	0.960231	0.0390152
306_1	D	III	iv	1	95	12		33.5787	19.3622	27.8583	739.882	2.0906e+06	28048.4	0.000349103	0.986417	0.0132342
306_9	D	I	iv	1	63	8		33.7675	22.0337	26.1612	667.1	496826	71855.9	0.00117169	0.872621	0.126207
306_9	D	II	iv	1	105	11		33.9027	28.3029	25.2915	619.416	17049.6	116368	0.00462122	0.1272	0.868179
306_9	D	III	iv	1	88	10		33.4976	23.4345	26.0604	773.553	233873	75986.2	0.00249025	0.752892	0.244617
R30	E	I	iv	1	59	9	0.542553	27.4531	28.9228	35.0487	21305.9	12215.3	521.022	0.625867	0.358828	0.0153052
R6	E	I	iv	1	75	10	0.474962	23.1332	34.8722	28.1902	227853	497.862	23334	0.905311	0.00197811	0.0927112
R306	E	I	iv	1	59	10		21.6495	22.4936	28.3469	514200	387940	21393.4	0.556775	0.420061	0.0231647
R306	E	II	iv	1	29	5		21.8755	25.6577	29.7334	454262	70734.7	9919.33	0.849221	0.132235	0.0185437
306_1	E	I	iv	1	80	12		33.0878	20.3733	27.0561	968.532	1.21362e+06	43754.9	0.000769689	0.964458	0.0347719
306_9	E	I	iv	1	70	12		33.339	24.1005	27.0437	843.828	163458	44056.3	0.0040499	0.784505	0.211445
306_1	F	II	iv	1	93	12		34.8557	22.563	28.1571	367.227	373725	23766.4	0.00092301	0.939341	0.0597359
306_1	F	III	iv	1	73	10		34.199	22.6118	28.2826	526.49	364047	22169.3	0.00136135	0.941315	0.0573232
306_1	F	IV	iv	1	72	10		33.7211	22.9324	28.8785	684.28	306378	15933.1	0.00211855	0.948552	0.0493292
306_9	F	II	iv	1	74	10		33.8101	26.2202	29.7345	651.685	52266.6	9913.55	0.0103719	0.831849	0.157779
306_9	F	III	iv	1	76	10		34.3395	25.8879	27.8465	487.437	62496.1	28231.8	0.00534381	0.685149	0.309507
306_9	F	IV	iv	1	66	8		34.4898	26.1009	29.1349	448.854	55731.6	13822.1	0.00641196	0.796136	0.197452
R30	A	I	iv	2	52	10	0.710145	21.3456	21.0443	31.714	607473	845895	3308.75	0.417026	0.580702	0.00227144
R6	A	I	iv	2	63	11	0.25	22.168	36.7486	24.0798	386920	181.465	227801	0.629238	0.000295111	0.370467
R306	A	I	iv	2	56	11		19.9451	23.8482	24.0036	1.30974e+06	187208	237629	0.755078	0.107927	0.136995
R306	A	II	iv	2	40	8		20.4397	28.3745	27.9217	998529	16405.3	27079.4	0.958269	0.0157438	0.0259876
R306	A	III	iv	2	66	10		19.7256	24.7758	26.7858	1.47737e+06	113668	50827	0.899812	0.069231	0.0309569
R306	A	IV	iv	2	68	11			27.5052	29.0469	7.39351e+10	26184.7	14512.7	0.999999	3.54158e-07	1.9629e-07
306_1	B	I	iv	2	40	9		37.0968	22.612	29.3128	107.406	364004	12524	0.000285173	0.966462	0.0332524
306_1	B	II	iv	2	56	11		35.3695	21.1603	26.4772	277.023	794753	60309.5	0.000323875	0.929167	0.0705095
306_1	B	III	iv	2	47	9		35.4652	20.8991	25.4215	262.865	914620	108279	0.000256914	0.893915	0.105828
306_9	B	I	iv	2	64	11		34.5187	33.9613	23.8479	441.788	812.658	259048	0.00169721	0.00312197	0.995181
306_9	B	II	iv	2	60	9		33.8436	23.1804	24.8897	639.814	268126	145403	0.00154481	0.647383	0.351073
306_9	B	III	iv	2	90	14		35.3563	35.6068	24.2472	279.042	335.352	207610	0.0013401	0.00161054	0.997049
R30	C	I	iv	2	53	10	0.776471	19.7327	22.0658	31.1919	1.47163e+06	488325	4419.29	0.74916	0.248591	0.00224972
R6	C	I	iv	2	41	8	0.52	22.931	37.3188	24.1582	254583	133.533	218113	0.538424	0.000282413	0.461294
R306	C	I	iv	2	66	10		19.1977	25.2912	25.433	1.9735e+06	86148.9	107590	0.910606	0.0397505	0.0496435
R306	C	II	iv	2	34	5		22	28.2172	27.947	424259	17853.4	26702.3	0.904961	0.038082	0.056957
R306	C	III	iv	2	68	11		19.8618	26.0307	27.0057	1.37096e+06	57874.5	44993.9	0.930203	0.039268	0.0305285
R306	C	IV	iv	2	64	9		19.9636	23.3127	25.6654	1.29656e+06	249699	94585.9	0.790178	0.152177	0.0576446
306_1	D	I	iv	2	83	14		34.8964	35.6423	24.0198	359.115	329.014	235506	0.00152042	0.00139298	0.997087
306_1	D	II	iv	2	22	7		36.2872	24.3763	25.824	167.453	140916	86627.4	0.000735373	0.618838	0.380427
306_1	D	III	iv	2	48	10		32.958	26.5954	23.799	1039.98	42715.7	266168	0.00335561	0.137827	0.858818
306_9	D	I	iv	2	61	10		32.0714	25.9014	24.2472	1691.4	62045.9	207613	0.00623327	0.228656	0.765111
306_9	D	II	iv	2	48	9		32.6508	37.6272	25.1075	1230.92	113.122	128870	0.00945306	0.000868741	0.989678
306_9	D	III	iv	2	64	6		33.3464	31.2102	24.8619	840.412	3569.2	147658	0.00552657	0.0234711	0.971002
R30	E	I	iv	2	73	11	0.539568	21.0975	20.5971	31.757	696048	1.07595e+06	3230.77	0.39209	0.60609	0.00181992
R6	E	I	iv	2	82	11	0.474359	19.0821	34.1486	22.9854	2.10274e+06	734.772	417851	0.833982	0.000291422	0.165726
R306	E	I	iv	2	101	12		18.1871	22.171	24.7335	3.43565e+06	461458	158551	0.847125	0.113781	0.0390938
R306	E	II	iv	2	93	13		18.3126	24.8861	29.4551	3.20707e+06	107122	11574.1	0.96431	0.0322097	0.00348012
306_1	E	I	iv	2	48	7		33.0204	21.1859	24.8397	1005.01	783864	149491	0.00107561	0.838932	0.159993
306_9	E	I	iv	2	52	9		33.1997	35.849	24.7033	910.881	294.399	161228	0.00560771	0.00181242	0.99258
306_1	F	II	iv	2	76	11		35.1638	22.1388	25.9915	310.127	469516	78943.7	0.000565132	0.855579	0.143856
306_1	F	III	iv	2	88	13			21.082	24.978	7.39351e+10	828939	138460	0.999987	1.12116e-05	1.8727e-06
306_1	F	IV	iv	2	73	10		36.1228	21.7221	24.3365	183.254	587492	197587	0.000233366	0.748147	0.251619
306_9	F	II	iv	2	102	14		35.9887	21.6541	24.3934	197.244	609378	191449	0.000246239	0.760748	0.239006
306_9	F	III	iv	2	57	7			23.1933	23.8722	7.39351e+10	266273	255585	0.999993	3.60142e-06	3.45685e-06
306_9	F	IV	iv	2	101	13		35.8822	22.8545	23.5268	209.115	319497	309514	0.00033234	0.507767	0.491901
R30	A	I	iv	3	54	12	0.861111	19.7169	21.8679	33.0263	1.48438e+06	543169	1598.61	0.731529	0.267683	0.000787821
R6	A	I	iv	3	70	11	0.421053	23.9066	35.281	26.4855	149081	399.601	60032.2	0.71156	0.00190728	0.286532
R306	A	I	iv	3	83	10		19.9637	35.6842	25.9381	1.29648e+06	321.675	81318.7	0.94076	0.000233415	0.0590068
R306	A	II	iv	3	83	11		21.1486	37.3785	29.0941	676824	129.314	14138.3	0.979355	0.000187116	0.020458
R306	A	III	iv	3	75	10		19.7053	26.8839	27.3176	1.4939e+06	36574.7	37850.5	0.952545	0.0233209	0.0241344
R306	A	IV	iv	3	63	11		20.6648	30.7904	31.6154	882553	4473.2	3494.75	0.991052	0.00502312	0.00392439
306_1	B	I	iv	3	79	11		33.504	19.4827	25.1127	770.821	1.95934e+06	128493	0.00036906	0.93811	0.061521
306_1	B	II	iv	3	61	9		33.5025	19.1789	26.114	771.447	2.30715e+06	73761.2	0.000323908	0.968706	0.0309702
306_1	B	III	iv	3	89	13		34.4163	19.582	25.3528	467.311	1.85748e+06	112485	0.000237162	0.942676	0.0570865
306_9	B	I	iv	3	47	10		36.7641	38.1165	27.0984	128.911	86.9425	42741.8	0.0030009	0.00202391	0.994975
306_9	B	II	iv	3	38	5		34.4869	23.3688	27.3136	449.566	242278	37934.4	0.0016018	0.863238	0.135161
306_9	B	III	iv	3	49	10		34.771	34.7777	27.1981	384.686	523.834	40443.3	0.00930275	0.0126677	0.97803
R30	C	I	iv	3	92	10	0.953608	19.9478	21.7745	33.3051	1.30782e+06	571156	1369.69	0.69552	0.303751	0.000728427
R6	C	I	iv	3	68	11	0.535714	21.2478	33.2207	24.9357	640973	1210.3	141745	0.817642	0.0015439	0.180814
R306	C	I	iv	3	78	11		19.499	35.3531	26.9153	1.67286e+06	384.385	47306.4	0.972282	0.000223408	0.0274949
R306	C	II	iv	3	79	10		19.72	23.974	27.6168	1.48193e+06	174960	32065.1	0.877424	0.103591	0.0189852
R306	C	III	iv	3	92	9		20.3407	35.0049	28.8166	1.05423e+06	463.571	16488.9	0.984174	0.000432766	0.0153932
R306	C	IV	iv	3	70	8		19.6632	25.9778	27.872	1.52881e+06	59545.8	27836.2	0.945933	0.0368433	0.0172233
306_1	D	I	iv	3	87	10		36.1627	35.6803	25.638	179.285	322.354	96034.5	0.00185718	0.0033392	0.994804
306_1	D	II	iv	3	52	7		34.4564	22.7651	26.1099	457.146	335224	73927.7	0.00111605	0.8184	0.180484
306_1	D	III	iv	3	62	10		35.9645	35.3698	25.3749	199.877	380.956	111115	0.00178947	0.00341065	0.9948
306_9	D	I	iv	3	106	10		34.137	36.023	25.3632	544.705	268.09	111834	0.00483553	0.00237992	0.992785
306_9	D	II	iv	3	79	9		34.6548	36.3432	26.2863	410.011	225.671	67044.3	0.00605809	0.00333438	0.990608
306_9	D	III	iv	3	77	10		34.054	35.5974	25.4606	570.067	337.053	105956	0.00533456	0.00315407	0.991511
R30	E	I	iv	3	53	11	0.90625	22.1925	25.1296	35.663	381748	93971.7	370.667	0.801839	0.197382	0.000778564
R6	E	I	iv	3	59	10	0.506329	21.5261	34.9232	26.471	550230	484.393	60518.2	0.900197	0.000792486	0.0990102
R306	E	I	iv	3	81	13		20.5653	23.7469	29.3724	932033	197699	12117.2	0.816249	0.173139	0.0106119
R306	E	II	iv	3	65	10		21.1093	36.472	35.0745	691559	210.572	513.632	0.998954	0.000304171	0.000741939
306_1	E	I	iv	3	68	12		32.8872	20.3298	25.7555	1081.19	1.24231e+06	89979.6	0.000810869	0.931706	0.0674829
306_9	E	I	iv	3	71	11		28.214	36.9831	26.3328	14035.6	159.955	65336.9	0.176476	0.00201119	0.821512
306_1	F	II	iv	3	74	11		35.6497	22.655	27.1807	237.564	355692	40835.2	0.000598753	0.896481	0.10292
306_1	F	III	iv	3	88	12		34.7781	19.8686	26.0222	383.195	1.59207e+06	77613.4	0.000229448	0.953297	0.0464731
306_1	F	IV	iv	3	84	11		33.5921	20.5602	26.6538	734.448	1.09755e+06	54686.3	0.000637007	0.951932	0.0474309
306_9	F	II	iv	3	50	7		34.376	22.5771	27.2462	477.776	370914	39379.6	0.00116312	0.902969	0.0958674
306_9	F	III	iv	3	83	12		34.3499	23.6471	26.4259	484.643	208595	62050.5	0.00178749	0.769354	0.228859
306_9	F	IV	iv	3	78	11		35.2576	35.2937	26.5896	294.561	396.873	56666.4	0.00513551	0.00691926	0.987945
R30	A	I	v	0			0.0998217			38.1942			91.116						38.7222
R6	A	I	v	0			0.107468			21.54			931078						38.7222
R306	A	I	v	0						23.4348			325704						38.7222
R306	A	II	v	0						23.3667			338242						38.7222
R306	A	III	v	0						23.5107			312298						38.7222
R306	A	IV	v	0						24.0114			236599						38.7222
306_1	B	I	v	0						23.0242			408964						38.7222
306_1	B	II	v	0						22.6432			505125						38.7222
306_1	B	III	v	0						21.7975			807252						38.7222
306_9	B	I	v	0						21.1371			1.16408e+06						38.7222
306_9	B	II	v	0						20.8071			1.39777e+06						38.7222
306_9	B	III	v	0						21.5032			950302						38.7222
R30	C	I	v	0			0.215385			36.8618			190.712						38.7222
R6	C	I	v	0			0.0980392			21.0645			1.21193e+06						38.7222
R306	C	I	v	0						22.3696			587862						38.7222
R306	C	II	v	0						23.1272			386262						38.7222
R306	C	III	v	0						22.7247			482818						38.7222
R306	C	IV	v	0						22.7774			468924						38.7222
306_1	D	I	v	0						22.2465			629384						38.7222
306_1	D	II	v	0						22.5385			535311						38.7222
306_1	D	III	v	0						22.1613			659813						38.7222
306_9	D	I	v	0						21.3835			1.0155e+06						38.7222
306_9	D	II	v	0						20.9694			1.27747e+06						38.7222
306_9	D	III	v	0						21.7353			835577						38.7222
R30	E	I	v	0			0.0976645			33.8577			1008.31						38.7222
R6	E	I	v	0			0.0903084			22.3085			608113						38.7222
R306	E	I	v	0						28.204			23156.4						38.7222
R306	E	II	v	0						23.7506			273411						38.7222
306_1	E	I	v	0						25.0512			132948						38.7222
306_9	E	I	v	0						22.4829			552064						38.7222
306_1	F	II	v	0						23.0541			402228						38.7222
306_1	F	III	v	0						22.3958			579373						38.7222
306_1	F	IV	v	0						23.3179			347510						38.7222
306_9	F	II	v	0						22.0925			685446						38.7222
306_9	F	III	v	0						23.0716			398364						38.7222
306_9	F	IV	v	0						22.424			570410						38.7222
R30	A	I	v	1	25	6	0.333333
R6	A	I	v	1	25	8	0.330097
R306	A	I	v	1	22	5
R306	A	II	v	1	31	6
R306	A	III	v	1	63	11
R306	A	IV	v	1	14	4
306_1	B	I	v	1	58	9
306_1	B	II	v	1	37	7
306_1	B	III	v	1	26	3
306_9	B	I	v	1	45	6
306_9	B	II	v	1	52	9
306_9	B	III	v	1	42	7
R30	C	I	v	1	68	10	0.560284
R6	C	I	v	1	57	10	0.413043
R306	C	I	v	1	73	13
R306	C	II	v	1	79	11
R306	C	III	v	1	47	9
R306	C	IV	v	1	35	7
306_1	D	I	v	1	89	11
306_1	D	II	v	1	120	12
306_1	D	III	v	1	95	12
306_9	D	I	v	1	63	8
306_9	D	II	v	1	105	11
306_9	D	III	v	1	88	10
R30	E	I	v	1	59	9	0.542553
R6	E	I	v	1	75	10	0.474962
R306	E	I	v	1	59	10
R306	E	II	v	1	29	5
306_1	E	I	v	1	80	12
306_9	E	I	v	1	70	12
306_1	F	II	v	1	93	12
306_1	F	III	v	1	73	10
306_1	F	IV	v	1	72	10
306_9	F	II	v	1	74	10
306_9	F	III	v	1	76	10
306_9	F	IV	v	1	66	8
R30	A	I	v	2	52	10	0.710145
R6	A	I	v	2	63	11	0.25
R306	A	I	v	2	56	11
R306	A	II	v	2	40	8
R306	A	III	v	2	66	10
R306	A	IV	v	2	68	11
306_1	B	I	v	2	40	9
306_1	B	II	v	2	56	11
306_1	B	III	v	2	47	9
306_9	B	I	v	2	64	11
306_9	B	II	v	2	60	9
306_9	B	III	v	2	90	14
R30	C	I	v	2	53	10	0.776471
R6	C	I	v	2	41	8	0.52
R306	C	I	v	2	66	10
R306	C	II	v	2	34	5
R306	C	III	v	2	68	11
R306	C	IV	v	2	64	9
306_1	D	I	v	2	83	14
306_1	D	II	v	2	22	7
306_1	D	III	v	2	48	10
306_9	D	I	v	2	61	10
306_9	D	II	v	2	48	9
306_9	D	III	v	2	64	6
R30	E	I	v	2	73	11	0.539568
R6	E	I	v	2	82	11	0.474359
R306	E	I	v	2	101	12
R306	E	II	v	2	93	13
306_1	E	I	v	2	48	7
306_9	E	I	v	2	52	9
306_1	F	II	v	2	76	11
306_1	F	III	v	2	88	13
306_1	F	IV	v	2	73	10
306_9	F	II	v	2	102	14
306_9	F	III	v	2	57	7
306_9	F	IV	v	2	101	13
R30	A	I	v	3	54	12	0.861111
R6	A	I	v	3	70	11	0.421053
R306	A	I	v	3	83	10
R306	A	II	v	3	83	11
R306	A	III	v	3	75	10
R306	A	IV	v	3	63	11
306_1	B	I	v	3	79	11
306_1	B	II	v	3	61	9
306_1	B	III	v	3	89	13
306_9	B	I	v	3	47	10
306_9	B	II	v	3	38	5
306_9	B	III	v	3	49	10
R30	C	I	v	3	92	10	0.953608
R6	C	I	v	3	68	11	0.535714
R306	C	I	v	3	78	11
R306	C	II	v	3	79	10
R306	C	III	v	3	92	9
R306	C	IV	v	3	70	8
306_1	D	I	v	3	87	10
306_1	D	II	v	3	52	7
306_1	D	III	v	3	62	10
306_9	D	I	v	3	106	10
306_9	D	II	v	3	79	9
306_9	D	III	v	3	77	10
R30	E	I	v	3	53	11	0.90625
R6	E	I	v	3	59	10	0.506329
R306	E	I	v	3	81	13
R306	E	II	v	3	65	10
306_1	E	I	v	3	68	12
306_9	E	I	v	3	71	11
306_1	F	II	v	3	74	11
306_1	F	III	v	3	88	12
306_1	F	IV	v	3	84	11
306_9	F	II	v	3	50	7
306_9	F	III	v	3	83	12
306_9	F	IV	v	3	78	11
R30	A	I	vi	0			0.0998217			37.1002			167.098
R6	A	I	vi	0			0.107468			21.2507			1.09305e+06
R306	A	I	vi	0						23.3302			345145
R306	A	II	vi	0						23.1792			375293
R306	A	III	vi	0						23.6286			292534
R306	A	IV	vi	0						23.4081			330568
306_1	B	I	vi	0						23.28			354885
306_1	B	II	vi	0						22.8573			448614
306_1	B	III	vi	0						22.2836			616569
306_9	B	I	vi	0						21.3981			1.00728e+06
306_9	B	II	vi	0						21.1953			1.12712e+06
306_9	B	III	vi	0						21.888			767740
R30	C	I	vi	0			0.215385			36.5224			230.19
R6	C	I	vi	0			0.0980392			20.9993			1.25647e+06
R306	C	I	vi	0						22.4943			548600
R306	C	II	vi	0						23.1998			371031
R306	C	III	vi	0						22.7683			471286
R306	C	IV	vi	0						23.2077			369405
306_1	D	I	vi	0						22.6114			514119
306_1	D	II	vi	0						22.5436			533800
306_1	D	III	vi	0						22.5299			537871
306_9	D	I	vi	0						21.7281			838898
306_9	D	II	vi	0						21.1488			1.1566e+06
306_9	D	III	vi	0						22.0804			690088
R30	E	I	vi	0			0.0976645			33.8577			1008.3
R6	E	I	vi	0			0.0903084			22.5917			519747
R306	E	I	vi	0						23.5993			297326
R306	E	II	vi	0						24.103			224893
306_1	E	I	vi	0						25.4837			104609
306_9	E	I	vi	0						22.5752			524532
306_1	F	II	vi	0						24.0897			226549
306_1	F	III	vi	0						23.1886			373342
306_1	F	IV	vi	0						23.575			301360
306_9	F	II	vi	0						23.1089			390202
306_9	F	III	vi	0						23.6796			284373
306_9	F	IV	vi	0						23.226			365687
R30	A	I	vi	1	25	6	0.333333
R6	A	I	vi	1	25	8	0.330097
R306	A	I	vi	1	22	5
R306	A	II	vi	1	31	6
R306	A	III	vi	1	63	11
R306	A	IV	vi	1	14	4
306_1	B	I	vi	1	58	9
306_1	B	II	vi	1	37	7
306_1	B	III	vi	1	26	3
306_9	B	I	vi	1	45	6
306_9	B	II	vi	1	52	9
306_9	B	III	vi	1	42	7
R30	C	I	vi	1	68	10	0.560284
R6	C	I	vi	1	57	10	0.413043
R306	C	I	vi	1	73	13
R306	C	II	vi	1	79	11
R306	C	III	vi	1	47	9
R306	C	IV	vi	1	35	7
306_1	D	I	vi	1	89	11
306_1	D	II	vi	1	120	12
306_1	D	III	vi	1	95	12
306_9	D	I	vi	1	63	8
306_9	D	II	vi	1	105	11
306_9	D	III	vi	1	88	10
R30	E	I	vi	1	59	9	0.542553
R6	E	I	vi	1	75	10	0.474962
R306	E	I	vi	1	59	10
R306	E	II	vi	1	29	5
306_1	E	I	vi	1	80	12
306_9	E	I	vi	1	70	12
306_1	F	II	vi	1	93	12
306_1	F	III	vi	1	73	10
306_1	F	IV	vi	1	72	10
306_9	F	II	vi	1	74	10
306_9	F	III	vi	1	76	10
306_9	F	IV	vi	1	66	8
R30	A	I	vi	2	52	10	0.710145
R6	A	I	vi	2	63	11	0.25
R306	A	I	vi	2	56	11
R306	A	II	vi	2	40	8
R306	A	III	vi	2	66	10
R306	A	IV	vi	2	68	11
306_1	B	I	vi	2	40	9
306_1	B	II	vi	2	56	11
306_1	B	III	vi	2	47	9
306_9	B	I	vi	2	64	11
306_9	B	II	vi	2	60	9
306_9	B	III	vi	2	90	14
R30	C	I	vi	2	53	10	0.776471
R6	C	I	vi	2	41	8	0.52
R306	C	I	vi	2	66	10
R306	C	II	vi	2	34	5
R306	C	III	vi	2	68	11
R306	C	IV	vi	2	64	9
306_1	D	I	vi	2	83	14
306_1	D	II	vi	2	22	7
306_1	D	III	vi	2	48	10
306_9	D	I	vi	2	61	10
306_9	D	II	vi	2	48	9
306_9	D	III	vi	2	64	6
R30	E	I	vi	2	73	11	0.539568
R6	E	I	vi	2	82	11	0.474359
R306	E	I	vi	2	101	12
R306	E	II	vi	2	93	13
306_1	E	I	vi	2	48	7
306_9	E	I	vi	2	52	9
306_1	F	II	vi	2	76	11
306_1	F	III	vi	2	88	13
306_1	F	IV	vi	2	73	10
306_9	F	II	vi	2	102	14
306_9	F	III	vi	2	57	7
306_9	F	IV	vi	2	101	13
R30	A	I	vi	3	54	12	0.861111
R6	A	I	vi	3	70	11	0.421053
R306	A	I	vi	3	83	10
R306	A	II	vi	3	83	11
R306	A	III	vi	3	75	10
R306	A	IV	vi	3	63	11
306_1	B	I	vi	3	79	11
306_1	B	II	vi	3	61	9
306_1	B	III	vi	3	89	13
306_9	B	I	vi	3	47	10
306_9	B	II	vi	3	38	5
306_9	B	III	vi	3	49	10
R30	C	I	vi	3	92	10	0.953608
R6	C	I	vi	3	68	11	0.535714
R306	C	I	vi	3	78	11
R306	C	II	vi	3	79	10
R306	C	III	vi	3	92	9
R306	C	IV	vi	3	70	8
306_1	D	I	vi	3	87	10
306_1	D	II	vi	3	52	7
306_1	D	III	vi	3	62	10
306_9	D	I	vi	3	106	10
306_9	D	II	vi	3	79	9
306_9	D	III	vi	3	77	10
R30	E	I	vi	3	53	11	0.90625
R6	E	I	vi	3	59	10	0.506329
R306	E	I	vi	3	81	13
R306	E	II	vi	3	65	10
306_1	E	I	vi	3	68	12
306_9	E	I	vi	3	71	11
306_1	F	II	vi	3	74	11
306_1	F	III	vi	3	88	12
306_1	F	IV	vi	3	84	11
306_9	F	II	vi	3	50	7
306_9	F	III	vi	3	83	12
306_9	F	IV	vi	3	78	11

## Sheet: Primers
Primers used in this study
Locus	Genotype Specificity	Primers	source
DsRed	DsRed - wildtype MAFF303099	5ʹ-CCCCGTAATGCAGAAGAAGACT-3ʹ 5ʹ-GATTGACTTGAACTCCACCAGGT-3’	(Carballar-Lejarazú et al. 2013)
GSI + Tn5	10T05g06 MAFF303099	GSI: 5’-AGCTTGAAGCCGGTGTTGTA-3’ Tn5: 5’-TTGCTGGCCTTTTGCTCACAT-3’	This study
nifD + Tn5	17T02d02 MAFF303099	nifD: 5’-GAGCGTGCCATTCTTCACGT-3’ Tn5: 5’-GCTCACATGTTCTTTCCTGGT-3’	This study
