# Supplementary material for: Evaluation of qPCR to Detect Shifts in Population Composition of the Rhizobial Symbiont Mesorhizobium japonicum during Serial in Planta Transfers
Source: Biology (Basel). 2023 Feb 9;12(2):277. doi: 10.3390/biology12020277 (PMC9953586; doi:10.3390/biology12020277)
Supplement: Supplementary file 1 [file biology-12-00277-s001.zip › Code S1.txt]

###Packages used###
library(ggplot2)
library(ggpubr)
library(ggpmisc)
library(dplyr)
library(tidyr)
library(ggExtra)
library(nima)
library(lme4)

###Importing excel tabs and adjusting NA values to 40###
library(readxl)

Vitro <- read_excel("qPCR_MDPI_SuppData.xlsx", sheet = "Vitro")
Vitro$CTRneg[is.na(Vitro$CTRneg)]<-40
Vitro$CTMneg[is.na(Vitro$CTMneg)]<-40

CFUcount <- read_excel("qPCR_MDPI_SuppData.xlsx", sheet = "CFUcount")

IndNods <- read_excel("qPCR_MDPI_SuppData.xlsx", sheet = "IndNods")
IndNods$CTRneg[is.na(IndNods$CTRneg)]<-40
IndNods$CTMneg[is.na(IndNods$CTMneg)]<-40

Pouch <- read_excel("qPCR_MDPI_SuppData.xlsx", sheet = "Pouch")
Pouch$CTRneg[is.na(Pouch$CTRneg)]<-40
Pouch$CTMneg[is.na(Pouch$CTMneg)]<-40

MB <- read_excel("qPCR_MDPI_SuppData.xlsx", sheet = "MB")
MB$CTRneg[is.na(MB$CTRneg)]<-40
MB$CT30neg[is.na(MB$CT30neg)]<-40
MB$CT6neg[is.na(MB$CT6neg)]<-40

###Calculating cell values###

#dsRed standard curve
10^((CTX-45.622)/-4.1975)

#STM30 standard curve
10^((CTX-46.418)/-4.2808)

#STM6 standard curve
10^((CTX-46.334)/-4.1538)

#in vitro
Vitro<- Vitro %>% 
  mutate(CellRadj = case_when(
    CTR < CTRneg ~ (10^((CTR-45.622)/-4.1975))*1250,
    TRUE ~ 0))

Vitro<-Vitro%>%
  mutate(CellMadj = case_when(
    CTM < CTMneg & exp == "R30" ~ 10^((CTM-46.418)/-4.2808)*1250,
    CTM < CTMneg & exp == "R6" ~ 10^((CTM-46.334)/-4.1538)*1250,
    TRUE ~ 0))

Vitro<- mutate(Vitro, qPCRpopadj = (CellRadj + CellMadj))
Vitro$qPCRpopadj<-na_if(Vitro$qPCRpopadj, 0)
Vitro<- mutate(Vitro, qPCRpropadj = CellRadj/qPCRpopadj)


#Individual Nodules
IndNods <- IndNods %>%
  mutate(CellRadj = case_when(
    CTR < CTRneg ~ 10^((CTR-45.622)/-4.1975)*1250,
    TRUE ~ 0))

IndNods <- IndNods %>%
  mutate(CellMadj = case_when(
    CTM < CTMneg & exp == "R30" ~ 10^((CTM-46.418)/-4.2808)*1250,
    CTM < CTMneg & exp == "R6" ~ 10^((CTM-46.334)/-4.1538)*1250,
    TRUE ~ 0))

IndNods<- mutate(IndNods, qPCRpopadj = (CellRadj + CellMadj))
IndNods$qPCRpopadj<-na_if(IndNods$qPCRpopadj,0)
IndNods<- mutate(IndNods, qPCRpropadj = CellRadj/ifelse(qPCRpopadj==0, NA, qPCRpopadj))


#Growth Pouch Passaging
Pouch <- Pouch %>%
  mutate(Cellhighadj = case_when(
    CThigh < CTRneg & exp == "R30_1:1" | exp == "R30_1:9" | exp == "R6_1:1" | exp=="R6_1:9" ~ 10^((CThigh-45.622)/-4.1975)*1250,
    CThigh < CTMneg & exp == "30_6_1:1" | exp == "30_6_1:9" ~ 10^((CThigh-46.418)/-4.2808)*1250,  ######Note: STM30 data were input to 'CTR' column as the more beneficial strain in this co-inoculation. The resulting CellRadj data in STM30:STM6 co-inoculations represent STM30, not wildtype 
    TRUE ~ 0))

Pouch <- Pouch %>%
  mutate(Celllowadj = case_when(
    CTlow < CTMneg & exp =="R30_1:1" | exp =="R30_1:9" ~ 10^((CTlow-46.418)/-4.2808)*1250,
    CTlow < CTMneg & exp =="R6_1:1" | exp =="R6_1:9" | exp =="30_6_1:1" | exp == "30_6_1:9" ~ 10^((CTlow-46.334)/-4.1538)*1250,
    TRUE ~ 0))

Pouch<- mutate(Pouch, qPCRpopadj = (Cellhighadj + Celllowadj))
Pouch$qPCRpopadj<-na_if(Pouch$qPCRpopadj, 0)
Pouch<- mutate(Pouch, qPCRpropadj = (Cellhighadj/qPCRpopadj))

#Magenta Box Passaging
MB<- MB %>%
  mutate(CellRadj = case_when(
    CTR < CTRneg ~ 10^((CTR-45.622)/-4.1975)*1250,
    TRUE ~ 0))

MB<- MB %>%
  mutate(Cell30adj = case_when(
    CT30 < CT30neg ~ 10^((CT30-46.418)/-4.2808)*1250,
    TRUE ~ 0))

MB<- MB %>%
  mutate(Cell6adj = case_when(
    CT6 < CT6neg ~ 10^((CT6-46.334)/-4.1538)*1250,
    TRUE ~ 0))

MB<- mutate(MB, qPCRpopadj = (CellRadj + Cell30adj + Cell6adj))
MB$qPCRpopadj<-na_if(MB$qPCRpopadj, 0)
MB<- mutate(MB, qPCRpropRadj = CellRadj/qPCRpopadj,
            qPCRprop30adj = Cell30adj/qPCRpopadj,
            qPCRprop6adj = Cell6adj/qPCRpopadj)

###reorganizing dataframes to include mean###
#in vitro
Vitroavg <- Vitro %>%
  group_by(exp, ID) %>%
  summarise(qPCRpropadjmean=mean(qPCRpropadj, na.rm=TRUE),
            CFUpropmean=mean(CFUprop, na.rm=TRUE),
            qPCRpopadjmean=mean(qPCRpopadj, na.rm=TRUE),
            CFUpopmean=mean(CFUpop, na.rm=TRUE),
            CTRmean=mean(CTR, na.rm=TRUE),
            CTMmean=mean(CTM, na.rm=TRUE),
            CellRmean=mean(CellRadj, na.rm=TRUE),
            CellMmean=mean(CellMadj, na.rm=TRUE))
Vitroavg <- mutate(Vitroavg, qPCRCellRpropadj = (CellRmean)/(CellRmean + CellMmean))

#Individual nodules
IndNodsavg <- IndNods %>%
  group_by(exp, meth, ID) %>%
  summarise(qPCRpropadjmean=mean(qPCRpropadj, na.rm=TRUE),
            CFUpropmean=mean(CFUprop, na.rm=TRUE),
            qPCRpopadjmean=mean(qPCRpopadj, na.rm=TRUE),
            CFUpopmean=mean(CFUpop, na.rm=TRUE),
            CTRmean=mean(CTR, na.rm=TRUE),
            CTMmean=mean(CTM, na.rm=TRUE),
            CellRmean=mean(CellRadj, na.rm=TRUE),
            CellMmean=mean(CellMadj, na.rm=TRUE))
IndNodsavg <- mutate(IndNodsavg, qPCRCellRpropadj = (CellRmean)/(CellRmean + CellMmean))

#Growth Pouch Passaging
Pouchavg <- Pouch %>%
  group_by(exp, pas) %>%
  summarise(qPCRpropadjmean=mean(qPCRpropadj, na.rm=TRUE),
            CFUpropmean=mean(CFUprop, na.rm=TRUE),
            qPCRpopadjmean=mean(qPCRpopadj, na.rm=TRUE),
            CFUpopmean=mean(CFUpop, na.rm=TRUE),
            Cellhighmean=mean(Cellhighadj, na.rm=TRUE),
            Celllowmean=mean(Celllowadj, na.rm=TRUE),
            Cellhighsd=sd(Cellhighadj, na.rm=TRUE),
            Celllowsd=sd(Celllowadj, na.rm=TRUE),
            Cellhighse=sd(Cellhighadj/sqrt(n())),
            Celllowse=sd(Celllowadj/sqrt(n())))
Pouchavg$pas[is.na(Pouchavg$pas)]<-0
Pouchavg <- mutate(Pouchavg, qPCRCellhighpropadj = (Cellhighmean)/(Cellhighmean + Celllowmean))

#Magenta Box Passaging
MBavg <- MB %>%
  group_by(exp, tray, lin, pas) %>%
  summarise(qPCRpropRadjmean=mean(qPCRpropRadj, na.rm=TRUE),
            qPCRprop30adjmean=mean(qPCRprop30adj, na.rm=TRUE),
            qPCRprop6adjmean=mean(qPCRprop6adj, na.rm=TRUE),
            CFUpropmean=mean(CFUprop, na.rm=TRUE),
            CellRadjmean=mean(CellRadj, na.rm=TRUE),
            Cell30adjmean=mean(Cell30adj, na.rm=TRUE),
            Cell6adjmean=mean(Cell6adj, na.rm=TRUE),
            CellRsd=sd(CellRadj, na.rm=TRUE),
            Cell30sd=sd(Cell30adj, na.rm=TRUE),
            Cell6sd=sd(Cell6adj, na.rm=TRUE),
            CellRse=sd(CellRadj/sqrt(n())),
            Cell30se=sd(Cell30adj/sqrt(n())),
            Cell6se=sd(Cell6adj/sqrt(n())))
MBavg <- mutate(MBavg, qPCRCellRpropadj = (CellRadjmean)/(CellRadjmean + Cell30adjmean + Cell6adjmean))
MBavg <- mutate(MBavg, qPCRCell30propadj = (Cell30adjmean)/(CellRadjmean + Cell30adjmean + Cell6adjmean))
MBavg <- mutate(MBavg, qPCRCell6propadj = (Cell6adjmean)/(CellRadjmean + Cell30adjmean + Cell6adjmean))


###Colors
wiltype: "#CC79A7"
STM30: "#E69F00"
STM6: "#56B4E9"
###Method comparison: linear regression & Bland-Altman###

#wildtype and STM30 in vitro
dfv30 <- (subset(Vitroavg, exp %in% c("R30")))
#wildtype and STM6 in vitro
dfv6 <- (subset(Vitroavg, exp %in% c("R6")))

##linear regression
figs2a <- ggplot(dfv30, aes(x = CFUpropmean, y = qPCRCellRpropadj, na.rm=TRUE)) +
  geom_smooth(method="lm", color= "grey50")+
  geom_point(aes(color = exp), size = 2)+
  theme_classic()+
  stat_poly_eq(formula = y~x, 
               aes(label = paste(..eq.label.., ..rr.label.., sep = "~~~")), 
               parse = TRUE,
               coef.digits = 3)+
  scale_color_manual(values =c("#E69F00"),
                     name = "Coinoculum", labels=c("wiltype:STM30"))+
  labs(x = "Wildtype proportion\nestimated by colony forming units", 
       y = "Wildtype proportion\nestimated by qPCR",
       title = expression(paste("wildtype:STM30 ", italic("in vitro"))))+
  theme(text=element_text(family = "Times New Roman"))+
  theme(legend.position = "bottom")+
  scale_y_continuous(limits  = c(0, 1.2))+
  scale_x_continuous(limits  = c(0, 1))

figs2b <- ggplot(dfv6, aes(x = CFUpropmean, y = qPCRCellRpropadj, na.rm=TRUE)) +
  geom_smooth(method="lm", color= "grey50")+
  geom_point(aes(color = exp), size = 2)+
  theme_classic()+
  stat_poly_eq(formula = y~x, 
               aes(label = paste(..eq.label.., ..rr.label.., sep = "~~~")), 
               parse = TRUE,
               coef.digits = 3)+
  scale_color_manual(values =c("#56B4E9"),
                     name = "Coinoculum", labels=c("wiltype:STM6"))+
  labs(x = "Wildtype proportion\nestimated by colony forming units", 
       y = "Wildtype proportion\nestimated by qPCR",
       title = expression(paste("wildtype:STM6 ", italic("in vitro"))))+
  theme(text=element_text(family = "Times New Roman"))+
  theme(legend.position = "bottom")+
  scale_y_continuous(limits  = c(0, 1.2))+
  scale_x_continuous(limits  = c(0, 1))+
  coord_cartesian(xlim=c(0,1), ylim=c(0,1.2))

figs2 <- ggarrange(figs2a, figs2b, labels="AUTO")
ggsave("figs2.png", plot = figs1, height = 3, width = 6.5, units = "in")

fig1a <- ggplot(IndNodsavg, aes(x = CFUpropmean, y = qPCRCellRpropadj, color = exp, na.rm=TRUE)) +
  geom_smooth(method="lm")+
  geom_point(alpha = 0.3)+
  geom_rug(na.rm=TRUE, alpha = 0.5)+
  theme_classic()+
  stat_poly_eq(formula = y~x, 
               aes(label = paste(..eq.label.., ..rr.label.., ..n.label..,sep = "~~~")),
               size = 3,
               parse = TRUE,
               coef.digits = 3)+
  scale_color_manual(values =c("#E69F00", "#56B4E9"),
                     name = "Coinoculum", labels=c("wiltype:STM30", "wiltype:STM6"))+
  labs(x = "Wildtype proportion\nestimated by colony forming units", 
       y = "Wildtype proportion\nestimated by qPCR",
       title = "",
       size = "CFU * 10^8")+
  theme(text=element_text(family = "Times New Roman"))+
  theme(legend.position = "none")+
  theme(legend.box = "veritcal")+
  scale_y_continuous(limits  = c(-0.2, 1.2))+
  scale_x_continuous(limits  = c(0, 1))+
  coord_cartesian(xlim=c(0,1), ylim=c(0,1))

IndNodsavgmix <-subset(IndNodsavg, CFUpropmean > 0 & CFUpropmean < 1)
IndNodsavgsing <-subset(IndNodsavg, CFUpropmean == 0 | CFUpropmean == 1)

fig1mix <- ggplot(IndNodsavgmix, aes(x = CFUpropmean, y = qPCRCellRpropadj, color = exp, na.rm=TRUE)) +
  geom_smooth(method="lm")+
  geom_point(alpha = 0.3)+
  geom_rug(na.rm=TRUE, alpha = 0.5)+
  theme_classic()+
  stat_poly_eq(formula = y~x, 
               aes(label = paste(..eq.label.., ..rr.label.., ..n.label.. ,sep = "~~~")), 
               size = 2.4,
               parse = TRUE,
               coef.digits = 3)+
  scale_color_manual(values =c("#E69F00", "#56B4E9"),
                     name = "Coinoculum", labels=c("wiltype:STM30", "wiltype:STM6"))+
  labs(x = "Wildtype proportion\nestimated by colony forming units", 
       y = "Wildtype proportion\nestimated by qPCR",
       title = "Coinfected nodules")+
  theme(text=element_text(family = "Times New Roman"))+
  theme(legend.position = "left")+
  theme(legend.box = "veritcal")+
  scale_y_continuous(limits  = c(-0.2, 1.2))+
  scale_x_continuous(limits  = c(0, 1))+
  coord_cartesian(xlim=c(0,1), ylim=c(0,1))

fig1sing <-ggplot(IndNodsavgsing, aes(x = CFUpropmean, y = qPCRCellRpropadj, color = exp, na.rm=TRUE)) +
  geom_smooth(method="lm")+
  geom_point(alpha = 0.3)+
  geom_rug(na.rm=TRUE, alpha = 0.5)+
  theme_classic()+
  stat_poly_eq(formula = y~x, 
               aes(label = paste(..eq.label.., ..rr.label.., ..n.label.. ,sep = "~~~")), 
               size = 2.4, 
               parse = TRUE,
               coef.digits = 3)+
  scale_color_manual(values =c("#E69F00", "#56B4E9"),
                     name = "Coinoculum", labels=c("wiltype:STM30", "wiltype:STM6"))+
  labs(x = "Wildtype proportion\nestimated by colony forming units", 
       y = "Wildtype proportion\nestimated by qPCR",
       title = "Clonal nodules")+
  theme(text=element_text(family = "Times New Roman"))+
  theme(legend.position = "left")+
  theme(legend.box = "veritcal")+
  scale_y_continuous(limits  = c(-0.2, 1.2))+
  scale_x_continuous(limits  = c(0, 1))+
  coord_cartesian(xlim=c(0,1), ylim=c(0,1))

fig1bc <- ggarrange(fig1mix, fig1sing, labels = c("B", "C"), ncol=2, legend = "none", common.legend = TRUE)
fig1full <- ggarrange(fig1a, fig1bc, labels = c("A", "",""), ncol=1, legend = "bottom", common.legend = TRUE)

ggsave("fig1.png", plot = fig1full, height=7, width=6.5, units = "in")

IndNodsavgA <-subset(IndNodsavg, CFUpopmean < 2.5E7)
IndNodsavgB <-subset(IndNodsavg, CFUpopmean > 2.5E7 & CFUpopmean < 7.5E7)
IndNodsavgC <-subset(IndNodsavg, CFUpopmean > 7.5E7 & CFUpopmean < 2.5E8)
IndNodsavgD <-subset(IndNodsavg, CFUpopmean > 2.5E8)

figs4a <- ggplot(IndNodsavgA, aes(x = CFUpropmean, y = qPCRCellRpropadj, color = exp, na.rm=TRUE)) +
             geom_smooth(method="lm")+
             geom_point(alpha = 0.3)+
             geom_jitter()+
             geom_rug(na.rm=TRUE, alpha = 0.5, position ="jitter")+
             theme_classic()+
             stat_poly_eq(formula = y~x, 
                          aes(label = paste(..eq.label.., ..rr.label.., ..n.label.. ,sep = "~~~")),
                          size =2.4,
                          parse = TRUE,
                          coef.digits = 3)+
             scale_color_manual(values =c("#E69F00", "#56B4E9"),
                                name = "Coinoculum", labels=c("wiltype:STM30", "wiltype:STM6"))+
             labs(x = "Wildtype proportion\nestimated by colony forming units", 
                  y = "Wildtype proportion\nestimated by qPCR",
                  title = "CFU < 2.5E7")+
             theme(text=element_text(family = "Times New Roman"))+
             theme(legend.position = "left")+
             theme(legend.box = "veritcal")+
             scale_y_continuous(limits  = c(-0.2, 1.2))+
             scale_x_continuous(limits  = c(0, 1))+
             coord_cartesian(xlim=c(0,1), ylim=c(0,1))

figs4b <- ggplot(IndNodsavgB, aes(x = CFUpropmean, y = qPCRCellRpropadj, color = exp, na.rm=TRUE)) +
  geom_smooth(method="lm")+
  geom_point(alpha = 0.3)+
  geom_jitter()+
  geom_rug(na.rm=TRUE, alpha = 0.5, position ="jitter")+
  theme_classic()+
  stat_poly_eq(formula = y~x, 
               aes(label = paste(..eq.label.., ..rr.label.., ..n.label.. ,sep = "~~~")),
               size = 2.4,
               parse = TRUE,
               coef.digits = 3)+
  scale_color_manual(values =c("#E69F00", "#56B4E9"),
                     name = "Coinoculum", labels=c("wiltype:STM30", "wiltype:STM6"))+
  labs(x = "Wildtype proportion\nestimated by colony forming units", 
       y = "Wildtype proportion\nestimated by qPCR",
       title = "2.5E7 < CFU < 7.5E7")+
  theme(text=element_text(family = "Times New Roman"))+
  theme(legend.position = "left")+
  theme(legend.box = "veritcal")+
  scale_y_continuous(limits  = c(-0.2, 1.2))+
  scale_x_continuous(limits  = c(0, 1))+
  coord_cartesian(xlim=c(0,1), ylim=c(0,1))

figs4c <- ggplot(IndNodsavgC, aes(x = CFUpropmean, y = qPCRCellRpropadj, color = exp, na.rm=TRUE)) +
  geom_smooth(method="lm")+
  geom_point(alpha = 0.3)+
  geom_jitter()+
  geom_rug(na.rm=TRUE, alpha = 0.5, position ="jitter")+
  theme_classic()+
  stat_poly_eq(formula = y~x, 
               aes(label = paste(..eq.label.., ..rr.label.., ..n.label.. ,sep = "~~~")),
               size = 2.4,
               parse = TRUE,
               coef.digits = 3)+
  scale_color_manual(values =c("#E69F00", "#56B4E9"),
                     name = "Coinoculum", labels=c("wiltype:STM30", "wiltype:STM6"))+
  labs(x = "Wildtype proportion\nestimated by colony forming units", 
       y = "Wildtype proportion\nestimated by qPCR",
       title = "7.5E7 < CFU < 2.5E8")+
  theme(text=element_text(family = "Times New Roman"))+
  theme(legend.position = "left")+
  theme(legend.box = "veritcal")+
  scale_y_continuous(limits  = c(-0.2, 1.2))+
  scale_x_continuous(limits  = c(0, 1))+
  coord_cartesian(xlim=c(0,1), ylim=c(0,1))

figs4d <- ggplot(IndNodsavgD, aes(x = CFUpropmean, y = qPCRCellRpropadj, color = exp, na.rm=TRUE)) +
  geom_smooth(method="lm")+
  geom_point(alpha = 0.3)+
  geom_jitter()+
  geom_rug(na.rm=TRUE, alpha = 0.5, position ="jitter")+
  theme_classic()+
  stat_poly_eq(formula = y~x, 
               aes(label = paste(..eq.label.., ..rr.label.., ..n.label.. ,sep = "~~~")),
               size = 2.4,
               parse = TRUE,
               coef.digits = 3)+
  scale_color_manual(values =c("#E69F00", "#56B4E9"),
                     name = "Coinoculum", labels=c("wiltype:STM30", "wiltype:STM6"))+
  labs(x = "Wildtype proportion\nestimated by colony forming units", 
       y = "Wildtype proportion\nestimated by qPCR",
       title = "CFU > 2.5E8")+
  theme(text=element_text(family = "Times New Roman"))+
  theme(legend.position = "left")+
  theme(legend.box = "veritcal")+
  scale_y_continuous(limits  = c(-0.2, 1.2))+
  scale_x_continuous(limits  = c(0, 1))+
  coord_cartesian(xlim=c(0,1), ylim=c(0,1))

figs4 <- ggarrange(figs4a, figs4b, figs4c, figs4d, labels = c("A","B", "C", "D"),legend = "bottom", common.legend = TRUE)
ggsave("figs4.png", plot = figs4, height=6.5, width=6.5, units = "in")


###Bland-Altman Plots###
#wildtype and STM30 in vitro
dfv30 <- (subset(Vitroavg, exp %in% c("R30")))
#wildtype and STM6 in vitro
dfv6 <- (subset(Vitroavg, exp %in% c("R6")))
#wildtype and STM30 Individual Nodules
dfp30 <- (subset(IndNodsavg, exp %in% c("R30")))
#wildtype and STM6 Individual Nodules
dfp6 <- (subset(IndNodsavg, exp %in% c("R6")))

##Assign vectors after setting given df 
CFUv30 <- dfv30$CFUpropmean
qPCRv30 <- dfv30$qPCRCellRpropadj

blandaltAvgv30 <- (CFUv30+qPCRv30)/2
blandaltDifv30 <- (CFUv30-qPCRv30)

figs3a <- ggplot(dfv30, aes(x = blandaltAvgv30, y = blandaltDifv30, na.rm=TRUE)) +
  geom_smooth(method="lm")+
  stat_poly_eq(formula = y~x, 
               aes(label = paste(..eq.label.., ..rr.label.., sep = "~~~")),
               label.y = 1,
               parse = TRUE) +  
  geom_point(alpha = 0.5) +
  geom_hline(yintercept = mean(blandaltDifv30, na.rm = TRUE), colour = "black", size = 0.5) +
  geom_hline(yintercept = mean(blandaltDifv30, na.rm = TRUE) - (1.96 * sd(blandaltDifv30, na.rm = TRUE)), colour = "red", size = 0.5) +
  geom_hline(yintercept = mean(blandaltDifv30, na.rm = TRUE) + (1.96 * sd(blandaltDifv30, na.rm = TRUE)), colour = "red", size = 0.5) +
  labs(x = "CFU and qPCR Mean Measures", 
       y = "Difference Between CFU and qPCR",
       title = expression(paste("wildtype:STM30 ", italic("in vitro"))))

CFUv6 <- dfv6$CFUpropmean
qPCRv6 <- dfv6$qPCRCellRpropadj

blandaltAvgv6 <- (CFUv6+qPCRv6)/2
blandaltDifv6 <- (CFUv6-qPCRv6)

figs3b <- ggplot(dfv6, aes(x = blandaltAvgv6, y = blandaltDifv6, na.rm=TRUE)) +
  geom_smooth(method="lm")+
  stat_poly_eq(formula = y~x, 
               aes(label = paste(..eq.label.., ..rr.label.., sep = "~~~")), 
               label.y = 1,
               parse = TRUE) +  
  geom_point(alpha = 0.5) +
  geom_hline(yintercept = mean(blandaltDifv6, na.rm = TRUE), colour = "black", size = 0.5) +
  geom_hline(yintercept = mean(blandaltDifv6, na.rm = TRUE) - (1.96 * sd(blandaltDifv6, na.rm = TRUE)), colour = "red", size = 0.5) +
  geom_hline(yintercept = mean(blandaltDifv6, na.rm = TRUE) + (1.96 * sd(blandaltDifv6, na.rm = TRUE)), colour = "red", size = 0.5) +
  labs(x = "CFU and qPCR Mean Measures", 
       y = "Difference Between CFU and qPCR",
       title = expression(paste("wildtype:STM6 ", italic("in vitro"))))

figs3ab <- ggarrange(figs3a, figs3b, labels = c("A", "B"))

CFUp30 <- dfp30$CFUpropmean
qPCRp30 <- dfp30$qPCRCellRpropadj

blandaltAvgp30 <- (CFUp30+qPCRp30)/2
blandaltDifp30 <- (CFUp30-qPCRp30)

figs3c <- ggplot(dfp30, aes(x = blandaltAvgp30, y = blandaltDifp30, na.rm=TRUE)) +
  geom_smooth(method="lm")+
  stat_poly_eq(formula = y~x, 
               aes(label = paste(..eq.label.., ..rr.label.., sep = "~~~")), 
               parse = TRUE) +  
  geom_point(alpha = 0.5) +
  geom_hline(yintercept = mean(blandaltDifp30, na.rm = TRUE), colour = "black", size = 0.5) +
  geom_hline(yintercept = mean(blandaltDifp30, na.rm = TRUE) - (1.96 * sd(blandaltDifp30, na.rm = TRUE)), colour = "red", size = 0.5) +
  geom_hline(yintercept = mean(blandaltDifp30, na.rm = TRUE) + (1.96 * sd(blandaltDifp30, na.rm = TRUE)), colour = "red", size = 0.5) +
  labs(x = "CFU and qPCR Mean Measures", 
       y = "Difference Between CFU and qPCR",
       title = expression(paste("wildtype:STM30 ", italic("in planta"))))

CFUp6 <- dfp6$CFUpropmean
qPCRp6 <- dfp6$qPCRCellRpropadj

blandaltAvgp6 <- (CFUp6+qPCRp6)/2
blandaltDifp6 <- (CFUp6-qPCRp6)

figs3d <- ggplot(dfp6, aes(x = blandaltAvgp6, y = blandaltDifp6, na.rm=TRUE)) +
  geom_smooth(method="lm")+
  stat_poly_eq(formula = y~x, 
               aes(label = paste(..eq.label.., ..rr.label.., sep = "~~~")), 
               parse = TRUE) +  
  geom_point(alpha = 0.5) +
  geom_hline(yintercept = mean(blandaltDifp6, na.rm = TRUE), colour = "black", size = 0.5) +
  geom_hline(yintercept = mean(blandaltDifp6, na.rm = TRUE) - (1.96 * sd(blandaltDifp6, na.rm = TRUE)), colour = "red", size = 0.5) +
  geom_hline(yintercept = mean(blandaltDifp6, na.rm = TRUE) + (1.96 * sd(blandaltDifp6, na.rm = TRUE)), colour = "red", size = 0.5) +
  labs(x = "CFU and qPCR Mean Measures", 
       y = "Difference Between CFU and qPCR",
       title = expression(paste("wildtype:STM6 ", italic("in planta"))))

figs3cd <- ggarrange(figs3c, figs3d, labels = c("C", "D"))
figs3 <- ggarrange(figs3ab, figs3cd, nrow = 2)

ggsave("figs3.png", plot = figs3, height = 6.5, width = 6.5, units = "in")

###Passaging###
#Growth Pouch Passaging
Pouchavg<-Pouchavg%>%
  mutate(expinoc = case_when(
    exp == "30_6_1:1" | exp == "30_6_1:9" ~ "30_6",
    exp == "R30_1:1" | exp == "R30_1:9" ~ "R30",
    exp == "R6_1:1" | exp == "R6_1:9" ~ "R6"))

Pouchavg$exp <- factor(Pouchavg$exp, levels = c("R30_1:1",
                                             "R30_1:9",
                                             "R6_1:1",
                                             "R6_1:9",
                                             "30_6_1:1",
                                             "30_6_1:9"))

fig2 <- ggplot(Pouchavg, aes(x=pas, y=qPCRCellhighpropadj, color=exp))+
  geom_point(size=1)+
  geom_line()+
  theme_classic()+
  theme(text=element_text(family = "Times New Roman", size = 9))+
  scale_color_manual(values =c("#E69F00", "#D55E00","#56B4E9", "#0072B2", "#009E73","#CC79A7"),
                     name = "Initial Inoculum Ratios", labels=c("wildtype:STM30(1:1)",
                                                                "wildtype:STM30(1:9)",
                                                                "wildtype:STM6(1:1)",
                                                                "wildtype:STM6(1:9)",
                                                                "STM30:STM6(1:1)",
                                                                "STM30:STM6(1:9)"))+
  labs(x = "Passage", 
       y = "Proportion of more beneficial genotype\nestimated by qPCR",
       title = "")

ggsave("fig2.png", plot = fig2, height = 2.5, width = 3.25, units ="in")

figs5 <- ggplot(Pouchavg, aes(x=pas, group = exp))+
  geom_line(aes(y = Cellhighmean, color = "More Beneficial"))+
  geom_line(aes(y = Celllowmean, color = "Less Beneficial"))+
  geom_point(aes(y = Cellhighmean))+
  geom_point(aes(y = Celllowmean))+
  geom_errorbar(aes(ymin = Cellhighmean-Cellhighse, ymax = Cellhighmean+Cellhighse))+
  geom_errorbar(aes(ymin = Celllowmean-Celllowse, ymax = Celllowmean+Celllowse))+
  theme_classic()+
  theme(text=element_text(family = "Times New Roman", size = 9))+
  scale_color_manual(values =c("#0072B2", "#D55E00"),
                     name = "Relative Benefit Phenotype")+
  labs(x = "Passage", 
       y = "Cell count estimated by qPCR",
       title = "")+
  theme(legend.position = "bottom")+
  facet_wrap(~exp, ncol = 2, labeller = labeller(exp = 
                                         c("R30_1:1" ="wildtype:STM30(1:1)", 
                                           "R30_1:9" ="wildtype:STM30(1:9)",
                                           "R6_1:1" = "wildtype:STM6(1:1)",
                                           "R6_1:9" = "wildtype:STM6(1:9)",
                                           "30_6_1:1" = "STM30:STM6(1:1)",
                                           "30_6_1:9" = "STM30:STM6(1:9)")))

ggsave("figs5.png", plot = figs5, height=6.5, width=6.5, units ="in")

figs6a <- ggplot(subset(Pouchavg, expinoc%in% c("R30", "R6")),
                 aes(x=CFUpropmean, y=qPCRCellhighpropadj, color =expinoc))+
  geom_point()+
  geom_smooth(method = "lm")+
  theme_classic()+
  stat_poly_eq(formula = y~x, 
               aes(label = paste(..eq.label.., ..rr.label.., sep = "~~~")), 
               parse = TRUE,
               label.y=c(1.0, 0.9))+
  scale_color_manual(values =c("#E69F00", "#56B4E9"),
                     name = "Coinoculum", labels=c("wiltype:STM30", "wiltype:STM6"))+
  labs(x = "Wildtype proportion estimated by colony forming units", 
       y = "Wildtype proportion\nestimated by qPCR",
       title = "")

figs6b <- ggplot(subset(Pouchavg, exp %in% c("R30_1:1",
                                   "R30_1:9",
                                   "R6_1:1",
                                   "R6_1:9")),
       aes(x=pas, y=CFUpropmean, color=exp))+
  geom_point(size=1)+
  geom_line()+
  theme_classic()+
  theme(text=element_text(family = "Times New Roman", size = 9))+
  scale_color_manual(values =c("#E69F00", "#D55E00","#56B4E9", "#0072B2"),
                     name = "Initial Inoculum Ratios", labels=c("wildtype:STM30(1:1)",
                                                                "wildtype:STM30(1:9)",
                                                                "wildtype:STM6(1:1)",
                                                                "wildtype:STM6(1:9)"))+
  labs(x = "Passage", 
       y = "Wildtype proportion\nestimated by CFU",
       title = "")

figs6 <- ggarrange(figs6a, figs6b, labels = c("A", "B"), ncol=1)
ggsave("figs6.png", plot = figs6, height = 5, width = 6.5, unit = "in")

#Magenta Box Passaging, two genotypes

#wildtype and STM30
dfMBR30<- (subset(MBavg, exp %in% c("R30")))

fig3a <- ggplot(dfMBR30, aes(x=pas, y=qPCRCellRpropadj))+
  geom_point(data = dfMBR30, aes(shape = tray, color = exp))+
  geom_line(data = dfMBR30, aes(shape = tray, color = exp))+
  theme_classic()+
  scale_shape_manual(values = c(15,17,19),
                     name = "Lineage", labels=c("1", "2", "3"))+
  scale_color_manual(values =c("#E69F00", "#E69F00","#E69F00"),
                     name = "Coinoculum", labels=c("wildtype:STM30"))+
  labs(x = "Passage", 
       y = "Wildtype proportion\nestimated by qPCR",
       title = "wildtype:STM30")+
  theme(legend.position = "none", legend.box="vertical", legend.spacing.y= unit(-0.1, "in"))+
  scale_y_continuous(limits  = c(0, 1))+
  scale_x_continuous(limits  = c(0, 3))

#wildtype and STM6
dfMBR6<- (subset(MBavg, exp %in% c("R6")))

fig3b <- ggplot(dfMBR6, aes(x=pas, y=qPCRCellRpropadj))+
  geom_point(data = dfMBR6, aes(shape = tray, color = exp))+
  geom_line(data = dfMBR6, aes(shape = tray, color = exp))+
  theme_classic()+
  scale_shape_manual(values = c(15,17,19),
                     name = "Lineage", labels=c("1", "2", "3"))+
  scale_color_manual(values =c("#56B4E9", "#56B4E9","#56B4E9"),
                     name = "Coinoculum", labels=c("wildtype:STM6"))+
  labs(x = "Passage", 
       y = "Wildtype proportion\nestimated by qPCR",
       title = "wildtype:STM6")+
  theme(legend.position = "none", legend.box="vertical", legend.spacing.y= unit(-0.1, "in"))+
  scale_y_continuous(limits  = c(0, 1))+
  scale_x_continuous(limits  = c(0, 3))
  
fig3ab<-ggarrange(fig3a, fig3b, labels = c("A", "B"))

figs7a <- ggplot(dfMBR30, aes(x=pas))+
  geom_line(aes (y = CellRadjmean, color = "wildtype"))+
  geom_line(aes (y = Cell30adjmean, color = 'STM30'))+
  geom_point(aes(y = CellRadjmean))+
  geom_point(aes(y = Cell30adjmean))+
  geom_errorbar(aes(ymin = CellRadjmean-CellRse, ymax = CellRadjmean+CellRse))+
  geom_errorbar(aes(ymin = Cell30adjmean-Cell30se, ymax = Cell30adjmean+Cell30se))+
  theme_classic()+
  theme(text=element_text(family = "Times New Roman", size = 9))+
  scale_color_manual(values =c("#E69F00", "#CC79A7"),
                     name = "Symbiont Genotype")+
  labs(x = "Passage", 
       y = "Cell count estimated by qPCR",
       title = "wildtype:STM30")+
  theme(legend.position = "bottom")+
  facet_wrap(~tray, labeller = labeller(tray = 
                                          c("A" = "Lineage\nReplicate 1",
                                            "C" = "Lineage\nReplicate 2",
                                            "E" = "Lineage\nReplicate 3")))+
  theme(strip.text.x = element_blank())

figs7b <- ggplot(dfMBR6, aes(x=pas))+
  geom_line(aes (y = CellRadjmean, color = "wildtype"))+
  geom_line(aes (y = Cell6adjmean, color = 'STM6'))+
  geom_point(aes(y = CellRadjmean))+
  geom_point(aes(y = Cell6adjmean))+
  geom_errorbar(aes(ymin = CellRadjmean-CellRse, ymax = CellRadjmean+CellRse))+
  geom_errorbar(aes(ymin = Cell6adjmean-Cell6se, ymax = Cell6adjmean+Cell6se))+
  theme_classic()+
  theme(text=element_text(family = "Times New Roman", size = 9))+
  scale_color_manual(values =c("#56B4E9", "#CC79A7"),
                     name = "Symbiont Genotype")+
  labs(x = "Passage", 
       y = "Cell count estimated by qPCR",
       title = "wildtype:STM6")+
  theme(legend.position = "bottom")+
  facet_wrap(~tray, labeller = labeller(tray = 
                                          c("A" = "Lineage\nReplicate 1",
                                            "C" = "Lineage\nReplicate 2",
                                            "E" = "Lineage\nReplicate 3")))+
  theme(strip.text.x = element_blank())

figs7<-ggarrange(figs7a, figs7b, labels = c("A", "B"))
ggsave("figs7.png", plot = figs7, height = 4, width = 6.5, unit = "in")  


#STM30 and STM6 
dfMB306<- (subset(MBavg, exp %in% c("306_1","306_9")))

fig3c<-ggplot(dfMB306, aes(x=pas, y=qPCRCell30propadj))+
  geom_point(data = dfMB306, aes(color = interaction(exp, tray, lin)), alpha=0.5)+
  geom_line(data = dfMB306, aes(color = interaction(exp, tray, lin)), linetype="dashed", alpha=0.7)+
  theme_classic()+
  scale_color_hue(name = "Lineage", labels=c("1", "2", "3", "4", "5","6", "7", "8", "9", "10",
                                             "11", "12", "13", "14", "15", "16", "17", "18", "19", "20"))+
  labs(x = "Passage", 
       y = "STM30 proportion\nestimated by qPCR",
       title = "STM30:STM6")+
  theme(legend.position = "none")+
  guides(color = guide_legend(nrow=2))+
  scale_y_continuous(limits  = c(0, 1))+
  scale_x_continuous(limits  = c(0, 3))

fig3c <- ggarrange(fig3c, labels = "C")

fig3<-ggarrange(fig3ab, fig3c, nrow=2)
ggsave("fig3.png", plot = fig3, height = 6.5, width = 6.5, unit = "in")  

figs8 <- ggplot(dfMB306, aes(x=pas))+
  geom_line(aes (y = Cell30adjmean, color = "STM30"))+
  geom_line(aes (y = Cell6adjmean, color = 'STM6'))+
  geom_point(aes(y = Cell30adjmean))+
  geom_point(aes(y = Cell6adjmean))+
  geom_errorbar(aes(ymin = Cell30adjmean-Cell30se, ymax = Cell30adjmean+Cell30se))+
  geom_errorbar(aes(ymin = Cell6adjmean-Cell6se, ymax = Cell6adjmean+Cell6se))+
  theme_classic()+
  theme(text=element_text(family = "Times New Roman", size = 9))+
  scale_color_manual(values =c("#E69F00","#56B4E9"),
                     name = "Symbiont Genotype")+
  labs(x = "Passage", 
       y = "Cell count estimated by qPCR",
       title = "STM30:STM6")+
  theme(legend.position = "bottom")+
  facet_wrap(~exp + tray + lin,ncol = 5) +
  theme(strip.text.x = element_blank())

ggsave("figs8.png", plot = figs8, height = 6.5, width = 6.5, unit = "in")  
#Magenta Box Passaging, three genotypes
MB3pas<- (subset(MBavg, exp == "R306"))

MB3pasprop = select(MB3pas, pas, 
               qPCRCellRpropadj, qPCRCell30propadj, qPCRCell6propadj)%>%
  gather("qPCRCellRpropadj", "qPCRCell30propadj", "qPCRCell6propadj",
         key = geno, value=mean)
MB3pasprop$geno <- factor(MB3pasprop$geno, levels = c("qPCRCellRpropadj", 
                                                    "qPCRCell30propadj", 
                                                    "qPCRCell6propadj"))

fig4<-ggplot(MB3pasprop, aes(x=pas, y=mean, color=geno))+
  geom_point()+ 
  geom_line()+
  theme_classic()+  scale_color_manual(values =c("#CC79A7","#E69F00","#56B4E9"),
                                       name = "Genotype", labels=c("wildtype","STM30","STM6"))+
  labs(x = "Passage", 
       y = "Genotype proportion\nestimated by qPCR",
       title = "")+
  theme(legend.position = c(0.35, 1.1),
        legend.direction = "horizontal",
    legend.text=element_text(size = 7))+
  guides(color=guide_legend(hjust=-0.5))+
  scale_y_continuous(limits  = c(0, 1.0))+
  scale_x_continuous(limits  = c(0, 3))+
  facet_wrap(~tray+lin, ncol=5)+
  theme(strip.background = element_blank(),
          strip.text.x = element_blank())

ggsave("fig4.png", plot=fig4, height = 3, width = 3, unit = "in")

figs9 <- ggplot(MB3pas, aes(x=pas))+
  geom_line(aes (y = CellRadjmean, color = "wildtype"))+
  geom_line(aes (y = Cell30adjmean, color = "STM30"))+
  geom_line(aes (y = Cell6adjmean, color = 'STM6'))+
  geom_point(aes(y = CellRadjmean))+
  geom_point(aes(y = Cell30adjmean))+
  geom_point(aes(y = Cell6adjmean))+
  geom_errorbar(aes(ymin = CellRadjmean-CellRse, ymax = CellRadjmean+CellRse))+
  geom_errorbar(aes(ymin = Cell30adjmean-Cell30se, ymax = Cell30adjmean+Cell30se))+
  geom_errorbar(aes(ymin = Cell6adjmean-Cell6se, ymax = Cell6adjmean+Cell6se))+
  theme_classic()+
  theme(text=element_text(family = "Times New Roman", size = 9))+
  scale_color_manual(values =c("#E69F00","#56B4E9","#CC79A7"),
                     name = "Symbiont Genotype")+
  labs(x = "Passage", 
       y = "Cell count estimated by qPCR",
       title = "wildtype:STM30:STM6")+
  theme(legend.position = "bottom")+
  facet_wrap(~tray + lin, ncol=5) +
  theme(strip.text.x = element_blank())

ggsave("figs9.png", plot=figs9, height = 5.5, width = 6.5, unit = "in")
